# Supplementary material
Source: PubMed Central journal article supplement (PMC9588672)
Supplement: NIHMS1827849-supplement-1.pdf [file NIHMS1827849-supplement-1.pdf]

## SUPPLEMENTARY DATA

Detailed Materials and Methods

Supplementary Figure 1. Overview of *Fan1*-alleles and genotyping results.

Supplementary Figure 2. Collagen 3 expression is increased in *Fan1* KO kidneys after cisplatin injury.

Supplementary Figure 3. Increased expression of DNA damage markers in *Fan1* KO kidneys after cisplatin injury.

Supplementary Figure 4. *Fan1* KO kidneys fail to repair long-term tubular cell DNA damage.

Supplementary Figure 5. Increased fibrosis and DNA damage in *Fan1* KO kidneys after 4 days of UUO.

Supplementary Figure 6. Increased levels of oxidative DNA damage in *Fan1* KO kidneys after 4 days of UUO.

Supplementary Figure 7. SOX9 expression is upregulated in *Fan1* KO kidneys after injury.

Supplementary Figure 8. Markers of failed tubular repair, VCAM1 and CCL2 are upregulated in *Fan1* KO kidneys 28 days after cisplatin injury.

Supplementary Figure 9. Principal component analysis reveals *Fan1*- and gender-dependent differences in mouse kidneys after cisplatin injury.

Supplementary Figure 10. Cisplatin induces cell cycle activity in *Fan1* KO kidneys.

Supplementary Figure 11. Persistent DNA damage leads to abnormal co-expression of p21 and MCM2 in *Fan1* KO kidneys.

Supplementary Figure 12. Confirmation of loss of FAN1 expression in human *FAN1* KO CRISPR/Cas9 kidney proximal tubule cells.

Supplementary Figure 13. Roscovitine treatment blocks S phase activity in *Fan1* KO kidneys.

Supplementary Figure 14. Fucci assay combined with FACS reveals a distinct polyploid cell population in *FAN1* KO hPTECs.

Supplementary Figure 15. Fucci assay can be used to monitor polyploidization in *FAN1* KO hPTECs.

Supplementary Figure 16. Inhibiting *Cdkn1a* expression blocks karyomegaly in human *FAN1* KO CRISPR/Cas9 kidney proximal tubule cells.

Supplementary Table 1. Differentially expressed genes between untreated control and untreated *Fan1* KO kidneys.

Supplementary Table 2. Differentially expressed genes between untreated control and cisplatin treated control kidneys

Supplementary Table 3. Differentially expressed genes between cisplatin treated control and cisplatin treated *Fan1* KO kidneys

Supplementary Table 4. List of antibodies and lectins used in the study.

Supplementary Table 5. List of quantitative RT-PCR primers and sgRNA sequence used in this study.

## DETAILED MATERIALS AND METHODS

### Induction of KIN and drug administration

To induce karyomegalic interstitial nephritis in *Fan1* KO mice 8-12 weeks old male and female mice were injected intraperitoneally with pharmaceutical grade cisplatin (2 mg/kg) (Fresenius Kabi), weekly for 5 weeks, as previously <sup>1</sup>. Control mice received PBS. For RNAseq studies the mice were treated as outlined above and euthanized one week after the last cisplatin injection. The mice were divided into 4 experimental cohorts, 1) ctrl (PBS), 2) *Fan1*KO (PBS), 3) ctrl (cisplatin), 4) *Fan1* KO (cisplatin); each cohort consisting of 2 male and 1 female mice. For short-term cisplatin injury studies, the mice were treated as outlined above and euthanized one week after the last cisplatin injection. The mice were divided into 4 experimental cohorts, 1) ctrl (PBS), 2) *Fan1* KO (PBS), 3) ctrl (cisplatin), 4) *Fan1* KO (cisplatin); each cohort consisting of 5 male mice. For long-term recovery studies, the mice were treated as outlined above, and euthanized 28 days after the last cisplatin administration. The mice were divided into 4 experimental cohorts, 1) ctrl (PBS), 2) *Fan1* KO (PBS), 3) ctrl (cisplatin), 4) *Fan1* KO (cisplatin); each cohort consisting of 3 male mice. For roscovitine studies the mice were divided into 6 experimental cohorts, 1) ctrl (PBS), 2) *Fan1* KO (PBS), 3) ctrl (cisplatin), 4) *Fan1* KO (cisplatin), 5) ctrl (Roscovitine + cisplatin) and 6) *Fan1* KO (Roscovitine + cisplatin); each cohort consisting of 4 male mice. Roscovitine was administered at 150 mg/kg (LC Laboratories) 1 hour before cisplatin injection, as outlined in the Results section. Roscovitine was dissolved in DMSO (400 mg/ml), aliquoted and stored at -20C. On a day of administration roscovitine aliquots were dissolved in 10%Tween80/20%PEG400/70%(30%-(2-Hydroxypropyl)- $\beta$ -cyclodextrin)) solution. Control mice received PBS injections of equivalent volumes. Mouse body weight at the time of injection ranged from 25 to 40 g. Mouse survival was 100% in all of the experiments.

### Unilateral ureteral obstruction.

3 male and 2 female *Fan1* KO mice and control mice weighing 22–25 g were used for UUO. The mice were anesthetized with methoxyflurane following protocols approved by the IACUC at the University of Pittsburgh. After induction of anesthesia, the left flank was opened through a small incision, and the left ureter was completely ligated with 2-0 suture at two points <sup>2</sup>. Mice were monitored postoperatively, and both kidneys were harvested for analysis 4 days after initial surgery. Mouse survival was 100% in the UUO experiment.

### **Tubular injury score**

Whole kidneys were stained with periodic acid–Schiff (PAS) and were imaged using a Leica DM2500 microscope. Tubular injury scores were assigned to PAS-stained kidney sections (5 µm) by an experienced kidney pathologist who was blinded to the identity of the samples. Tubular injury/degeneration was defined as including luminal cell casts, and acellular/atrophic changes, and scoring was as follows: 0 = none detected; 1 = 1%–10% tubules involved; 2 = 10%–25% tubules involved; 3 = 25%–50% tubules involved; 4 = greater than 50% tubules involved. Karyomegaly was defined as the presence of enlarged nuclei in the tubules, and scoring was as follows: 0 = no enlarged cells; 1 = presence of enlarged cells.

### **Histological and immunofluorescence analysis of kidneys**

Kidneys were fixed with 4% paraformaldehyde overnight at 4°C, embedded in paraffin and sectioned at 5µm thickness. Staining with hematoxylin and eosin, periodic acid–Schiff (PAS), or Masson’s trichrome reagents were performed according to manufacturer’s protocols. For immunostaining sections were blocked in 10% donkey serum/1% BSA and permeabilized in 0.5% Triton X-100.

### **Cell lines**

Primary human kidney proximal tubular cells (hPTECs) were isolated as reported<sup>3</sup> and cultured in DMEM/F12 containing 5% FBS (Atlas Biologicals), 100 U/ml penicillin, 100ug/ml streptomycin, Insulin-Transferrin-Selenium and Glutamax-I (Gibco). Cell culture plates were coated with 5µg/cm<sup>2</sup> rat tail collagen-1 (Corning 354236) and incubated for 1h. The cells were cultured in 5% CO<sub>2</sub> at 37°C. Passage 2 hPTECs were transduced with lentiviral particle expressing E6E7 plasmid (Addgene #52394).

### **Immunofluorescence**

Cells plated on coverslips were washed once with PBS and fixed with 4% paraformaldehyde for 10 min. 0.5% Triton X-100 was added to cells for 10 min for permeabilization. Coverslips were then blocked with blocking buffer (10% donkey serum/ 0.25% Tween/ 1% BSA) for 1hr and incubated with primary antibody overnight at 4°C. Following overnight incubation, coverslips were washed three times with PBS, then

incubated with secondary antibody (Alexa Fluor, Life Technologies) for 1.5 h. Coverslips were mounted with DAPI medium and visualized under the fluorescence microscope.

### **CRISPR/Cas9 genome editing**

Human kidney proximal tubule *FAN1* knockout cells were generated using CRISPR/Cas9 technology. Briefly, hPTEC cells were transfected with a pSpCas9(BB)-2A-GFP (PX458) plasmid (Addgene, #48138) containing a *FAN1* sgRNA. Forty-eight hours post-transfection, GFP-positive cells were sorted by fluorescence activated cell sorting (FACS) and single cells were grown into 96-well plates until colonies formed. Loss of *FAN1* expression was monitored by Western blotting using anti-FAN1 antibody and confirmed by Sanger sequencing.

### **Generation and Imaging of Fucci cell lines**

To generate parental (control) and *FAN1* KO hPTEC tFucci(SA)5 expressing stable cell lines, we employed the PiggyBac transposon system<sup>4</sup>. The pPBbsr-based tFucci(SA)5 (Addgene plasmid #153520) was a gift from Atsushi Miyawaki. Super piggyBac Transposase expression vector was purchased from System Biosciences LLC (#PB210PA-1). tFucci(SA)5 and transposase encoding vectors were cotransfected into hPTECs using Lipofectamine 3000. Transfected cells were selected with blasticidin S at 20 µg/ml (Apexbio Technology LLC) for 3 days followed by blasticidin S at 10 µg/ml for 7 days. Cell cycle profiling using the FUCCI assay was performed in parental and *FAN1* KO cells +/- treated for 1 hour with 5 µM cisplatin, fixed with 4% paraformaldehyde for 10 min and imaged with Leica TCS SP8 confocal microscope (Leica Microsystems, Germany). Cells expressing tFucci(SA)5 appear red (expressing AzaleaB5-hCdt1(30/120)Cy(-)) when in G1, green (expressing h2-3-hGem(1/110)) when in late-S/G2/M-phases, and cells expressing both reporter genes and thus appearing orange were designated as being in late G1/early S, as reported<sup>4</sup>.

### **Flow cytometry analysis**

Low-confluence cultures of asynchronously growing *FAN1* KO hPTECs were treated with 5 µM cisplatin (Fresenius Kabi) for 1 h and then cultured for 24, 48 and 72 hours. Following trypsinization, cells were collected by centrifugation, washed in PBS, and fixed in 4% PFA, followed by permeabilization in 0.25% Tween for 10 minutes and staining in DAPI for 30 minutes. Cells were centrifuged, washed in PBS. Cells were analyzed by FACS using LSR

Fortessa™ (BD Biosciences, San Jose, CA). Cell cycle profiles were created using FlowJo analysis software (TreeStar Inc., Ashland, OR). Single cells were identified by measuring forward and side scatter, and cell doublets excluded by pulse area vs pulse width. For each condition 20,000 cells were analyzed by flow cytometry.

### **Antibodies**

Primary antibodies and lectins used in this study are shown in **Supplemental Table 4**. Secondary antibodies were donkey anti-rabbit Alexa Fluor 594, donkey anti-rabbit Alexa Fluor 488, donkey anti-mouse Alexa Fluor 594 or donkey anti-mouse Alexa Fluor 488 (all from Molecular Probes), and goat anti-rabbit IgG-HRP (sc-2004, Santa Cruz). Samples were mounted in ProlongGold (Molecular Probes) and images captured on a Leica TSC 5SP X confocal microscope (Leica Microsystems).

### **RNA Extraction and qRT-PCR**

qRT-PCR primers used in this study are shown in **Table 5**. RNA was isolated from mouse kidneys using Quick-RNA Miniprep kit (Zymo Research). 0.5 µg RNA was reverse transcribed using iScript (Bio-Rad). Quantitative real-time PCR was carried out using SYBRGreen Master Mix and run on a CFX96 Real-Time PCR System (Bio-Rad). The data were normalized to *Gapdh*.

### **RNA sequencing and data analysis**

RNA sequencing was performed on 4 experimental cohorts of mice, 1) ctrl (PBS), 2) Fan1KO (PBS), 3) ctrl (cisplatin), 4) *Fan1* KO (cisplatin); each cohort consisting of 2 male and 1 female mice. Cisplatin injury was induced as described above. Total RNA was isolated from one whole kidney from each mouse and sent for library preparation and sequencing to Genewiz (NJ, USA). Analysis of the RNA-seq data was performed at the University of Pittsburgh Center for Research Computing HTC cluster. Using the R programming language, RNA-seq FASTQ reads were first aligned to the *mm10* genome using Rsubread<sup>5</sup>, followed by featureCounts<sup>6</sup> read summarization and gene annotation. Statistical analysis of the RNA-seq data was performed using the limma-voom package<sup>7</sup> (Bioconductor). We used Benjamini-Hochberg multiple testing correction with an adjusted p-value < 0.05 to identify genes with statistically significant expression difference. Hierarchical distance clustering of the RNA-seq data was performed using Morpheus software (Broad Institute, Cambridge, MA). The Venn diagram in **Supplementary Figure**

**9B** was generated using the online tool VENNY (<http://bioinfogp.cnb.csic.es/tools/venny/index.html>). To generate the Venn diagram, we compared the cisplatin treated *Fan1* KO-cisplatin and ctrl-cisplatin differentially expressed genes with the previously published G1/S, G2/M and M cell cycle enriched gene sets <sup>8</sup>.

### **Western Blotting**

Kidney tissues or human kidney proximal tubule cells (hPTECs) were lysed in RIPA lysis buffer (Pierce) supplemented with Benzonase<sup>®</sup> Nuclease (Millipore Sigma) and homogenized with a sonicator. Cleared tissue lysates were produced by centrifugation of the resulting samples at 16,000 g for 30 minutes at 4°C. Gel electrophoresis of tissue lysates was performed using the NuPAGE system (Invitrogen). Samples were resolved on 4%–12% Bis-Tris gels and transferred onto PVDF membrane. Membranes were blocked with 5% milk in TBST and probed with primary and secondary antibodies respectively.

### **Subcellular Fractionation**

Subcellular fractionations were isolated using a subcellular fractionation kit (ThermoFisher Scientific, #78840) according to the manufacturer's instruction. The fractionated protein lysates were analyzed with western blotting using indicated antibodies (**Supplemental Table 4**).

### **Chromosomal spread analysis**

Chromosomal spread analysis was performed on parental and human FAN1KO kidney proximal tubular cells. In brief, cells were treated with 0.05 mg/ml Colcemid (Invitrogen, catalog no. 15210-016) for 1.5 hours prior to harvesting by trypsinization. The cell pellet was resuspended in 5 ml of 0.075 mM hypotonic KCl solution at 37°C for 20 minutes at 37°C. Cells were then fixed with freshly made 3:1 methanol/glacial acetic acid for 15 minutes and dropped onto microscope slides to obtain metaphase spreads. The slides were then stained with Giemsa (Gibco, #10092-013) for 5 minutes, washed briefly in tap water and air-dried.

## SUPPLEMENTARY FIGURES

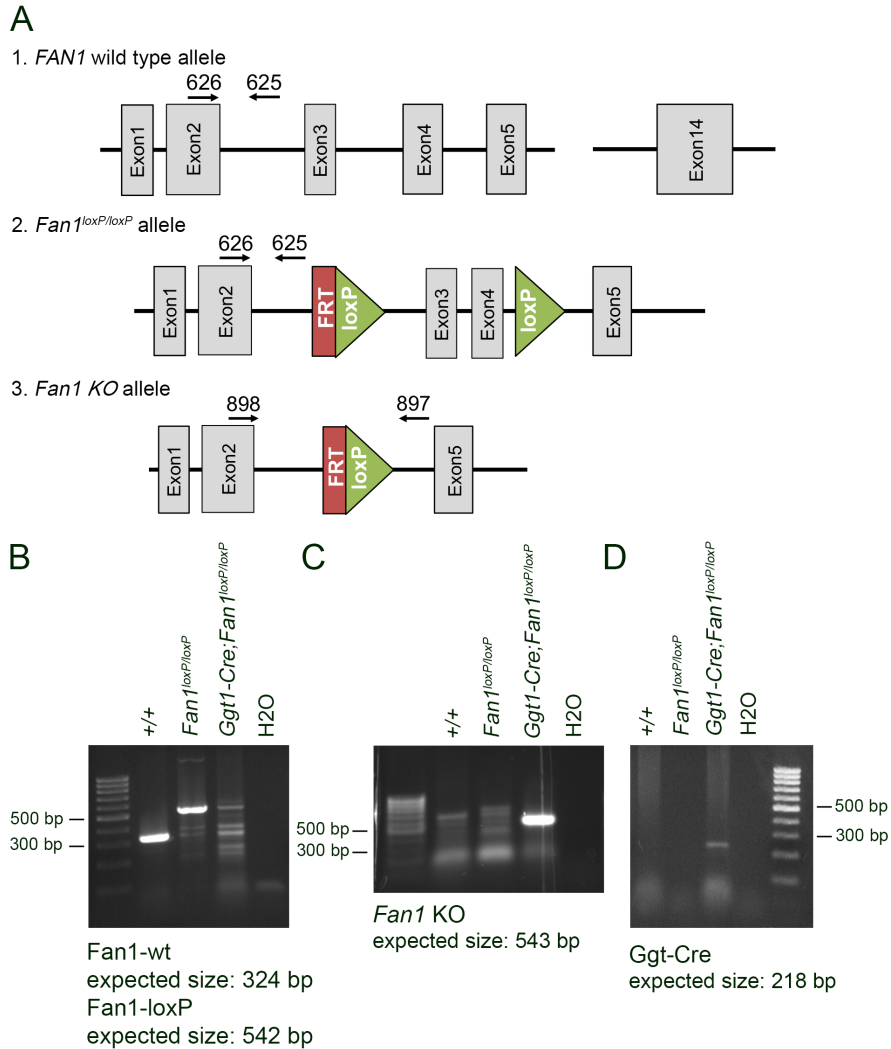

### Supplementary Figure 1. Overview of *Fan1*-alleles and genotyping results.

(A) Schematic demonstrating the various *Fan1*-alleles used in this study. Binding positions of the genotyping primers are indicated with arrows and numbers. FRT, flippase recognition target; loxP, loxP sequence.

(B) Genotyping details for detecting the *Fan1* wild type (wt) allele and *Fan1<sup>loxP</sup>*-allele from whole kidney lysates using primers 626 and 625 (see SFig. 1A). The *Fan1<sup>loxP</sup>*-allele (542 bp) is barely detectable in *Ggt1-Cre; Fan1<sup>loxP/loxP</sup>* kidney lysates due to recombination in proximal tubules.

(C) Genotyping details for detecting the *Fan1* KO-allele from whole kidney lysates using primers 898 and 897 (see SFig. 1A). The *Fan1* KO-allele is present only in *Ggt1-Cre; Fan1<sup>loxP/loxP</sup>* kidneys due to recombination.

(D) Genotyping details for detecting the *Ggt1-Cre*-allele from whole kidney lysates. The *Ggt1-Cre*-allele is present only in *Ggt1-Cre; Fan1<sup>loxP/loxP</sup>* kidneys.

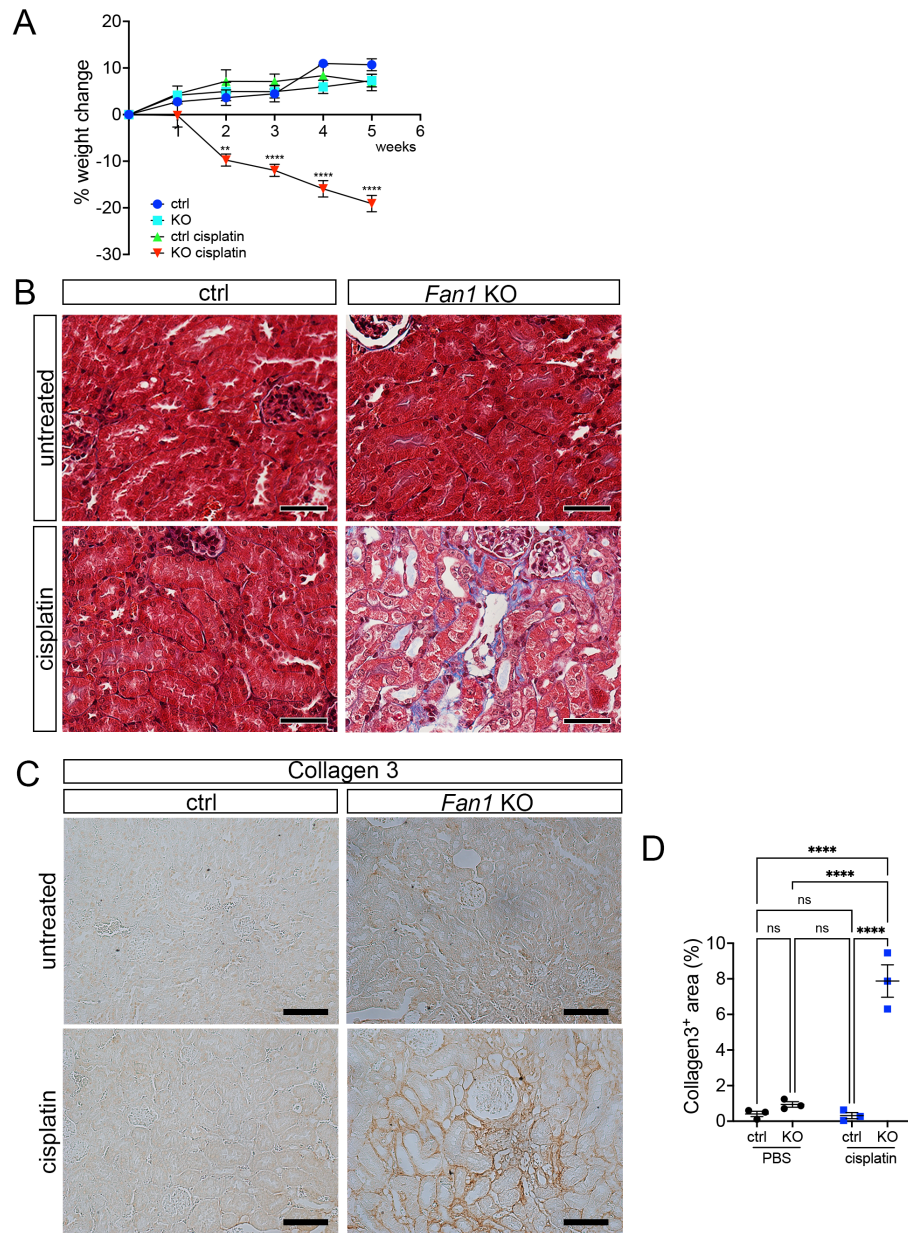

**Supplementary Figure 2. Repeated low dose cisplatin administration induces fibrogenesis in *Fan1* KO kidneys but not in control kidneys.**

(A) Change in weekly body weight in untreated and cisplatin treated ctrl and *Fan1* KO mice compared to the initial body weight at the onset of experiment. Significant loss in body weight was observed between PBS treated ctrl and cisplatin treated *Fan1* KO mice. Data are expressed as mean  $\pm$  SEM; n is the number of mice. n=5 for all groups, \*\*p<0.01, \*\*\*\*p<0.0001. 2-way ANOVA with Tukey's post hoc test.

(B) Masson's trichrome staining in control and *Fan1* KO kidneys after repeated low dose cisplatin (2 mg/kg) administration. Untreated control, cisplatin-treated control and *Fan1* KO kidneys appear histologically normal, whereas cisplatin *Fan1* KO kidneys stain with blue, a characteristic sign of tubular interstitial fibrosis. Scale bars 50  $\mu$ m.



(C) Representative images of immunohistochemical staining of collagen III in untreated and cisplatin treated kidneys. n = 3 for untreated controls and cisplatin treated animals. Scale bar 100  $\mu$ m.

(D) Quantification of collagen 3 expression in 6 random cortical areas in untreated and cisplatin treated control and *Fan1* KO kidneys. Data are expressed as mean  $\pm$  SEM; n is the number of mice. n=3 for all groups, \*\*\*\*p<0.0001. 2-way ANOVA with Tukey's post hoc test.

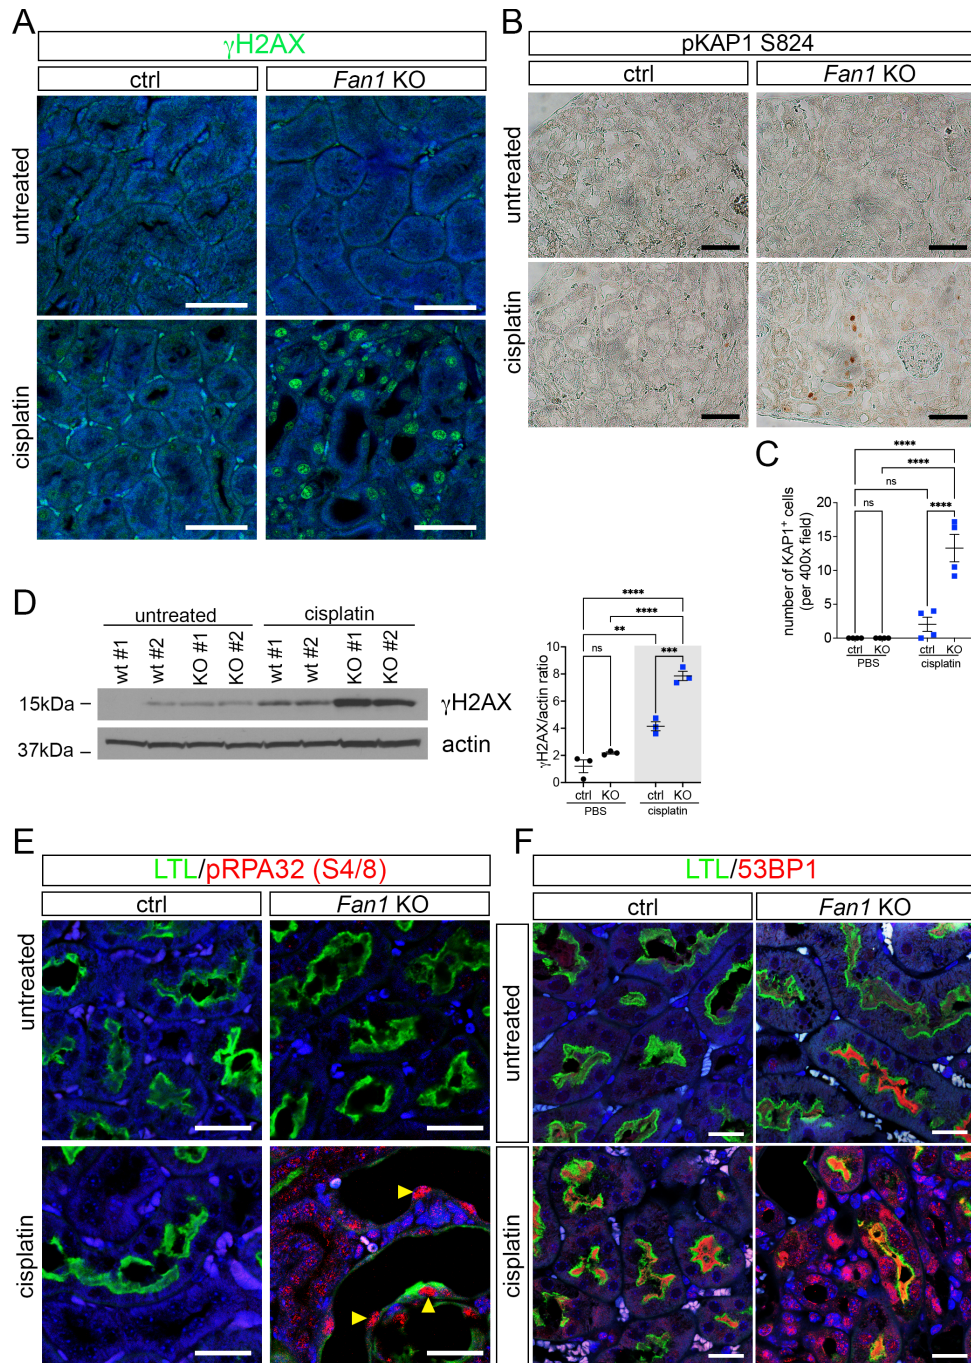

**Supplemental Figure 3. Increased expression of DNA damage markers in *Fan1* KO kidneys after cisplatin injury.**

(A) Mice were subjected to repeated low dose cisplatin administration weekly for 5 weeks and kidneys examined 1 week after the last dose. Phosphorylated H2AX at S135 ( $\gamma$ H2AX) was detected using immunofluorescence staining.  $\gamma$ H2AX expression is greatly increased in the PTECs of *Fan1* KO kidneys after cisplatin compared to control kidneys. Scale bar 50  $\mu$ m.

**(B)** Increased levels of the ATM target phosphorylated KAP1 (S824) in *Fan1* KO kidneys 1 week after the last cisplatin injection compared to the kidneys in other experimental groups. Scale bar 50  $\mu\text{m}$ .

**(C)** Quantification of the number of pKAP1(S824)-positive cells in 6 random cortical areas in untreated and cisplatin treated control and *Fan1* KO kidneys shows significant upregulation in *Fan1* KO kidneys after cisplatin compared to kidneys in other experimental cohorts. Data are expressed as mean  $\pm$  SEM; n is the number of mice. n=4 for all groups, \*\*\*\*p<0.0001. 2-way ANOVA with Tukey's post hoc test.

**(D)** Representative image of western blot analysis of  $\gamma\text{H2AX}$  expression in cisplatin treated *Fan1* KO kidneys. Actin is a loading control. Densitometric analysis of  $\gamma\text{H2AX}$  western blot band intensities demonstrates significant increase in the level of DNA damage in cisplatin treated *Fan1* KO kidneys compared to other experimental cohorts. Data are expressed as mean  $\pm$  SEM; n is the number of mice. n=3 for all groups, \*\*p<0.01, \*\*\*\*p<0.0001. 2-way ANOVA with Tukey's post hoc test.

**(E)** Immunofluorescence staining of pRPA32 (S4/8) (yellow arrowheads), which marks single strand DNA, an indicator of replication stress, is increased in cisplatin treated *Fan1* KO kidneys, but not in control kidneys. Lotus lectin (LTL) labels proximal tubules. Scale bar 25  $\mu\text{m}$ .

**(F)** Immunofluorescence staining of 53BP1, which marks DNA double-strand breaks is increased in cisplatin treated *Fan1* KO kidneys, but not in control kidneys. Lotus lectin (LTL) labels proximal tubules. Scale bar 25  $\mu\text{m}$ .

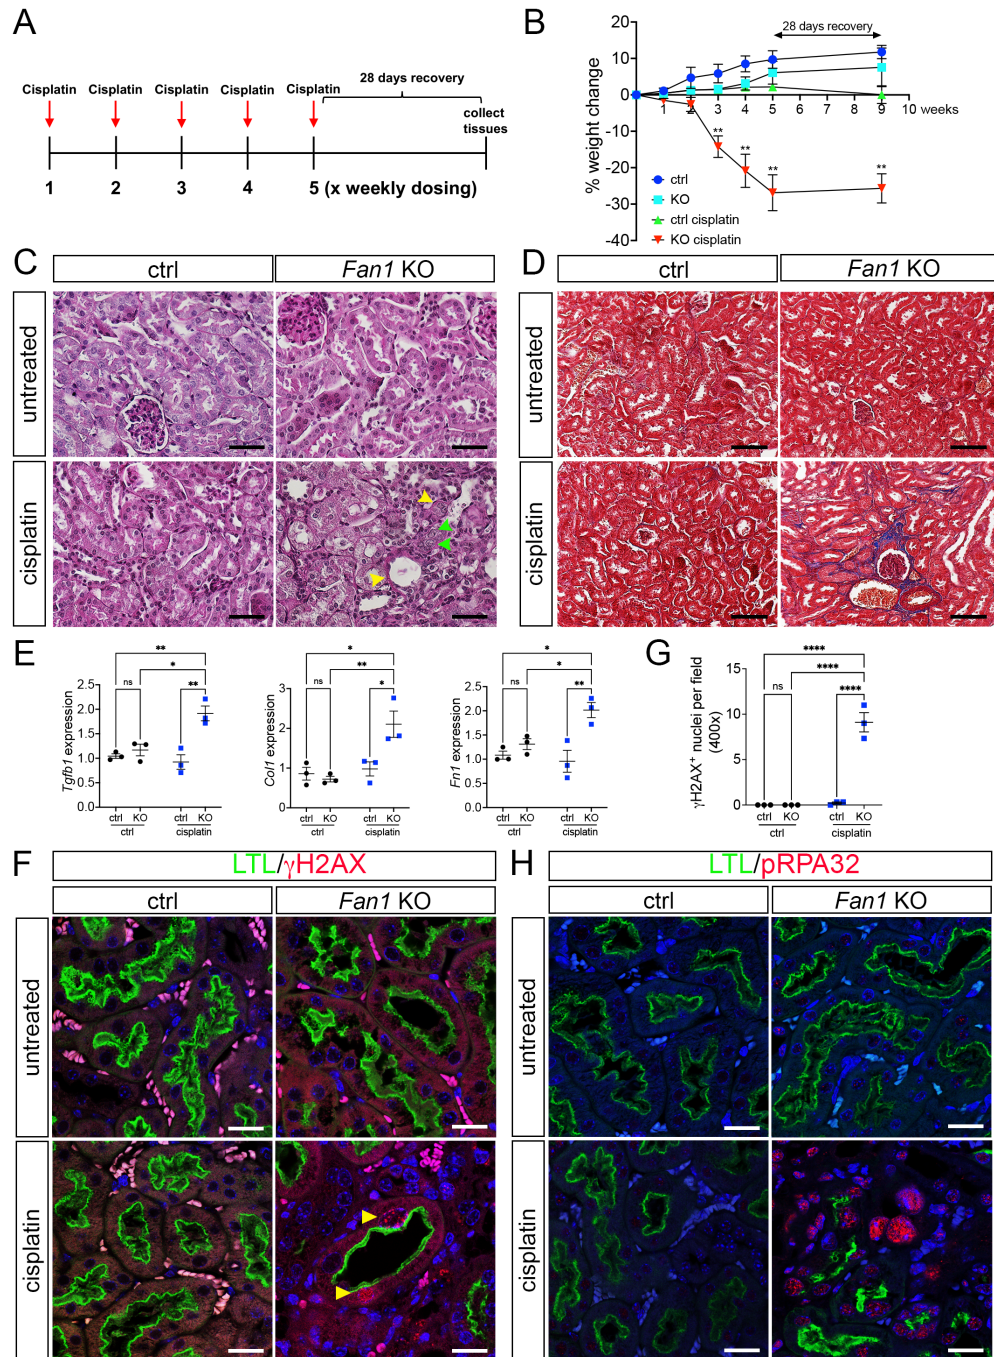

**Supplemental Figure 4. *Fan1* KO kidneys fail to repair long-term tubular cell DNA damage.**

(A) Schematic diagram of the long-term recovery protocol after repeat low dose cisplatin administration.

(B) Post cisplatin recovery is associated with sustained weight loss in *Fan1* KO mice but not in ctrl mice. Animal weights were recorded weekly and compared with their body weights before cisplatin injection to calculate weight loss percentages. Data are expressed as mean  $\pm$  SEM; n is the number of mice. n=3 for all groups, \*\*p<0.01. 2way ANOVA with Tukey's post hoc test.

(C) PAS staining reveals persistent presence of karyomegalic nuclei (green arrowheads) and basement membrane defects (yellow arrowheads) in cisplatin treated *Fan1* KO kidneys after 28 days of recovery. Scale bar 50  $\mu\text{m}$ .

(D) Masson's trichrome staining shows interstitial fibrosis in *Fan1* KO kidneys 28 days after cisplatin administration. No fibrosis is detectable in cisplatin treated control kidneys. Scale bar 100  $\mu\text{m}$ .

(E) qPCR analysis of fibrosis markers *Tgfb1*, *Col1* and *Fn1* in control and cisplatin treated kidneys. Data are expressed as mean  $\pm$  SEM; n is the number of mice. n=3 for all groups, \*p<0.05, \*\*p<0.01, 2-way ANOVA with Tukey's post hoc test.

(F) Immunofluorescence staining against  $\gamma\text{H2AX}$  (yellow arrowheads) reveals failed DNA repair in *Fan1* KO kidneys 28 days after cisplatin administration. Scale bar 20  $\mu\text{m}$ .

(G) Quantification of  $\gamma\text{H2AX}$ -positive cells in *Fan1* KO kidney cortical areas in a random field of 400x magnification shows  $9.1\pm 1.1$  cells in *Fan1* KO vs.  $0.2\pm 0.1$  cells in control kidneys. Data are expressed as mean  $\pm$  SEM; n is the number of mice. n=3 for all groups, \*\*\*\*p<0.0001. 2way ANOVA with Tukey's post hoc test.

(H) Immunofluorescence staining against pRPA32 (S4/8) (red) marks the nuclei with persistent replication stress in *Fan1* KO kidneys 28 days after cisplatin administration. Scale bar 20  $\mu\text{m}$ .

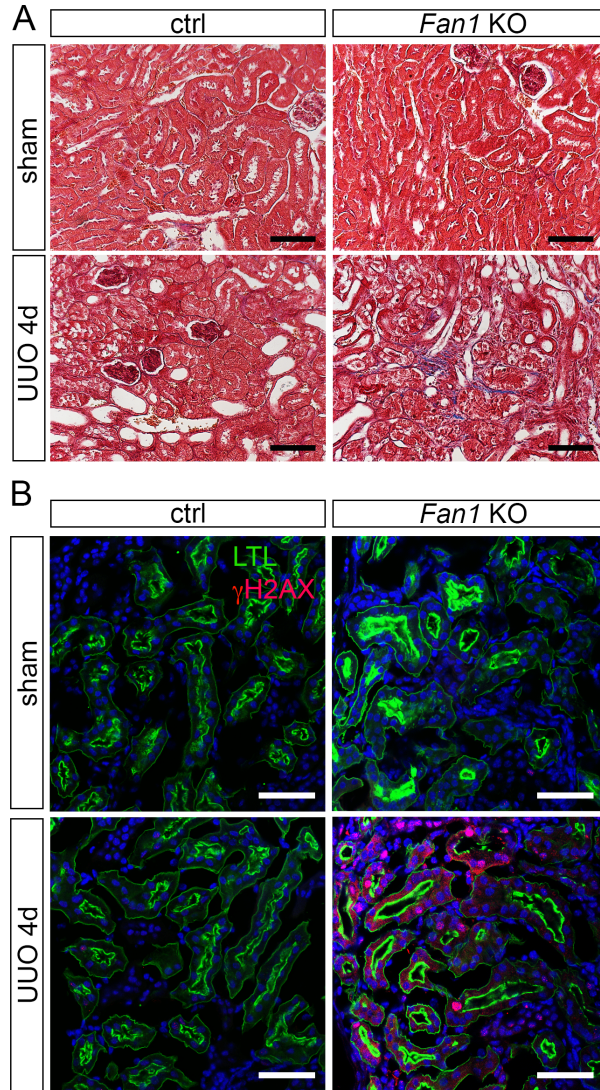

**Supplementary Figure 5. Increased fibrosis and DNA damage in *Fan1* KO kidneys after 4 days of UUO.**

(A) Masson's trichrome staining reveals the development of interstitial fibrosis in *Fan1* KO kidneys after 4 days of UUO. No fibrosis is detectable at this early stage in UUO control kidneys. Scale bar 100  $\mu$ m.

(B) Immunofluorescence staining with antibodies against  $\gamma$ H2AX and the proximal tubular marker Lotus lectin (LTL) demonstrate numerous  $\gamma$ H2AX-positive nuclei in the proximal tubules of *Fan1* KO kidneys after 4 days of UUO, whereas none can be detected in control UUO kidneys at this stage. Scale bar 50  $\mu$ m.

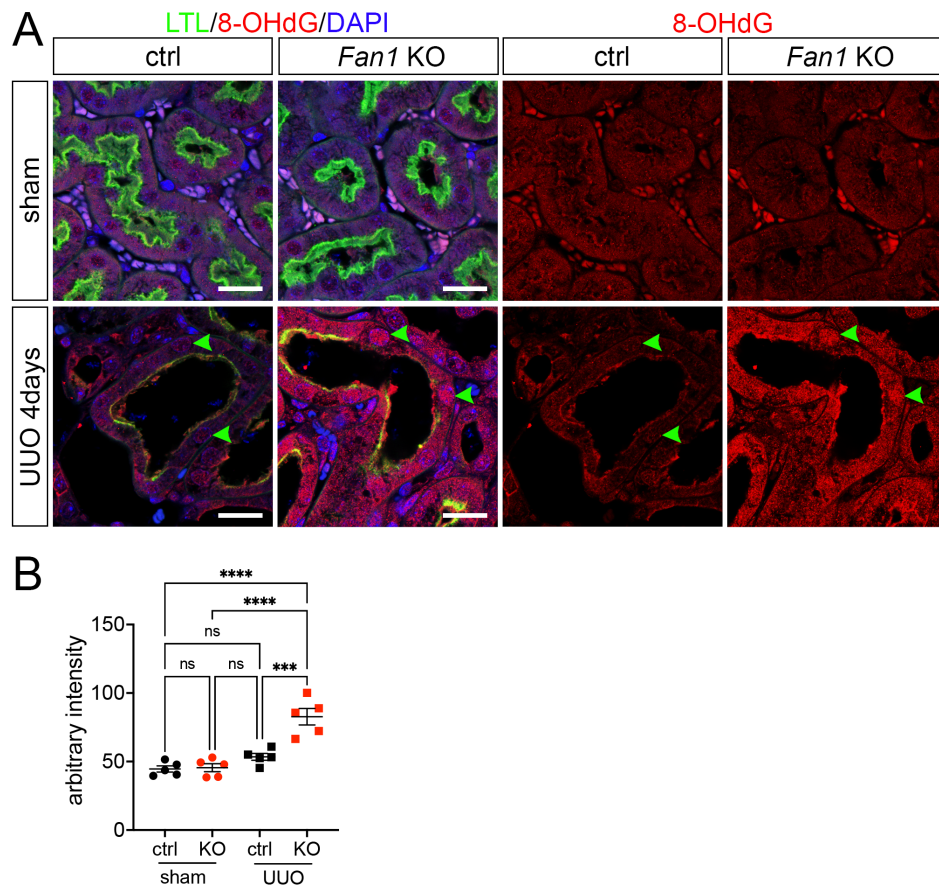

**Supplementary Figure 6. Increased levels of oxidative DNA damage in *Fan1* KO kidneys after 4 days of UUO.**

(A) Immunofluorescence staining with antibodies against 8-OHdG and the proximal tubular marker Lotus lectin (LTL) show increased levels of oxidative DNA damage in the nuclei (green arrowheads) of the proximal tubule cells in *Fan1* KO kidneys after 4 days of UUO, compared to control kidneys. Scale bar 20  $\mu$ m.

(B) Quantification of 8-OHdG staining intensity in the PTEC nuclei of sham and UUO control and *Fan1* KO kidneys imaged from 6 random cortical areas. Data are expressed as mean  $\pm$  SEM; n is the number of mice. n=5 for all groups, \*\*\*p<0.001, \*\*\*\*p<0.0001. 2-way ANOVA with Tukey's post hoc test.

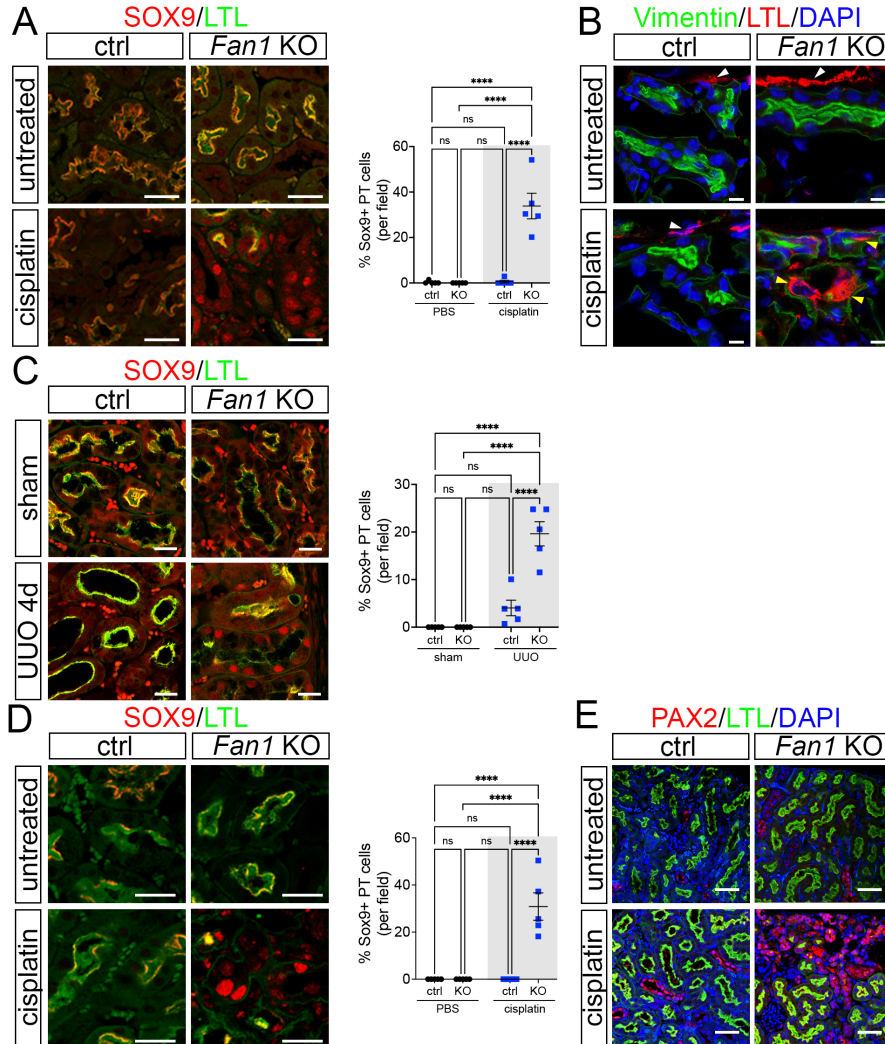

**Supplementary Figure 7. Sox9 expression is upregulated in *Fan1* KO kidneys after injury.**

(A) Repeat low dose cisplatin administration leads to increased SOX9 (red) expression in *Fan1* KO compared to control kidneys. 33.8% ± 5.6% of *Fan1* KO proximal tubule cells are positive for SOX9 compared to 0.6% in control kidneys. Scale bar 25 μm.

(B) Repeat low dose cisplatin administration induces aberrant vimentin (red) expression in *Fan1* KO proximal tubule cells (yellow arrowhead) and not in control kidneys. White arrowhead indicates normal vimentin staining in the renal capsule cells. Scale bar 7.5 μm.

(C) UUO leads to increased SOX9 (red) expression in *Fan1* KO compared to control kidneys 4 days after ureter ligation. 18.8% ± 2.2% of *Fan1* KO proximal tubule cells are positive for SOX9 compared to 3.5% ± 1.4% cells in control kidneys. Scale bar 10 μm.

(D) SOX9 (red) high expression is maintained in the proximal tubule cells in *Fan1* KO kidneys after long term recovery from repeat low dose cisplatin administration. 30.9% ± 5.8% of *Fan1* KO proximal tubule cells are positive for SOX9 compared to 0% in control kidneys. Scale bar 50 μm.



(E) PAX2 (red) is expressed in the proximal tubule cells in *Fan1* KO kidneys after long term recovery from repeat low dose cisplatin administration. Scale bar 50  $\mu\text{m}$ .

(A,C,D) Data are expressed as mean  $\pm$  SEM; n is the number of mice. n=5 for all groups, \*\*\*p<0.001, \*\*\*\*p<0.0001. 2-way ANOVA with Tukey's post hoc test.

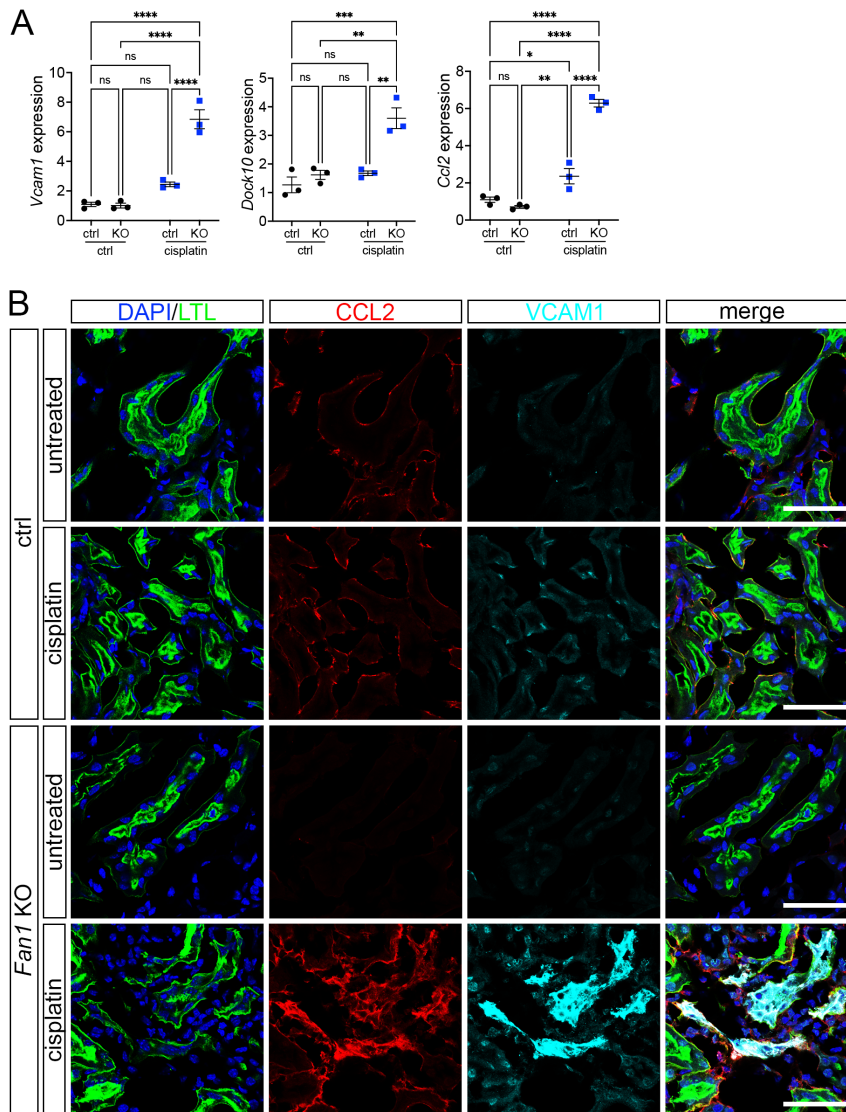

**Supplementary Figure 8. Markers of failed tubular repair, VCAM1 and CCL2 are upregulated in *Fan1* KO kidneys 28 days after cisplatin injury.**

(A) qPCR analysis shows that *Vcam1*, *Dock10* and *Ccl2* expression is upregulated in *Fan1* KO kidneys after cisplatin injury, *Vcam1* (ctrl  $1.0 \pm 0.1$  vs *Fan1* KO  $2.1 \pm 0.2$ , \*\*\*\* $p < 0.001$ ), *Dock10* (ctrl  $9.7 \pm 1.3$  vs *Fan1* KO  $29.4 \pm 4.4$ , \*\*\*\* $p < 0.01$ ) and *Ccl2* (ctrl  $9.7 \pm 1.3$  vs *Fan1* KO  $29.4 \pm 4.4$ , \*\*\*\* $p < 0.01$ ),  $n = 3$  each. Data are expressed as mean  $\pm$  SEM, \* $p < 0.05$ , \*\* $p < 0.01$ , \*\*\* $p < 0.001$ , \*\*\*\* $p < 0.0001$ . 2-way ANOVA with Tukey's post hoc test.

(B) Immunofluorescence staining with antibodies against CCL2 (red), VCAM1 (magenta) and the proximal tubular marker Lotus lectin (LTL) (green) show overlapping expression of VCAM1 and CCL2 in the injured proximal tubule cells in *Fan1* KO kidneys, consistent with failed tubular repair, compared to control kidneys. Scale bars 20  $\mu\text{m}$ .

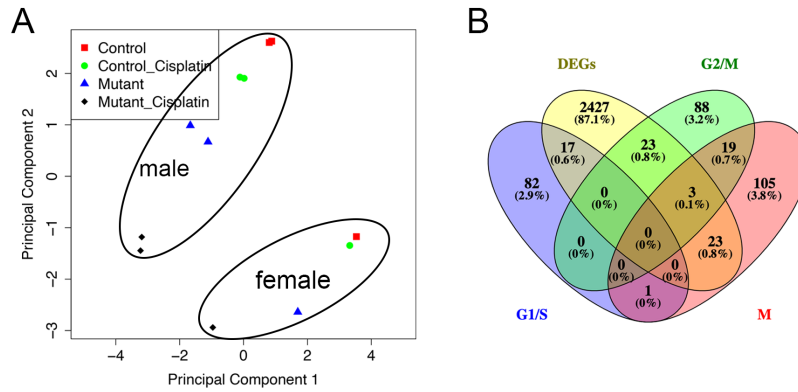

**Supplementary Figure 9. Principal component analysis reveals *Fan1*- and gender-dependent differences in mouse kidneys after cisplatin injury.**

**(A)** Principal component analysis showed that the kidney transcriptome was more similar in control mice even after cisplatin injury and was more distantly related to the transcriptome of *Fan1* KO kidneys. Regardless of +/- cisplatin treatment or genotype, the kidney transcriptomes were relatively dissimilar between male and female mice.

**(B)** Venn diagram indicating the number of significant differentially expressed genes across cell cycle phases (G1/S, G2/M and M) and the overlap between each set of genes in cisplatin treated *Fan1* KO kidneys. Notice, the overrepresentation of G2/M specific genes in injured *Fan1* KO kidneys compared to other cell cycle phases.

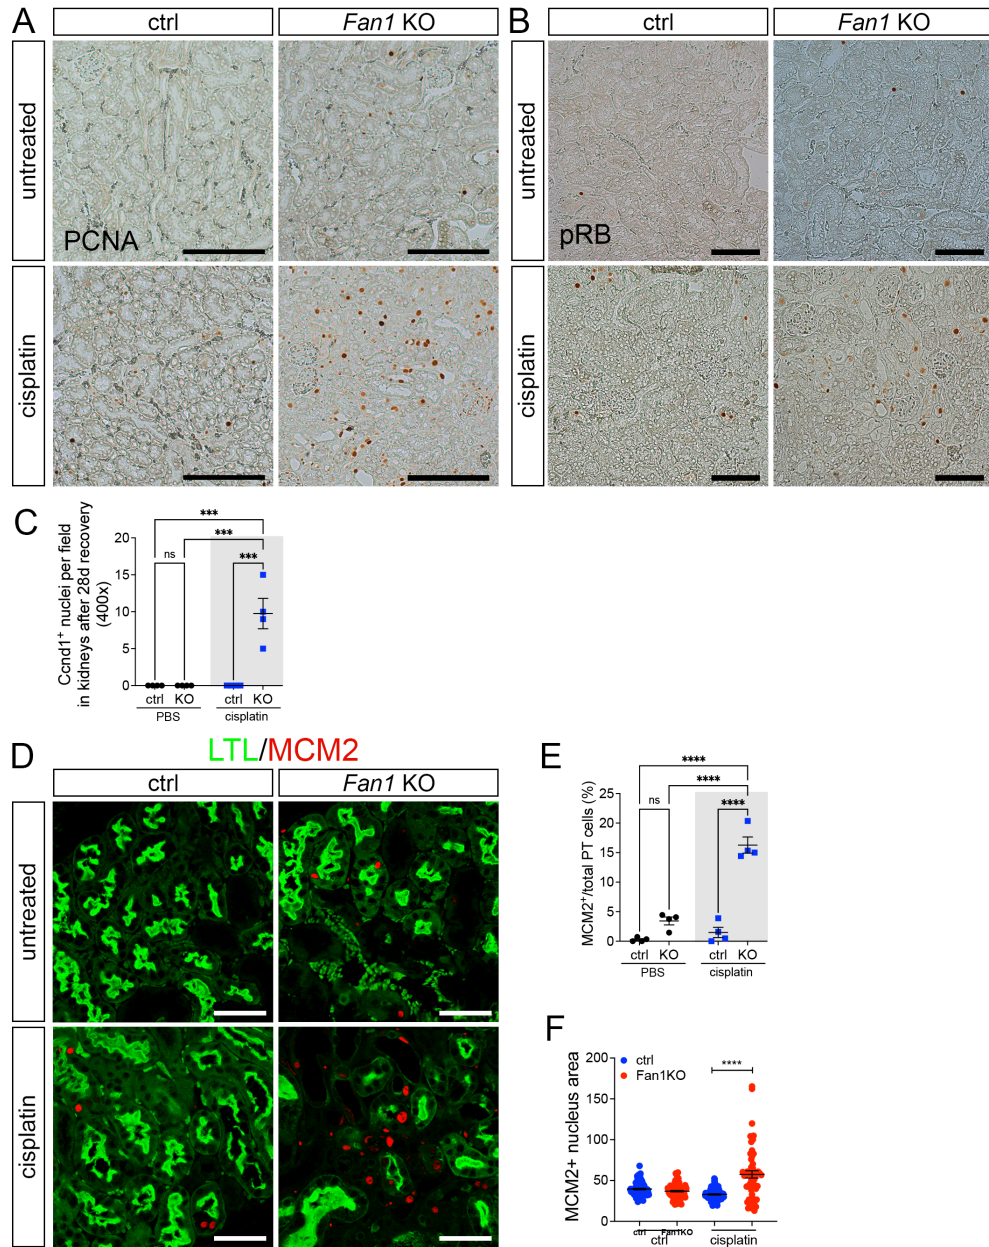

**Supplementary Figure 10. Cell cycle proliferation markers are upregulated in cisplatin treated *Fan1* KO kidneys.**

(A) Immunohistochemical staining for PCNA in untreated and cisplatin treated kidneys. Scale bar 200  $\mu$ m.

(B) Immunohistochemical staining for phosphorylated pRB (S807/811) in untreated and cisplatin treated kidneys. Scale bar 100  $\mu$ m.

(C) Quantification of CCND1+ nuclei in *Fan1* KO kidneys 28 days after cisplatin injury. There are  $9.8 \pm 2.0$  CCND1+ nuclei per field (400x) in *Fan1* KO kidneys compared to none in other groups, \*\*\* $p < 0.001$ ,  $n = 4$ .

(D) Immunostaining for MCM2 and LTL in untreated and cisplatin treated kidneys. Scale bar 50  $\mu$ m.

(E) Quantification of MCM2+ nuclei 16.3%  $\pm$  1.4% of *Fan1* KO proximal tubule cells are positive for MCM2 compared to 1.5  $\pm$  0.9% in control kidneys. \*\*\*\* $p < 0.0001$ ,  $n = 4$ .

(F) Quantification of the area of MCM2+ nuclei in untreated and cisplatin treated kidneys. Nuclear area in cisplatin treated ctrl kidneys  $33.0 \pm 0.7$  vs  $57.5 \pm 4.4$  in cisplatin treated *Fan1* KO kidneys, \*\*\*\* $p < 0.0001$ , n=100 MCM2+ nuclei in ctrl kidneys and n=55 MCM2+ nuclei in *Fan1* KO kidneys.

(A,C,D) Data are expressed as mean  $\pm$  SEM; n is the number of mice. n=5 for all groups, \*\*\* $p < 0.001$ , \*\*\*\* $p < 0.0001$ . 2-way ANOVA with Tukey's post hoc test.

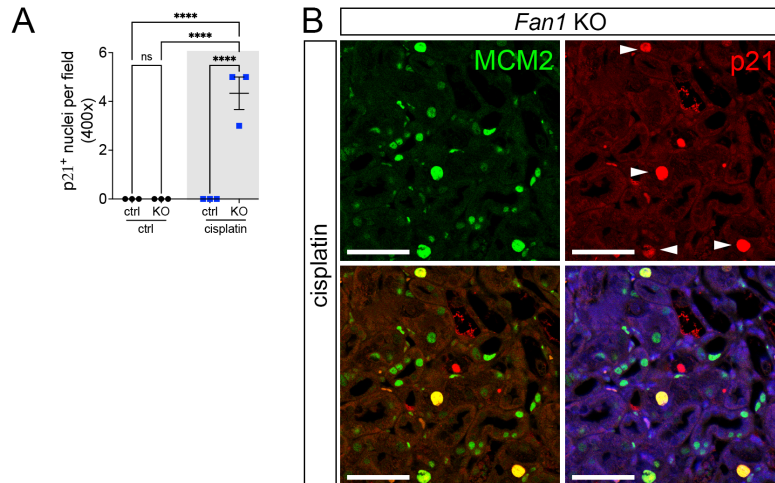

**Supplementary Figure 11. Persistent DNA damage leads to abnormal co-expression of p21 and MCM2 in *Fan1* KO kidneys.**

(A) Quantification of p21+ nuclei per 400X field in untreated and cisplatin treated kidneys.  $4.3 \pm 0.7$  p21+ nuclei per field in *Fan1* KO kidneys, \*\*\*\* $p < 0.0001$ ,  $n = 3$ . Data are presented as the mean  $\pm$  SEM. A 2-way ANOVA with Tukeys' post hoc analysis.

(B) Immunostaining for MCM2 and LTL in cisplatin treated *Fan1* KO kidneys. White arrows indicate nuclei in which MCM2 and p21 overlap. Scale bar 50  $\mu$ m.

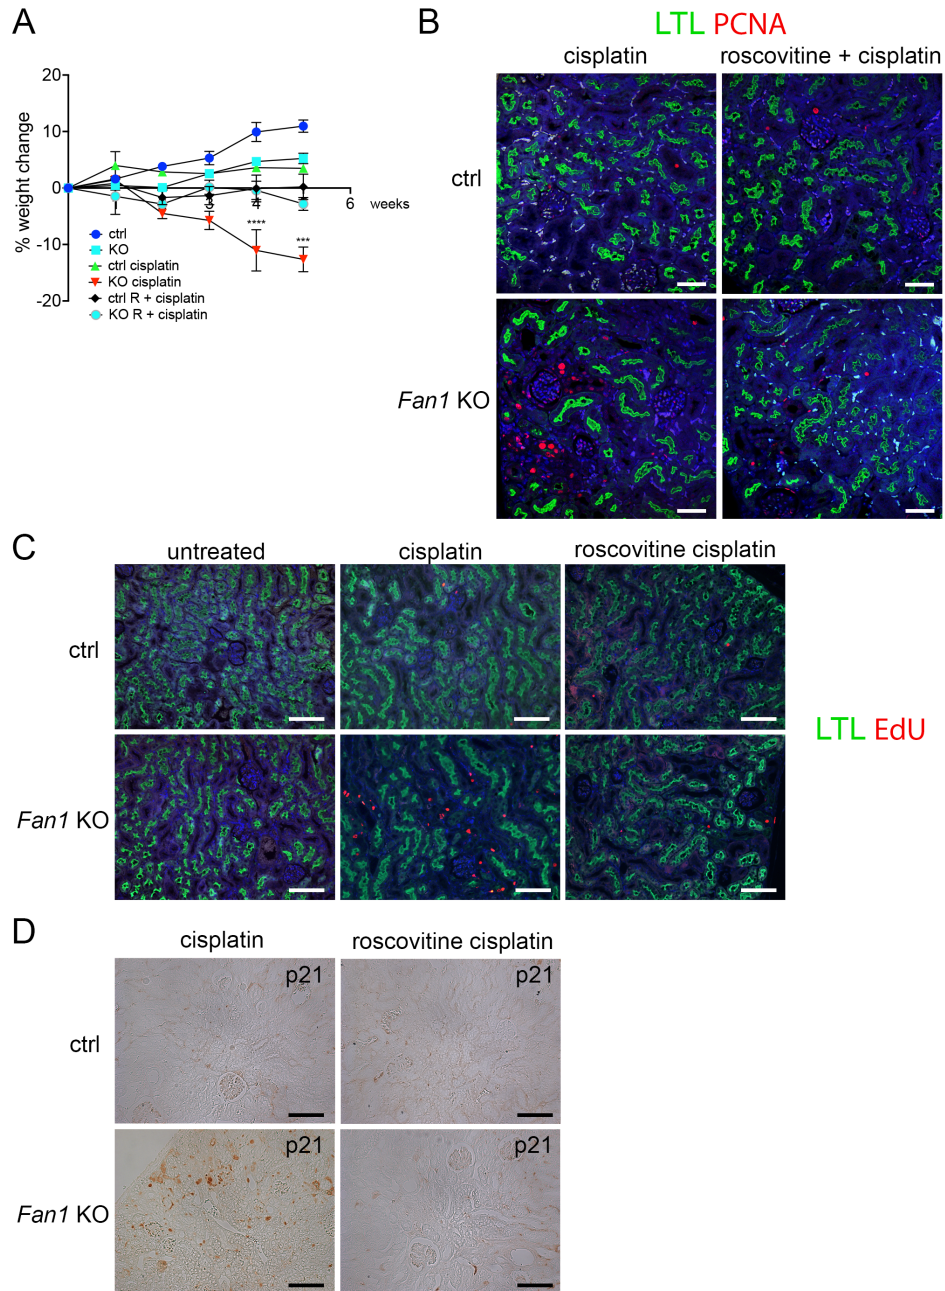

**Supplementary Figure 12. Roscovitine treatment blocks S phase activity in *Fan1* KO kidneys.**

(A) Roscovitine treatment before cisplatin administration protects *Fan1* KO mice from weight loss. Animal weights were recorded weekly and compared with their body weights before cisplatin injection to calculate weight loss percentages. Data are expressed as mean  $\pm$  SEM; n is the number of mice. n=4 for all groups, \*\*\*p<0.001, \*\*\*\*p<0.0001. 2way ANOVA with Tukey's post hoc test.

(B) Representative images of PCNA immunofluorescence staining in cisplatin and roscovitine + cisplatin treated kidneys. LTL (green) staining marks proximal tubules. Scale bar 50  $\mu$ m.

**(C)** Representative images of EdU (red) detection with click chemistry in cisplatin and roscovitine + cisplatin treated kidneys. LTL (green) staining marks proximal tubules. Scale bar 100  $\mu\text{m}$ .

**(D)** Representative images of p21 immunohistochemistry staining in cisplatin and roscovitine + cisplatin treated kidneys. In contrast to mice treated only with cisplatin, the kidneys of roscovitine + cisplatin treated mice did not contain any p21-positive nuclei. Scale bar 100  $\mu\text{m}$ .



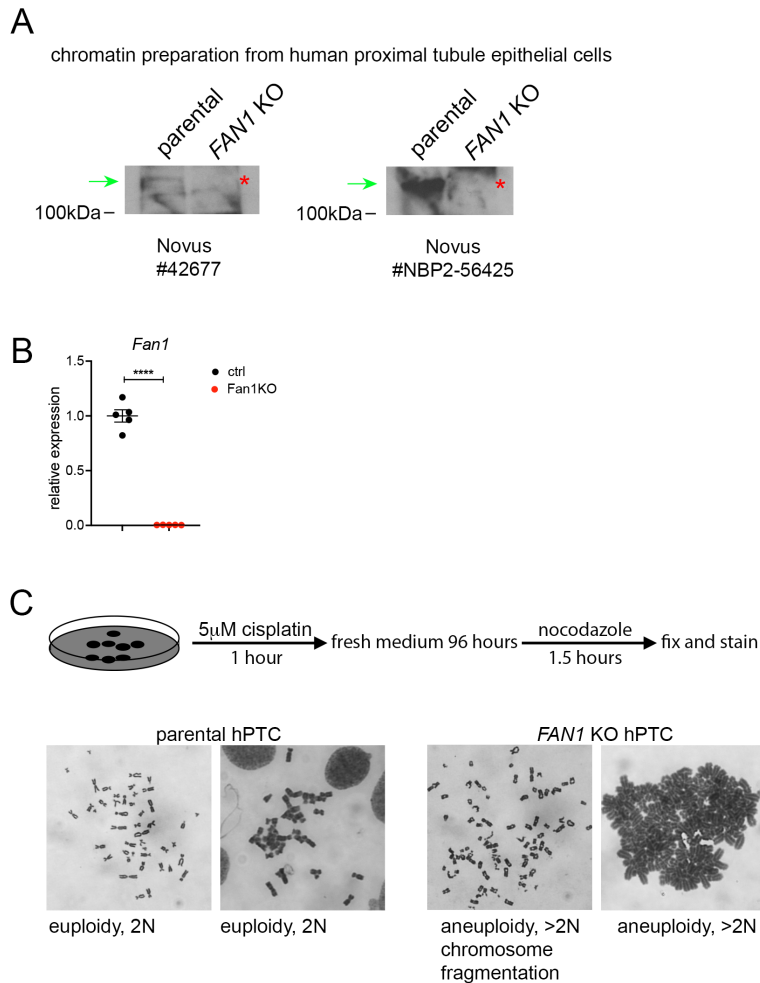

**Supplementary Figure 13. Confirmation of loss of FAN1 expression in human FAN1 KO CRISPR/Cas9 kidney proximal tubule cells.**

(A) Absence of FAN1 expression in human PTECs was confirmed by immunoblotting of the chromatin fraction from the parental and *FAN1* KO cells with antibodies against FAN1. #42677 (Novus) anti-FAN1 antibodies detect the residues 1-50 in FAN1 N-terminus, #NBP2-56425 (Novus) detects the FAN1 C-terminus. Green arrow indicates the FAN1 protein band in the parental chromatin extractions; red star indicates absence of FAN1 band in FAN1KO extracts.

(B) qPCR analysis of human PTECs with primers against *FAN1* confirm the absence of *FAN1* mRNA transcript in KO CRISPR/Cas9 kidney proximal tubule cells. \*\*\*\* $p < 0.0001$ ,  $n = 5$  biological replicates. Data are presented as the mean  $\pm$  SEM. Two-tailed, unpaired Student's t test.

(C) Examples of metaphase spreads of parental and *FAN1* KO human proximal tubule cell lines 96 hours after 1 hour exposure to 5  $\mu$ M cisplatin. *FAN1* KO hPTCs demonstrate aneuploidy and chromosomal fragmentation.

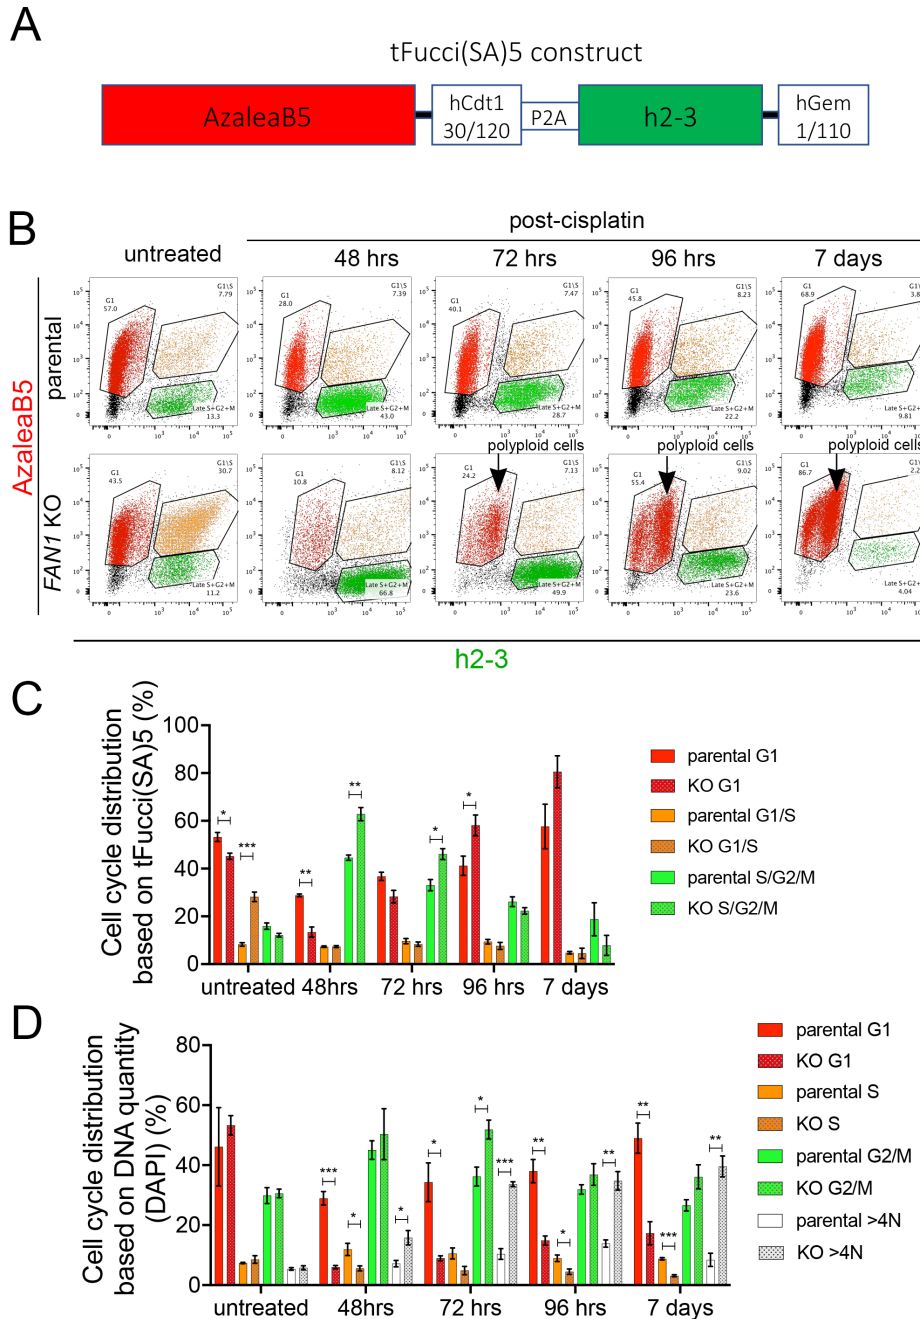

**Supplementary Figure 14. Fucci assay combined with FACS reveals a distinct polyploid cell population in *FAN1* KO hPTECs.**

(A) Schematics of the tandem Fucci variant, tFucci(SA)5. hGem(1/110), APC<sup>Cdh1</sup>-mediated ubiquitination domain (1–110) of human Geminin; hCdt1, residues 30–120 of human Cdt1; P2A, self-cleaving peptide.

(B) Gating strategy of parental and *FAN1* KO hPTECs to identify different cell cycle phases based on their expression of red (AzaleaB5(+)/h2-3(-)), yellow (AzaleaB5(+)/h2-3(+)), or green (AzaleaB5(-)/h2-3(+)) fluorescence. A panel with representative data from parental and *FAN1* KO hPTECs is shown.

(C) Cell cycle distribution of parental and *FAN1* KO hPTECs based on tFucci(SA) expression. \* $p < 0.05$ , \*\* $p < 0.01$ , \*\*\* $p < 0.001$ ,  $n = 3$  replicates each. Data are presented as mean  $\pm$  SEM. Two-tailed, unpaired Student's t test.

(D) Cell cycle distribution of parental and *FAN1* KO hPTECs based on DNA content (cellular ploidy) was determined by flow cytometry based on DAPI staining. \* $p < 0.05$ , \*\* $p < 0.01$ , \*\*\* $p < 0.001$ ,  $n = 3$  replicates each. Data are presented as mean  $\pm$  SEM. Two-tailed, unpaired Student's t test.

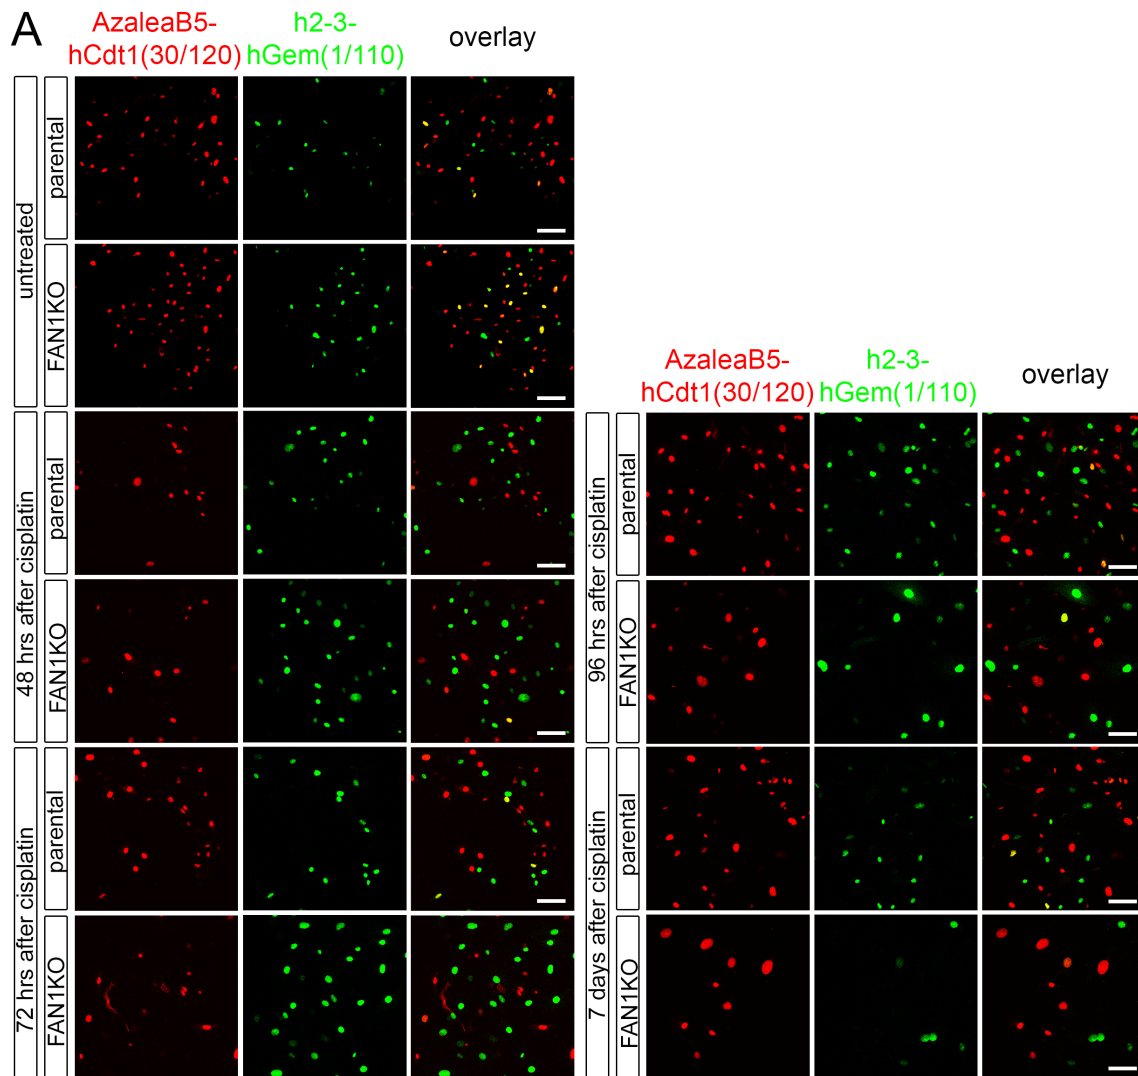

**Supplementary Figure 15. Fucci assay can be used to monitor polyploidization in *FAN1* KO hPTECs.**

(A) Representative microscopic images of parental and *FAN1* KO hPTECs stably expressing the tFucci(SA)5 construct. Cells appearing red (expressing AzaleaB5-hCdt1(30/100)) were designated as being in G1, cells appearing green (expressing h2-3-hGem(1/110)) were designated as being in late-S/G2/M, and cell expressing both reporter genes and thus appearing orange were designated as being in G1/S. Cells were +/- treated for 1 hr with 5 $\mu$ M cisplatin and imaged 48, 72, 96 hours or 7 days later. The parental cells appear to reacquire their baseline-like expression pattern of tFucci(SA)5 by day 7 after treatment with cisplatin. In contrast, the majority of the *FAN1* KO cells have an increased nuclear size, indicating polyploidy, and appear red, suggesting that they are quiescent. Scale bars 100  $\mu$ m.

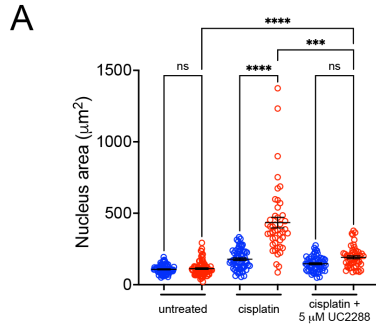

**Supplementary Figure 16. Inhibiting *Cdkn1a* expression blocks karyomegaly in human *FAN1* KO CRISPR/Cas9 kidney proximal tubule cells.**

(A) Quantification of the nucleus area of *FAN1* KO hPTC cells vs the parental cell line in untreated, cisplatin treated and cisplatin + UC2288 treated cells 48 hours after 1 hour 5 µM cisplatin treatment reveals that inhibiting *Cdkn1a* expression with 5 µM UC2288 blocks the formation of karyomegaly in *FAN1* KO hPTC cells. DAPI staining was used to measure the nuclear area. \*\*\* $p < 0.001$ , \*\*\*\* $p < 0.0001$ ,  $n = 100$  nuclei per each condition. Data are presented as the mean  $\pm$  SEM, non-parametric Kruskal-Wallis test.

**Supplementary Table 1. Differentially expressed genes between untreated control and untreated *Fan1* KO kidneys.**

| <b>GeneID</b> | <b>Symbol</b> | <b>logFC</b> | <b>adj.P.Val</b> |
|---------------|---------------|--------------|------------------|
| 217066        | Gm15698       | -7.0716751   | 5.07E-06         |
| 207565        | Camkk2        | -1.382912    | 0.00013177       |
| 613254        | AA465934      | -2.9937482   | 0.00081794       |
| 11837         | Rplp0         | 1.60775726   | 0.00081794       |
| 66161         | Pop4          | 1.80011044   | 0.00081794       |
| 399609        | C130046K22Rik | 6.49196598   | 0.00081794       |
| 193217        | BC018473      | -8.2480059   | 0.00119904       |
| 64213         | St7           | -1.3242798   | 0.00160507       |
| 67704         | 1810037117Rik | -3.5019978   | 0.00160507       |
| 329002        | Zfp236        | 0.84131029   | 0.00162906       |
| 100504344     | Gm20186       | 2.84026187   | 0.00208155       |
| 435784        | Rps15a-ps8    | -8.6076967   | 0.00208155       |
| 14455         | Gas5          | 1.2310201    | 0.00233869       |
| 18704         | Pik3c2a       | 0.97852923   | 0.00233869       |
| 433855        | Al506816      | 4.31247131   | 0.00233869       |
| 20445         | St6galnac1    | -5.747616    | 0.00233869       |
| 435328        | Ighv1-67      | -3.7120647   | 0.00287733       |
| 68695         | Hddc3         | -2.3618628   | 0.00305406       |
| 231287        | Atp10d        | -2.1792889   | 0.00379563       |
| 240058        | Cpne5         | -4.2994287   | 0.00379563       |
| 56747         | Sez6l         | -4.0307034   | 0.00379563       |
| 234825        | Klhdc4        | 1.28494798   | 0.00540393       |
| 11431         | Acp1          | 1.93530916   | 0.00601462       |
| 75472         | Cfap126       | 3.79948385   | 0.00630441       |
| 100502888     | Gm19434       | 5.30433721   | 0.00646006       |
| 27384         | Akr1c13       | -1.0476202   | 0.00652959       |
| 75986         | Agmat         | -1.3601324   | 0.00659294       |
| 622070        | Gm15133       | 4.11056769   | 0.00659294       |
| 66526         | Tceanc2       | 0.61229772   | 0.00762851       |
| 68528         | Smim6         | 3.0884683    | 0.00826359       |
| 67475         | Ero1lb        | 1.32316088   | 0.00826359       |
| 380683        | Sec14l3       | -1.5058055   | 0.00877472       |
| 626410        | Gm20755       | 2.73891752   | 0.00877472       |
| 68161         | A930005H10Rik | -1.5191125   | 0.0091659        |
| 223453        | Dap           | -0.8954449   | 0.0091659        |
| 227682        | Trub2         | -0.84613     | 0.00929988       |

|           |               |            |            |
|-----------|---------------|------------|------------|
| 232345    | A2m           | -3.3230476 | 0.00942022 |
| 17219     | Mcm6          | 2.92861218 | 0.01009804 |
| 545641    | Gm5860        | 3.78555195 | 0.01009804 |
| 16616     | Klk1b21       | 1.36049828 | 0.01026946 |
| 66120     | Fkbp11        | -1.1619715 | 0.01059419 |
| 74937     | 4930481B07Rik | -1.8327347 | 0.01107537 |
| 69536     | Hemk1         | -0.8787011 | 0.01107537 |
| 76681     | Trim12a       | 4.86659832 | 0.01107537 |
| 11858     | Rnd2          | -0.9145929 | 0.01118588 |
| 232408    | Klrb1f        | 4.31525678 | 0.01226153 |
| 20745     | Spock1        | -3.0413485 | 0.0130579  |
| 83485     | Ngrn          | -0.7051558 | 0.01438691 |
| 20901     | Strap         | 0.53186268 | 0.01438691 |
| 100862363 | NA            | 2.24798579 | 0.01446073 |
| 67588     | Rnf41         | 0.45340382 | 0.01456454 |
| 72203     | 2610507I01Rik | 2.49882897 | 0.01515025 |
| 72393     | Faim2         | -4.5396667 | 0.01541501 |
| 11807     | Apoa2         | 2.56720861 | 0.01617637 |
| 107993    | Bfsp2         | 3.95566423 | 0.01617637 |
| 170733    | Klra17        | -3.8729795 | 0.01714109 |
| 241624    | Exd1          | -2.0262668 | 0.01747455 |
| 75627     | Snpc1         | 1.04735229 | 0.01795079 |
| 20775     | Sqle          | -0.9377122 | 0.01805896 |
| 193280    | C030037D09Rik | 1.61035531 | 0.01860012 |
| 102278    | Cpne7         | 3.29814345 | 0.01860012 |
| 20409     | Ostf1         | -0.7776553 | 0.01860012 |
| 245884    | Fam71f2       | -2.2215442 | 0.01860012 |
| 51902     | Rnf24         | -1.878648  | 0.01918396 |
| 74319     | Mettl23       | 0.81852548 | 0.02059026 |
| 20957     | Sycp1         | -4.9359471 | 0.02059026 |
| 207175    | Cetn4         | 1.11012473 | 0.02168949 |
| 22685     | Zfp239        | -1.494765  | 0.02168949 |
| 16619     | Klk1b27       | 1.56166992 | 0.02168949 |
| 192136    | Sugct         | 3.46917395 | 0.02168949 |
| 100038712 | Gm10516       | 1.82623192 | 0.02427493 |
| 100502984 | Gm19487       | 3.18327918 | 0.02558998 |
| 214585    | Spg11         | 0.52797311 | 0.02585715 |
| 18685     | Phtf1         | 0.6275655  | 0.02600861 |
| 70419     | 2810408A11Rik | -1.4985653 | 0.02664316 |

|           |               |            |            |
|-----------|---------------|------------|------------|
| 625901    | Gm6634        | -3.166146  | 0.02963642 |
| 326619    | Hist1h4a      | -2.078545  | 0.03005022 |
| 67487     | Dhx40         | 0.54148826 | 0.03005022 |
| 71517     | 9030624J02Rik | 0.51867462 | 0.03012741 |
| 276950    | Sfn8          | 3.70264545 | 0.03115371 |
| 67937     | Tmem59l       | -3.2258619 | 0.03171237 |
| 54418     | Fmn2          | -3.5466157 | 0.03291734 |
| 17921     | Myo7a         | 0.98808298 | 0.03344662 |
| 78725     | D730001G18Rik | 2.31274576 | 0.03362933 |
| 108653    | Rimklb        | 1.46317781 | 0.03362933 |
| 238024    | Fn3krp        | 0.66860593 | 0.03879445 |
| 619304    | I830134H01Rik | 2.7760406  | 0.03879445 |
| 554292    | Methig1       | 3.36562915 | 0.03916687 |
| 18705     | Pik3c2g       | -2.2548221 | 0.04022661 |
| 623273    | Alms1-ps2     | 3.1377467  | 0.04057352 |
| 105833    | Ccdc65        | -2.1410372 | 0.04280561 |
| 11811     | Apobec2       | 2.03488907 | 0.04280561 |
| 330173    | 2610524H06Rik | -0.848222  | 0.04305815 |
| 73921     | Scpep1os      | 1.36971461 | 0.04305815 |
| 26447     | Poli          | -0.8590682 | 0.04305815 |
| 227627    | Obp2a         | -2.1882535 | 0.04305815 |
| 15199     | Hebp1         | 1.20116259 | 0.04305815 |
| 75530     | Lym7          | 1.17464601 | 0.04362807 |
| 94094     | Trim34a       | 2.16722591 | 0.04362807 |
| 234912    | 9230110C19Rik | -0.7085389 | 0.04362807 |
| 207592    | Tbc1d16       | -0.6580715 | 0.04370771 |
| 319184    | Hist1h2bk     | -2.3793364 | 0.04480577 |
| 319180    | Hist1h2bf     | 3.42581408 | 0.04550802 |
| 100041621 | Gm3435        | -1.0374131 | 0.04550802 |
| 665155    | Srp54b        | 0.6839561  | 0.04550802 |
| 230103    | Npr2          | -0.8438254 | 0.04550802 |
| 13646     | Klk1b22       | -5.0911668 | 0.04707906 |
| 327951    | Cyb5d1        | 0.82412466 | 0.04707906 |
| 83453     | Chrdl1        | -2.0905602 | 0.04797226 |
| 66184     | Rps4l         | 0.958852   | 0.04797226 |
| 100101806 | Srp54c        | 0.58844519 | 0.04797226 |
| 52120     | Hgsnat        | 0.42321761 | 0.04797226 |
| 12654     | Chil1         | -2.9782324 | 0.04815213 |
| 381062    | Ermard        | -0.7093107 | 0.04815213 |



|        |               |            |            |
|--------|---------------|------------|------------|
| 319887 | E030030I06Rik | 4.04419147 | 0.04871269 |
| 71919  | Rpap3         | 0.69017988 | 0.04871269 |
| 27421  | Abcc6         | 1.27682001 | 0.04898752 |
| 634720 | Gm11735       | -4.3017523 | 0.04969328 |

**Supplementary Table 2. Differentially expressed genes between untreated control and cisplatin treated control kidneys**

| GeneID    | Symbol   | logFC      | adj.P.Val  |
|-----------|----------|------------|------------|
| 20620     | Plk2     | 2.20891701 | 0.01022916 |
| 23886     | Gdf15    | 2.08647683 | 0.01022916 |
| 100628618 | Mir5106  | 3.41467029 | 0.01522251 |
| 12575     | Cdkn1a   | 3.47027765 | 0.0250149  |
| 16667     | Krt17    | 3.79124009 | 0.02713213 |
| 27280     | Phlda3   | 2.97218796 | 0.02713213 |
| 74041     | Ddias    | 2.98043547 | 0.02713213 |
| 100042444 | Trav6d-6 | 2.38975536 | 0.02713213 |
| 230784    | Sesn2    | 1.15774959 | 0.03034261 |

**Supplementary Table 3. Differentially expressed genes between cisplatin treated control and cisplatin treated *Fan1* KO kidneys**

| GeneID    | Symbol        | logFC      | adj.P.Val  |
|-----------|---------------|------------|------------|
| 217066    | Gm15698       | -7.2214362 | 4.82E-06   |
| 22262     | Uox           | 5.29807928 | 2.17E-05   |
| 20195     | S100a11       | 2.48237377 | 4.88E-05   |
| 16668     | Krt18         | 2.52957987 | 5.20E-05   |
| 99571     | Fgg           | 3.38445719 | 6.18E-05   |
| 100502897 | Gm12854       | 2.14029601 | 6.18E-05   |
| 18216     | Ntsr1         | 5.32895435 | 6.18E-05   |
| 15361     | Hmga1         | 3.11330917 | 0.00010096 |
| 74253     | Klrg2         | 2.94998114 | 0.00010096 |
| 434437    | Amt           | -1.3525005 | 0.00012998 |
| 66161     | Pop4          | 1.98632475 | 0.00013511 |
| 14455     | Gas5          | 1.66546475 | 0.0001604  |
| 13014     | Cstb          | 1.26959702 | 0.00018873 |
| 622070    | Gm15133       | 5.86828869 | 0.00018873 |
| 71826     | 1700001F09Rik | 4.80541042 | 0.00018873 |

|           |               |            |            |
|-----------|---------------|------------|------------|
| 11303     | Abca1         | 1.83827332 | 0.00020356 |
| 435328    | Ighv1-67      | -4.8097822 | 0.00021534 |
| 20928     | Abcc9         | -2.0877955 | 0.00027263 |
| 242594    | 1700024P16Rik | 2.07319136 | 0.00028666 |
| 232714    | Mgam          | -1.4671026 | 0.00028666 |
| 14060     | F13b          | -2.43518   | 0.00031016 |
| 14187     | Akr1b8        | 2.88358181 | 0.0003258  |
| 613254    | AA465934      | -2.4606561 | 0.0003258  |
| 12305     | Ddr1          | 0.95371959 | 0.0003258  |
| 11837     | Rplp0         | 1.50514339 | 0.0003258  |
| 100504344 | Gm20186       | 2.9566645  | 0.0003258  |
| 193217    | BC018473      | -8.0747513 | 0.0003258  |
| 106672    | Al413582      | 1.53717674 | 0.00035609 |
| 22339     | Vegfa         | -1.0423771 | 0.00035609 |
| 433855    | Al506816      | 5.05343458 | 0.00035609 |
| 399609    | C130046K22Rik | 6.07904425 | 0.00035609 |
| 11364     | Acadm         | -1.8170737 | 0.00039077 |
| 80292     | Zxdc          | 0.69017453 | 0.00039083 |
| 52120     | Hgsnat        | 0.8597817  | 0.00039083 |
| 20194     | S100a10       | 1.16544513 | 0.00039083 |
| 213539    | Bag2          | 1.18319501 | 0.00041283 |
| 100042342 | Gm10375       | 3.8721516  | 0.00042893 |
| 330173    | 2610524H06Rik | 1.22029955 | 0.00043171 |
| 78634     | Spaca7        | 6.34080806 | 0.00046587 |
| 20200     | S100a6        | 3.96819101 | 0.00047226 |
| 23886     | Gdf15         | 1.68935211 | 0.00048562 |
| 100340    | Smpdl3b       | 3.75324585 | 0.00057538 |
| 93672     | Il24          | 5.52229047 | 0.00058741 |
| 16669     | Krt19         | 3.4074159  | 0.00060684 |
| 72275     | 2200002D01Rik | 2.46327072 | 0.00060684 |
| 75552     | Paqr9         | -1.9736125 | 0.00060684 |
| 67704     | 1810037117Rik | -2.9509327 | 0.00060684 |
| 74129     | Dmgdh         | -2.0777891 | 0.00060684 |
| 76681     | Trim12a       | 7.02060077 | 0.00060684 |
| 20445     | St6galnac1    | -5.7993796 | 0.00064479 |
| 17918     | Myo5a         | -1.5410299 | 0.0006821  |
| 100043257 | Gm15453       | 2.13824417 | 0.00076447 |
| 57784     | Bin3          | 0.8057198  | 0.00078667 |
| 72205     | Eml2          | 0.98765934 | 0.00078667 |

|           |          |            |            |
|-----------|----------|------------|------------|
| 20682     | Sox9     | 2.22398609 | 0.00079959 |
| 13685     | Eif4ebp1 | 1.83467623 | 0.00079959 |
| 98256     | Kmo      | -2.1336524 | 0.00079959 |
| 67510     | Tvp23b   | -0.8206514 | 0.00079959 |
| 75272     | Erich6b  | 4.58433705 | 0.00079959 |
| 75986     | Agmat    | -1.8354609 | 0.00081913 |
| 320145    | Sp8      | 4.74428626 | 0.00081913 |
| 554292    | Methig1  | 4.75010506 | 0.00085734 |
| 77552     | Shisa4   | 1.57320459 | 0.00086401 |
| 21356     | Tapbp    | 0.7814715  | 0.00086401 |
| 68528     | Smim6    | 3.6364879  | 0.00089159 |
| 20197     | S100a3   | 3.95589577 | 0.0008943  |
| 68695     | Hddc3    | -2.2766622 | 0.00092793 |
| 629059    | Fam124a  | 2.43764578 | 0.00093238 |
| 70560     | Wars2    | -0.7676731 | 0.00093238 |
| 170770    | Bbc3     | 1.81179361 | 0.00093238 |
| 236539    | Phgdh    | 2.25433873 | 0.00093238 |
| 17219     | Mcm6     | 3.36096931 | 0.00093238 |
| 16905     | Lmna     | 0.96400867 | 0.00093238 |
| 380683    | Sec14l3  | -2.0543633 | 0.00093238 |
| 11603     | Agrn     | 1.01255724 | 0.00093238 |
| 18810     | Plec     | 0.9032714  | 0.00093238 |
| 67588     | Rnf41    | 0.58259142 | 0.00093238 |
| 12740     | Cldn4    | 1.92409931 | 0.00093238 |
| 16854     | Lgals3   | 2.08218807 | 0.00093238 |
| 13419     | Dnase1   | -3.293229  | 0.00093238 |
| 56753     | Tacstd2  | 1.71036469 | 0.00093238 |
| 12040     | Bckdhb   | -1.30974   | 0.00093238 |
| 74175     | Crct1    | 6.41975665 | 0.00093238 |
| 11839     | Areg     | 6.29077079 | 0.00093238 |
| 17189     | Mb       | 5.34900455 | 0.00093238 |
| 100628618 | Mir5106  | -3.2137287 | 0.00093238 |
| 71773     | Ugt2b1   | 2.77796975 | 0.00093238 |
| 243659    | Styk1    | 2.647309   | 0.00094121 |
| 224419    | Map3k7cl | -1.4566165 | 0.0009553  |
| 15979     | Ifngr1   | 1.26430901 | 0.0009553  |
| 347708    | Dppa1    | 4.80716993 | 0.00097464 |
| 21753     | Tes      | 1.27145012 | 0.00104829 |
| 76113     | Lpo      | 9.11305923 | 0.00104829 |

|        |            |            |            |
|--------|------------|------------|------------|
| 230779 | Serinc2    | 1.38090404 | 0.00108864 |
| 18504  | Pax2       | 0.65503755 | 0.00110959 |
| 114584 | Clic1      | 1.17434227 | 0.00113784 |
| 24056  | Sh3bp5     | -1.0287289 | 0.00113784 |
| 233168 | Al987944   | 0.76452867 | 0.00117557 |
| 18146  | Npdc1      | 0.87063791 | 0.00117557 |
| 12558  | Cdh2       | 1.99644986 | 0.0012071  |
| 227580 | C1ql3      | 1.45739284 | 0.00121534 |
| 71768  | Vwce       | -1.4541209 | 0.00121534 |
| 209584 | Tyw3       | -2.1070942 | 0.00121534 |
| 22321  | Vars       | 0.86429098 | 0.00121534 |
| 268860 | Abat       | -1.5958551 | 0.00121534 |
| 71770  | Ap2b1      | 0.53709095 | 0.00121534 |
| 29812  | Ndr3       | -0.6515345 | 0.00121534 |
| 211401 | Mtss1      | -1.252954  | 0.00121534 |
| 435784 | Rps15a-ps8 | -7.0806836 | 0.00121534 |
| 112405 | Egln1      | -0.786141  | 0.00122681 |
| 11431  | Acp1       | 1.98006747 | 0.0012661  |
| 14251  | Flot1      | 1.07694397 | 0.00131064 |
| 75578  | Fggy       | -1.1511798 | 0.00132598 |
| 209176 | Ido2       | -4.7635633 | 0.00132904 |
| 19663  | Rbpms      | 0.6646869  | 0.00132904 |
| 74150  | Slc35f5    | 0.45249666 | 0.00132904 |
| 19275  | Ptpn       | 3.09972979 | 0.00133067 |
| 19079  | Prkab1     | 0.79774    | 0.00133291 |
| 272551 | Gins2      | 2.51978441 | 0.00133437 |
| 59126  | Nek6       | 1.03411419 | 0.00133912 |
| 330695 | Ctxn1      | 1.91937817 | 0.00135322 |
| 18176  | Nras       | 0.60914914 | 0.00135322 |
| 170733 | Klra17     | -4.5083825 | 0.00135322 |
| 110257 | Hba-a2     | -8.2384597 | 0.0013544  |
| 234825 | Klhdc4     | 1.24021989 | 0.00141134 |
| 235106 | Ntm        | 4.22538612 | 0.00143164 |
| 14121  | Fbp1       | -1.589539  | 0.00145197 |
| 77031  | Slc9a8     | -2.0698211 | 0.00151013 |
| 11745  | Anxa3      | 3.31722535 | 0.00151026 |
| 70510  | Rnf167     | -0.6568797 | 0.00151452 |
| 76051  | Ganc       | -1.2205713 | 0.00151919 |
| 14693  | Gnb2       | 0.59377838 | 0.00151919 |

|           |               |            |            |
|-----------|---------------|------------|------------|
| 64213     | St7           | -0.9215301 | 0.00153558 |
| 229699    | Slc16a4       | -2.2441699 | 0.00155211 |
| 54634     | Magix         | -1.4654621 | 0.00158267 |
| 241624    | Exd1          | -2.5284807 | 0.00158482 |
| 671878    | Gm14680       | -1.1983301 | 0.00158482 |
| 18038     | Nfkbil1       | 0.79439427 | 0.0016035  |
| 12018     | Bak1          | 1.13169271 | 0.00161681 |
| 17975     | Ncl           | 0.64786693 | 0.00162052 |
| 217666    | L2hgdh        | -1.9126102 | 0.00162052 |
| 21346     | Tagln2        | 0.7677467  | 0.00162052 |
| 52024     | Ankrd22       | 2.20972181 | 0.00163258 |
| 319819    | 4932435O22Rik | 2.20972181 | 0.00163258 |
| 72203     | 2610507I01Rik | 2.78592892 | 0.00167174 |
| 66526     | Tceanc2       | 0.60495142 | 0.00167174 |
| 11639     | Ak4           | -2.2329685 | 0.00167174 |
| 100037258 | Dnajc3        | -0.8296224 | 0.00167174 |
| 68133     | Gcsh          | -1.1319594 | 0.00167174 |
| 212647    | Aldh4a1       | -1.2669013 | 0.00167812 |
| 67369     | Qpctl         | 0.76705377 | 0.00171629 |
| 15936     | Ier2          | 0.81019101 | 0.00171629 |
| 13682     | Eif4a2        | -0.6375944 | 0.00171629 |
| 19249     | Ptpn13        | 1.00831707 | 0.00171629 |
| 63993     | Slc5a7        | 4.75180418 | 0.00171629 |
| 16691     | Krt8          | 1.55883891 | 0.00172954 |
| 243084    | Tmprss11e     | 2.87134367 | 0.00172954 |
| 21873     | Tjp2          | 0.49775225 | 0.00178363 |
| 26949     | Vat1          | 1.27049765 | 0.00178795 |
| 14619     | Gjb2          | -1.5416792 | 0.00178795 |
| 319625    | Galm          | -1.1413535 | 0.00178795 |
| 110648    | Lmx1a         | 3.12708362 | 0.00178795 |
| 17133     | Maff          | 1.93362141 | 0.00178951 |
| 71777     | Ing3          | -0.6370237 | 0.00178951 |
| 13595     | Ebp           | -0.8209342 | 0.00178951 |
| 12365     | Casp14        | 5.72475984 | 0.00178951 |
| 74937     | 4930481B07Rik | -1.8886309 | 0.00180359 |
| 13639     | Efna4         | 1.60908204 | 0.00180359 |
| 68949     | 1500012F01Rik | 1.3451618  | 0.00180359 |
| 19244     | Ptp4a2        | 0.56073266 | 0.00180359 |
| 11651     | Akt1          | 0.47453409 | 0.00180359 |

|           |               |            |            |
|-----------|---------------|------------|------------|
| 110253    | Triobp        | 0.79596128 | 0.00180359 |
| 76261     | 0610040J01Rik | 0.79293582 | 0.00180359 |
| 22754     | Zfp92         | 4.608811   | 0.00180359 |
| 71982     | Snx10         | 1.92567089 | 0.00180574 |
| 16819     | Lcn2          | 4.30119936 | 0.00180574 |
| 66184     | Rps4l         | 1.25533235 | 0.00180574 |
| 12763     | Cmah          | -1.4905967 | 0.00180574 |
| 67903     | Gipc1         | 0.87350152 | 0.00180574 |
| 329384    | Pthr1         | 2.10966064 | 0.00183633 |
| 71684     | Rbm43         | 0.89054969 | 0.00183633 |
| 15507     | Hspb1         | 2.12889605 | 0.00183633 |
| 216825    | Usp22         | 0.50768624 | 0.00184154 |
| 26436     | Psg16         | 5.05555459 | 0.00184154 |
| 286940    | Flnb          | 0.4327633  | 0.00184181 |
| 100038359 | Gm10685       | 7.16203731 | 0.00185287 |
| 242773    | Slc45a1       | 4.31734391 | 0.00185287 |
| 105193    | Nhlrc1        | -1.1850765 | 0.00185318 |
| 19826     | Rnps1         | 0.92821543 | 0.00185318 |
| 13479     | Dpep1         | -1.8464863 | 0.00185318 |
| 64291     | Osbpl1a       | -0.7765551 | 0.00185318 |
| 13490     | Drd3          | 2.65167494 | 0.00186488 |
| 626410    | Gm20755       | 2.65167494 | 0.00186488 |
| 16878     | Lif           | 1.89128027 | 0.00187689 |
| 15427     | Hoxc9         | 1.26457434 | 0.00187689 |
| 17216     | Mcm2          | 1.00694355 | 0.00187689 |
| 67041     | Oxct1         | -1.6348949 | 0.00187689 |
| 11854     | Rhod          | 0.73019367 | 0.00187689 |
| 19719     | Rfng          | -1.1263738 | 0.00187689 |
| 18704     | Pik3c2a       | 0.76080869 | 0.00187689 |
| 234407    | Colgalt1      | 0.61114216 | 0.00187689 |
| 13392     | Dlx2          | 2.95228677 | 0.00187689 |
| 99709     | Clca4b        | 2.95228677 | 0.00187689 |
| 22286     | Utf1          | 2.49316775 | 0.00187689 |
| 56473     | Fads2         | -1.0713266 | 0.00192769 |
| 282619    | Sbsn          | 3.52856865 | 0.00198623 |
| 381633    | Gm1673        | 2.47053057 | 0.00198623 |
| 64685     | Nmi           | 0.98262867 | 0.00199939 |
| 14734     | Gpc3          | 1.72792046 | 0.00199939 |
| 66795     | Atg10         | -0.7191765 | 0.0020597  |

|           |               |            |            |
|-----------|---------------|------------|------------|
| 111241    | Hmga1-rs1     | 1.58500821 | 0.0020673  |
| 213760    | Prepl         | -0.9900025 | 0.0020673  |
| 22223     | Uchl1         | 2.8224298  | 0.00207292 |
| 270058    | Map1s         | 0.81729094 | 0.00207292 |
| 107869    | Cth           | -1.1975986 | 0.00207292 |
| 78038     | Mccc2         | -1.3222306 | 0.00207292 |
| 100042444 | Trav6d-6      | -2.1888137 | 0.00207292 |
| 68794     | Finc          | 4.36814164 | 0.00212107 |
| 20603     | Sms           | -1.1899655 | 0.0021412  |
| 68697     | 1110036E04Rik | 3.4821942  | 0.0021412  |
| 56489     | lkbke         | 1.11991429 | 0.0021441  |
| 230904    | Fbxo2         | 2.44219502 | 0.00217027 |
| 791405    | Gm10002       | 2.86829063 | 0.00223844 |
| 69211     | 2310081J21Rik | -3.9713414 | 0.0022497  |
| 19652     | Rbm3          | 0.92499589 | 0.0022539  |
| 20739     | Spta1         | -6.2094577 | 0.0022539  |
| 12224     | Klf5          | 2.56097919 | 0.00226484 |
| 218138    | Gmds          | 0.68884565 | 0.00228559 |
| 18590     | Pdgfa         | 1.06898088 | 0.00232262 |
| 140577    | Ankrd6        | 1.09630827 | 0.00232458 |
| 80877     | Lrba          | -0.5643045 | 0.00237571 |
| 73458     | Aldh3b3       | -2.9966582 | 0.00239706 |
| 75342     | 4930556J24Rik | -2.196756  | 0.00239706 |
| 16188     | Il3ra         | 1.26986165 | 0.00239706 |
| 66945     | Sdha          | -0.9601197 | 0.00239706 |
| 195208    | Dcdc2a        | 1.67556506 | 0.00239706 |
| 18034     | Nfkb2         | 1.26267455 | 0.00239706 |
| 19201     | Pstpip2       | -1.1800251 | 0.00241609 |
| 330222    | Sdk1          | 1.55746205 | 0.00245906 |
| 99010     | Lpcat4        | 1.27080018 | 0.00245906 |
| 66353     | Riid1         | 2.14023579 | 0.00245906 |
| 100502979 | Gm17546       | -1.3579663 | 0.0024663  |
| 100047183 | NA            | 2.10737855 | 0.0024663  |
| 69581     | Rhou          | 1.61416318 | 0.0024663  |
| 12638     | Cftr          | 1.39522194 | 0.0024663  |
| 212933    | Pm20d1        | -1.8564755 | 0.0024663  |
| 72469     | Plcd3         | 1.25331907 | 0.00249714 |
| 102693    | Phldb1        | 0.98773641 | 0.00249714 |
| 66761     | 4933417A18Rik | -2.6098874 | 0.00256371 |

|           |               |            |            |
|-----------|---------------|------------|------------|
| 319482    | 9530053A07Rik | 3.88639004 | 0.00256371 |
| 386463    | Cdsn          | 4.14482289 | 0.00256371 |
| 211323    | Nrg1          | 1.62904308 | 0.00256371 |
| 243085    | Ugt2b35       | 6.57833994 | 0.00256371 |
| 13033     | Ctsd          | 1.32579562 | 0.00256371 |
| 13645     | Egf           | -2.2772487 | 0.00256371 |
| 11534     | Adk           | -1.0003221 | 0.00256371 |
| 12828     | Col4a3        | -1.5047077 | 0.00256371 |
| 67003     | Uqcrc2        | -0.9190487 | 0.00259966 |
| 235973    | A630095E13Rik | 3.81495323 | 0.00260707 |
| 15894     | Icam1         | 1.60019931 | 0.00263265 |
| 216019    | Hkdc1         | 1.47450339 | 0.0026599  |
| 213233    | Tapbpl        | 0.71672705 | 0.0026599  |
| 12557     | Cdh17         | 5.74504411 | 0.00267799 |
| 67023     | Use1          | 0.73800875 | 0.00271875 |
| 329002    | Zfp236        | 0.58296788 | 0.00273189 |
| 104183    | Chil4         | 5.59406467 | 0.00285389 |
| 226970    | Arhgef4       | 1.38656903 | 0.00285415 |
| 15223     | Foxj1         | 2.09910077 | 0.00285549 |
| 27367     | Rpl3          | 2.43360087 | 0.00285549 |
| 272428    | Acsn5         | -1.7921877 | 0.00285549 |
| 54353     | Skap2         | 0.41500566 | 0.00292043 |
| 100862033 | NA            | 3.9624603  | 0.00292289 |
| 227627    | Obp2a         | 2.67258481 | 0.00292289 |
| 215387    | Ncaph         | 1.83304171 | 0.00292831 |
| 72273     | Smim24        | -0.8642647 | 0.00292831 |
| 12994     | Csn3          | 3.18859959 | 0.00293442 |
| 94060     | Lce3c         | 3.18859959 | 0.00293442 |
| 12069     | Bex2          | 1.83417823 | 0.00295427 |
| 101809    | Spred3        | 2.62295554 | 0.00295427 |
| 170718    | Idh3b         | -0.8272614 | 0.00295427 |
| 12488     | Cd2ap         | 0.76052175 | 0.00295427 |
| 230103    | Npr2          | -1.0450048 | 0.00295427 |
| 20747     | Spop          | -0.6334    | 0.00301552 |
| 16852     | Lgals1        | 1.96072434 | 0.00301634 |
| 241520    | Fam171b       | 2.82789906 | 0.00303621 |
| 19701     | Ren1          | -3.9133595 | 0.00303621 |
| 11946     | Atp5a1        | -0.7424393 | 0.00303917 |
| 102103    | Mtus1         | -0.8881473 | 0.00303917 |



|           |               |            |            |
|-----------|---------------|------------|------------|
| 100041286 | Gm11974       | 1.14533678 | 0.00306595 |
| 68161     | A930005H10Rik | -1.2648701 | 0.00307581 |
| 15473     | Hrsp12        | -1.2031434 | 0.00307581 |
| 106795    | Tcf19         | 1.27613257 | 0.00307827 |
| 66809     | Krt20         | 4.90629521 | 0.00307827 |
| 107971    | Frs3          | -1.1979601 | 0.00307827 |
| 52118     | Pvr           | 0.82740985 | 0.00307827 |
| 78004     | Prr15         | 1.53391957 | 0.00307827 |
| 18824     | Plp2          | 1.34830742 | 0.00307827 |
| 18674     | Slc25a3       | -0.6816691 | 0.00307827 |
| 13180     | Pcbd1         | -0.9604936 | 0.00307827 |
| 232078    | Thns12        | -1.1939341 | 0.00307827 |
| 67856     | Echdc3        | -0.8623112 | 0.00307827 |
| 50762     | Fbxo6         | 0.87687261 | 0.00307827 |
| 14252     | Flot2         | 0.59576135 | 0.00307827 |
| 100039748 | Gm10020       | 0.58837816 | 0.00307827 |
| 11520     | Plin2         | 2.15287022 | 0.00308446 |
| 78286     | Nav2          | -1.3595705 | 0.00308446 |
| 68876     | Xrcc6bp1      | -0.7389522 | 0.00309321 |
| 73723     | Sh3bgrl3      | 1.62550246 | 0.00311766 |
| 22697     | Zscan21       | 0.68975217 | 0.00313148 |
| 74012     | Rap2b         | 1.41048139 | 0.00315629 |
| 67269     | Agtppb1       | -0.5978133 | 0.00319507 |
| 14765     | Gpr50         | 2.9826059  | 0.00319507 |
| 97130     | C77080        | 0.66756975 | 0.00319507 |
| 19092     | Prkg2         | 1.73875821 | 0.00320561 |
| 100861754 | NA            | -3.1776554 | 0.00330482 |
| 67487     | Dhx40         | 0.599966   | 0.00330482 |
| 69408     | Dnajc17       | 1.10582476 | 0.00331086 |
| 21384     | Tbx15         | 4.5624619  | 0.00331086 |
| 12334     | Capn2         | 0.66441267 | 0.00331086 |
| 94094     | Trim34a       | 2.46127321 | 0.00331133 |
| 209966    | Pgbd5         | 3.52272994 | 0.00331133 |
| 14421     | B4galnt1      | 2.72270079 | 0.00331133 |
| 13052     | Cxadr         | 0.74259229 | 0.00333017 |
| 192192    | Shkbp1        | 0.66498641 | 0.00334282 |
| 22388     | Wdr1          | 0.50938193 | 0.00334282 |
| 13121     | Cyp51         | -1.3855084 | 0.00338036 |
| 13427     | Dync1i2       | 0.54356792 | 0.00338292 |

|        |               |            |            |
|--------|---------------|------------|------------|
| 381831 | Igkv4-58      | -4.5118499 | 0.00345428 |
| 56747  | Sez6l         | -3.0538685 | 0.00345428 |
| 77055  | Krt76         | 3.17385512 | 0.00351458 |
| 15233  | Hgd           | -1.2831452 | 0.00355905 |
| 15422  | Hoxc13        | 1.96634048 | 0.0035717  |
| 216797 | Prss38        | 1.96634048 | 0.0035717  |
| 18705  | Pik3c2g       | -3.140959  | 0.00357575 |
| 15493  | Hsd3b2        | -4.9335107 | 0.00358233 |
| 246694 | Hps5          | -0.9268921 | 0.00358233 |
| 214901 | Chtf18        | 1.70856514 | 0.00359842 |
| 192897 | Itgb4         | 1.81070955 | 0.00359842 |
| 69123  | Eci3          | -2.2363354 | 0.00359842 |
| 12161  | Bmp6          | 0.78532643 | 0.00359842 |
| 241589 | D430041D05Rik | 4.30030497 | 0.00361434 |
| 12739  | Cldn3         | 1.89507644 | 0.00361479 |
| 394430 | Ugt1a10       | -1.0925225 | 0.00364043 |
| 80721  | Slc19a3       | -1.2246881 | 0.00364271 |
| 67392  | 4833420G17Rik | 1.29548815 | 0.00369126 |
| 93734  | Mpv17l        | -1.407871  | 0.00369126 |
| 15122  | Hba-a1        | -8.3155419 | 0.00369323 |
| 373864 | Col27a1       | -1.3736275 | 0.00369323 |
| 66950  | Tmem206       | -0.9019854 | 0.00377045 |
| 77596  | Adgrf1        | 2.91758862 | 0.00377307 |
| 74122  | Tmem43        | 1.17977627 | 0.00379297 |
| 207592 | Tbc1d16       | -0.7557249 | 0.00379297 |
| 20761  | Sprr2g        | 5.28117291 | 0.00379853 |
| 227736 | 1700019L03Rik | 1.65763671 | 0.00379981 |
| 231287 | Atp10d        | -1.3760474 | 0.00379981 |
| 26462  | Txnrd2        | -0.521603  | 0.00379981 |
| 224824 | Pex6          | -0.6510413 | 0.00379981 |
| 12808  | Cobl          | 0.58152519 | 0.00379981 |
| 99151  | Cercam        | 2.3814526  | 0.00385476 |
| 102920 | Cenpi         | 2.4450412  | 0.00393153 |
| 229927 | Clca3b        | 4.75622716 | 0.00393153 |
| 56016  | Hebp2         | 1.6787444  | 0.0039319  |
| 231050 | Galnt11       | -1.5967952 | 0.0039319  |
| 232431 | Gprc5a        | 2.93569562 | 0.00393997 |
| 227682 | Trub2         | -0.6871773 | 0.00394891 |
| 20208  | Saa1          | 6.25487997 | 0.00396223 |

|           |               |            |            |
|-----------|---------------|------------|------------|
| 109652    | Acy1          | -2.2154104 | 0.00396223 |
| 227197    | Ndufs1        | -1.0775094 | 0.00399843 |
| 386454    | Rnf39         | 1.85153232 | 0.00402624 |
| 22409     | Wnt10a        | 2.76740303 | 0.00402624 |
| 15129     | Hbb-b1        | -8.220306  | 0.00402624 |
| 237175    | Adgrg2        | 1.73106019 | 0.00402624 |
| 57376     | Smarce1       | 0.68404174 | 0.00402624 |
| 266645    | Acmsd         | -2.5628175 | 0.00402624 |
| 17850     | Mut           | -1.3232776 | 0.00402624 |
| 14381     | G6pdx         | 0.56352947 | 0.00402624 |
| 100861774 | NA            | 0.61321794 | 0.00402624 |
| 109254    | Adtrp         | -1.1287663 | 0.00402624 |
| 434460    | Rps15a-ps2    | 2.58631075 | 0.00402776 |
| 22276     | Uros          | -1.1535899 | 0.00402776 |
| 74478     | Snx29         | -1.7135576 | 0.00402776 |
| 14107     | Fat1          | 0.91026449 | 0.00402776 |
| 83485     | Ngrn          | -0.6346743 | 0.00402776 |
| 15980     | lfngr2        | 0.79289949 | 0.00404437 |
| 70503     | Ddo           | -1.2725319 | 0.00411408 |
| 353287    | Clec18a       | 2.92819602 | 0.00417339 |
| 67680     | Sdhb          | -0.8165589 | 0.00417955 |
| 16011     | Igfbp5        | -2.0288832 | 0.00417955 |
| 50773     | Nt5c          | 0.72521076 | 0.00417955 |
| 12476     | Cd151         | 0.7034704  | 0.00418022 |
| 23831     | Car14         | -1.965041  | 0.00419167 |
| 14261     | Fmo1          | -1.3421983 | 0.00419167 |
| 71517     | 9030624J02Rik | 0.54586732 | 0.00419167 |
| 621603    | Aldh3b2       | -1.9333348 | 0.0042569  |
| 213819    | Casd1         | -0.5844417 | 0.0042569  |
| 57312     | Mrps31        | -0.800824  | 0.00427479 |
| 667552    | Gm8700        | -4.6104433 | 0.00428776 |
| 195046    | Nlrp1a        | 5.09151442 | 0.00430298 |
| 329910    | Acot11        | -1.6255645 | 0.00430298 |
| 29813     | Zfp385a       | 0.85511201 | 0.00430298 |
| 171095    | Il17rc        | 0.60829705 | 0.00430298 |
| 67834     | Idh3a         | -0.5846297 | 0.00430298 |
| 54126     | Arhgef7       | -0.5026561 | 0.00430298 |
| 12874     | Cpd           | 0.48447448 | 0.00430388 |
| 231086    | Hadhb         | -0.8540475 | 0.00430388 |

|           |               |            |            |
|-----------|---------------|------------|------------|
| 54419     | Cldn6         | 1.9857093  | 0.00434694 |
| 231655    | Oasl1         | 1.75069058 | 0.00441301 |
| 17218     | Mcm5          | 1.28902636 | 0.00441301 |
| 94346     | Tmem40        | 3.21139356 | 0.00441301 |
| 100502960 | Gm19474       | 2.79950554 | 0.00441301 |
| 11992     | Auh           | -0.7253302 | 0.00441301 |
| 245650    | Gucy2f        | -3.0798408 | 0.00442693 |
| 14725     | Lrp2          | -1.7472958 | 0.00443341 |
| 13171     | Dbt           | -1.1748214 | 0.00447656 |
| 18140     | Uhrf1         | 1.72079855 | 0.00454472 |
| 26447     | Poli          | -0.951853  | 0.00454472 |
| 102294    | Cyp4v3        | 0.93633692 | 0.00454472 |
| 74366     | 4932422M17Rik | -0.584699  | 0.00454472 |
| 13992     | Khdrbs3       | -0.9432265 | 0.00454472 |
| 70300     | Fuz           | -0.6912828 | 0.00454472 |
| 66912     | Bzw2          | 0.82018896 | 0.00455411 |
| 72350     | Zc2hc1c       | -0.9654431 | 0.00456297 |
| 433931    | Pigg          | -0.9440017 | 0.00457734 |
| 68201     | Ccdc34        | 0.93558767 | 0.00457734 |
| 54124     | Cks1b         | 1.30176555 | 0.00460366 |
| 100040617 | Gm12603       | 4.66189016 | 0.00460366 |
| 212168    | Zswim4        | 0.67120784 | 0.00460366 |
| 226564    | Fmo4          | -1.1982786 | 0.00460366 |
| 70791     | Hars2         | -0.6065095 | 0.00460366 |
| 225288    | Fhod3         | 0.91480963 | 0.00460366 |
| 26909     | Exo1          | 2.52787546 | 0.00461533 |
| 140709    | Col26a1       | 1.64410651 | 0.00461533 |
| 100201    | Tmem64        | -1.5787514 | 0.0046633  |
| 104923    | Adi1          | -0.8879451 | 0.0046633  |
| 435965    | Lrp3          | -0.8925544 | 0.00466489 |
| 68728     | Trp53inp2     | -0.6855606 | 0.00469228 |
| 270685    | Mthfd1l       | 0.95107054 | 0.00469249 |
| 226356    | Cfap221       | 3.30665835 | 0.00475445 |
| 72297     | B3gnt3        | 3.75866    | 0.00480999 |
| 20352     | Sema4b        | 0.75862245 | 0.0048243  |
| 14368     | Fzd6          | 0.97197867 | 0.00482817 |
| 56739     | Rec8          | 2.54465529 | 0.00483667 |
| 230233    | lkbkap        | 0.64497765 | 0.00483667 |
| 546546    | Serpina3h     | 6.28165261 | 0.00484668 |

|           |               |            |            |
|-----------|---------------|------------|------------|
| 19698     | Relb          | 1.43478105 | 0.00484668 |
| 208922    | Cpeb3         | -1.3159614 | 0.00484668 |
| 110821    | Pcca          | -1.2043638 | 0.00484668 |
| 71919     | Rpap3         | 0.79206365 | 0.00486266 |
| 21952     | Tnni1         | 2.95620185 | 0.00487302 |
| 14194     | Fh1           | -0.825458  | 0.00488231 |
| 93873     | Pcdhb2        | -3.1766423 | 0.00492042 |
| 226527    | BC026585      | -1.5761537 | 0.00495932 |
| 20760     | Sprr2f        | 6.63900276 | 0.00496953 |
| 78784     | Celf3         | 2.45313194 | 0.00498118 |
| 74528     | Mgme1         | -1.019348  | 0.00499414 |
| 319887    | E030030I06Rik | 4.2003464  | 0.00507668 |
| 216835    | Usp43         | 0.97308235 | 0.00507668 |
| 11910     | Atf3          | 1.69463279 | 0.00507668 |
| 69221     | 2410006H16Rik | 1.25583514 | 0.00507668 |
| 13870     | Ercc1         | 1.02606816 | 0.00507668 |
| 78388     | Mvp           | 1.33451884 | 0.00513045 |
| 107765    | Ankrd1        | 3.18454618 | 0.00514242 |
| 225579    | Slc27a6       | 5.60644386 | 0.00514242 |
| 15893     | Ica1          | 0.95727669 | 0.00514242 |
| 69815     | Krtcap3       | 0.78896362 | 0.00514242 |
| 53322     | Nucb2         | 1.70464859 | 0.00514242 |
| 72181     | Nsun4         | -0.4990521 | 0.00514242 |
| 57436     | Gabarapl1     | -0.6574978 | 0.00514242 |
| 26970     | Pla2g2e       | 4.98782512 | 0.00514976 |
| 12124     | Bik           | 3.16400799 | 0.00515298 |
| 19293     | Pvalb         | -5.1214344 | 0.00515298 |
| 67105     | Timm21        | -0.8170587 | 0.00515298 |
| 14431     | Gamt          | -0.9003795 | 0.00515298 |
| 58875     | Hibadh        | -1.3881379 | 0.00515298 |
| 74440     | Cmip          | -1.0636301 | 0.00515298 |
| 72320     | Kif1bp        | -0.5530283 | 0.00515298 |
| 28295     | D10Jhu81e     | -0.8170033 | 0.00515298 |
| 16157     | Il11ra1       | -0.6138302 | 0.00515298 |
| 638580    | Gm7244        | -2.8753701 | 0.00516652 |
| 16591     | Kl            | -1.6606224 | 0.00516652 |
| 20848     | Stat3         | 0.99993564 | 0.00516792 |
| 100044509 | Tgfbr3l       | 1.52615628 | 0.00518169 |
| 67738     | Ppid          | -0.5436909 | 0.00518204 |

|           |               |            |            |
|-----------|---------------|------------|------------|
| 30948     | Bin1          | 0.74069328 | 0.00518919 |
| 14913     | Guca1a        | 3.34859785 | 0.00519884 |
| 17289     | Mertk         | -0.7691565 | 0.00519884 |
| 20957     | Sycp1         | -4.5014027 | 0.00521622 |
| 57230     | Sap30bp       | 0.50958509 | 0.0052167  |
| 110385    | Pde4c         | -1.2704666 | 0.0052167  |
| 20135     | Rrm2          | 1.30984712 | 0.00525125 |
| 66314     | Tpd52l2       | 0.4631604  | 0.00525125 |
| 110749    | Chaf1b        | 2.17155765 | 0.00527141 |
| 75209     | Sv2c          | -2.3913426 | 0.00527141 |
| 71834     | Zbtb43        | -0.4404691 | 0.00527141 |
| 117147    | Acsm1         | -1.7182562 | 0.00527141 |
| 83946     | Phip          | 0.65399513 | 0.00529182 |
| 26412     | Map4k2        | -0.6594394 | 0.00530068 |
| 69634     | Clybl         | -0.8501146 | 0.00530068 |
| 193280    | C030037D09Rik | 1.45524792 | 0.00534188 |
| 109361    | D730005E14Rik | 5.63791619 | 0.00534188 |
| 100503810 | Gm13056       | 2.7635657  | 0.00534188 |
| 13614     | Edn1          | 2.25047023 | 0.00534188 |
| 100124387 | Traj16        | 3.10922155 | 0.00534188 |
| 76263     | Gstk1         | -0.8730932 | 0.00534188 |
| 20753     | Sprr1a        | 3.85608007 | 0.00543635 |
| 68539     | Tmem109       | -0.4793624 | 0.00543635 |
| 69513     | 1700030C10Rik | 4.86090954 | 0.0054672  |
| 17449     | Mdh1          | -0.9685952 | 0.0054672  |
| 20851     | Stat5b        | -0.7574817 | 0.0054672  |
| 17925     | Myo9b         | 0.56669678 | 0.0054717  |
| 54486     | Hpgds         | 3.37268297 | 0.00548223 |
| 83673     | Snhg1         | 0.75907997 | 0.00548223 |
| 320982    | Arl4c         | 1.7262116  | 0.00548223 |
| 66120     | Fkbp11        | -0.9077893 | 0.00551413 |
| 11488     | Adam11        | 1.7850527  | 0.00551413 |
| 17306     | Sypl2         | -1.6174965 | 0.0055242  |
| 71701     | Pnpt1         | -0.717509  | 0.00556102 |
| 67900     | Mtfp1         | -1.0524661 | 0.005608   |
| 16956     | Lpl           | -2.4780766 | 0.00565082 |
| 228770    | Rspo4         | 1.96347632 | 0.00565993 |
| 15364     | Hmga2         | 3.57141561 | 0.00566156 |
| 100503884 | Ccdc149       | 0.91767482 | 0.00566547 |

|           |               |            |            |
|-----------|---------------|------------|------------|
| 207704    | Gtpbp10       | -0.5605344 | 0.00566547 |
| 71897     | Lypd6b        | 1.43767716 | 0.00567577 |
| 627984    | Nlrp1c-ps     | 4.14092289 | 0.00567577 |
| 74556     | Themis3       | 2.25106709 | 0.00570256 |
| 16782     | Lamc2         | 1.68018867 | 0.00571097 |
| 13807     | Eno2          | 1.52665393 | 0.00574621 |
| 100042130 | Gm10376       | 2.51074225 | 0.00574621 |
| 100504068 | Hotairm1      | 0.65389368 | 0.00574621 |
| 17921     | Myo7a         | 0.9950351  | 0.00574621 |
| 232983    | Cxcl17        | 3.62708708 | 0.0057845  |
| 74558     | Gvin1         | 2.00587238 | 0.0057845  |
| 11443     | Chrnbl        | 1.96984284 | 0.0057845  |
| 58801     | Pmaip1        | 2.00479398 | 0.0057845  |
| 320806    | Gfm2          | -0.9263106 | 0.0057845  |
| 634720    | Gm11735       | -4.5754838 | 0.00579681 |
| 13002     | Dnajc5        | 0.50741508 | 0.00581149 |
| 100066    | Cyp2j11       | -1.5972226 | 0.00581929 |
| 74597     | 4833418N02Rik | -1.406511  | 0.00583091 |
| 75538     | Fam71e1       | 1.14691074 | 0.00583091 |
| 16780     | Lamb3         | 2.71411658 | 0.00583091 |
| 232314    | Ppp4r2        | 0.36744063 | 0.00583091 |
| 641361    | Pinlyp        | 3.34460116 | 0.00587824 |
| 245857    | Ssh3          | 0.50724341 | 0.00589102 |
| 70337     | lyd           | -0.9703253 | 0.00591201 |
| 76281     | Tax1bp3       | 1.03506717 | 0.00595982 |
| 16776     | Lama5         | 0.75303767 | 0.00597374 |
| 100502624 | Gm13483       | 4.93967541 | 0.00599403 |
| 66885     | Acadsb        | -0.6910685 | 0.00599403 |
| 100503392 | 4833438C02Rik | 0.88428356 | 0.00604609 |
| 108958    | Fam73b        | -0.4765662 | 0.00607471 |
| 20706     | Serpib9b      | 4.74607384 | 0.00607566 |
| 100502888 | Gm19434       | 3.83628928 | 0.00608002 |
| 16790     | Anpep         | -1.3739108 | 0.00608002 |
| 19697     | Rela          | 0.58713121 | 0.00608002 |
| 18973     | Pole          | 1.83728041 | 0.00615956 |
| 67099     | Mettl21a      | 0.84648393 | 0.0061671  |
| 330485    | Tmem145       | 2.73674084 | 0.00622865 |
| 228775    | Trib3         | 2.37342913 | 0.00623747 |
| 29870     | Gtse1         | 1.77463756 | 0.00623747 |

|           |           |            |            |
|-----------|-----------|------------|------------|
| 223631    | BC025446  | -1.3226766 | 0.00623747 |
| 20356     | Sema5a    | 1.13603836 | 0.00623747 |
| 73710     | Tubb2b    | 1.95460535 | 0.00624216 |
| 13542     | Dvl1      | -0.6269325 | 0.00624216 |
| 108114    | Slc22a7   | -1.5967063 | 0.00624216 |
| 213948    | Atg9b     | 3.13033967 | 0.00630464 |
| 385493    | AU015836  | 4.43554162 | 0.00630464 |
| 11796     | Birc3     | 1.33534747 | 0.00630464 |
| 14063     | F2rl1     | 1.70369151 | 0.00630464 |
| 68021     | Bphl      | -1.2470923 | 0.00630464 |
| 18148     | Npm1      | 0.47510801 | 0.00630464 |
| 100039239 | Gm2115    | -2.1366688 | 0.00631853 |
| 71268     | Lrrfip2   | 0.46098783 | 0.00634525 |
| 67037     | Pmf1      | 0.67457158 | 0.00636899 |
| 319468    | Ppm1h     | -0.5529712 | 0.00640413 |
| 100504526 | Gm20269   | 6.66673249 | 0.00644151 |
| 72080     | Sapcd2    | 2.32508443 | 0.00644151 |
| 16520     | Kcnj4     | 4.56184188 | 0.00644151 |
| 70572     | Ipo5      | 0.42652956 | 0.00644151 |
| 15201     | Hells     | 1.44963569 | 0.00645118 |
| 51902     | Rnf24     | -1.9251528 | 0.00646862 |
| 277496    | Lkaaeear1 | 1.96250505 | 0.00650093 |
| 16548     | Khk       | -1.2475718 | 0.00650093 |
| 108960    | Irak2     | -0.7412637 | 0.0065105  |
| 80287     | Apobec3   | 2.27226823 | 0.00653214 |
| 100008567 | Gm14964   | 1.72960538 | 0.00656066 |
| 11514     | Adcy8     | 2.77796975 | 0.00656066 |
| 93747     | Echs1     | -0.9731137 | 0.00656066 |
| 27279     | Tnfrsf12a | 2.04378487 | 0.00656066 |
| 12269     | C4bp      | 3.31105622 | 0.0065684  |
| 20091     | Rps3a1    | 1.75111788 | 0.0065684  |
| 19360     | Rad50     | 0.53377968 | 0.0065684  |
| 23849     | Klf6      | 1.81186048 | 0.0065684  |
| 68188     | Sympk     | 0.49663996 | 0.0065684  |
| 230163    | Aldob     | -0.8273088 | 0.00656881 |
| 93695     | Gpnmb     | 3.68609414 | 0.00664157 |
| 211253    | Mtrf1     | -0.6832919 | 0.00665822 |
| 17873     | Gadd45b   | 1.97545817 | 0.00665822 |
| 12560     | Cdh3      | 1.68045142 | 0.00665822 |



|           |               |            |            |
|-----------|---------------|------------|------------|
| 207819    | 4930539E08Rik | 1.44011022 | 0.00666485 |
| 233033    | Samd4b        | 0.54737089 | 0.00666485 |
| 18604     | Pdk2          | -0.9840526 | 0.00669786 |
| 100504586 | Gm20300       | -0.6945557 | 0.0067109  |
| 320595    | Phf8          | -0.4106945 | 0.00684622 |
| 239096    | Cdh24         | 1.30597111 | 0.00686423 |
| 100042114 | Gm3676        | 2.8095338  | 0.00686423 |
| 266632    | Irak4         | 0.76546079 | 0.00686423 |
| 104718    | Ttc7b         | -1.4296707 | 0.00686423 |
| 17826     | Fam89b        | 0.52643408 | 0.00686423 |
| 107392    | Brms1         | 0.68378057 | 0.00686423 |
| 229211    | Acad9         | -1.1745869 | 0.00686423 |
| 15353     | Hmg20b        | 0.44394438 | 0.00686423 |
| 15469     | Prmt1         | 0.81395422 | 0.00686423 |
| 66108     | Ndufa9        | -0.5871147 | 0.00686569 |
| 69387     | Dnajb13       | 1.56220032 | 0.00687705 |
| 14917     | Gucy2c        | 3.11546772 | 0.00687705 |
| 21335     | Tacc3         | 1.06593092 | 0.00689674 |
| 211389    | Suox          | -1.1938971 | 0.00691436 |
| 59287     | Ncstn         | 0.38190405 | 0.00692061 |
| 13646     | Klk1b22       | -5.0748575 | 0.00692778 |
| 72267     | Lrrc8e        | 1.80499314 | 0.00694202 |
| 18089     | Nkx2-3        | 3.78711363 | 0.00694202 |
| 20924     | Supt5         | 0.34266402 | 0.00694202 |
| 66313     | Smurf2        | -0.6078838 | 0.00694202 |
| 68585     | Rtn4          | 1.0848318  | 0.00694827 |
| 16007     | Cyr61         | 1.67780726 | 0.00694827 |
| 70478     | Mipep         | -0.8493787 | 0.00694827 |
| 54200     | Sult2b1       | 2.40587277 | 0.00696677 |
| 320394    | Cenpt         | 0.80049778 | 0.00696677 |
| 22629     | Ywhah         | 0.58076495 | 0.00696677 |
| 100526503 | NA            | 1.72000014 | 0.00701742 |
| 269224    | Pask          | 1.11321433 | 0.00704582 |
| 77866     | E130102H24Rik | -0.6876742 | 0.00704582 |
| 243897    | Ggn           | 1.58640599 | 0.00705738 |
| 55925     | Syt8          | 4.52503777 | 0.00708677 |
| 67963     | Npc2          | 0.43834495 | 0.0070889  |
| 67629     | Spc24         | 1.10203758 | 0.00712382 |
| 19879     | Slc22a8       | -2.0617844 | 0.00712382 |

|           |               |            |            |
|-----------|---------------|------------|------------|
| 12822     | Col18a1       | 1.28204796 | 0.0071396  |
| 16418     | Eif6          | 1.02571181 | 0.00718111 |
| 320311    | Rnf152        | -1.1090398 | 0.00718111 |
| 12231     | Btn1a1        | 3.66120427 | 0.00723274 |
| 626316    | Gm13051       | 3.34951605 | 0.00724481 |
| 13177     | Eci1          | -0.8682479 | 0.00725056 |
| 70549     | Tln2          | -1.2310517 | 0.00725807 |
| 14161     | Fga           | 2.06212328 | 0.00727028 |
| 21376     | Tbrg1         | 0.52723038 | 0.00732294 |
| 12567     | Cdk4          | 0.47028635 | 0.0073531  |
| 26921     | Map4k4        | 0.87440793 | 0.00737058 |
| 108156    | Mthfd1        | -0.6269592 | 0.00737069 |
| 12977     | Csf1          | 2.39230754 | 0.0073716  |
| 57278     | Bcam          | 2.04732288 | 0.00738873 |
| 17121     | Mxd3          | 1.23157505 | 0.00741874 |
| 12189     | Brca1         | 1.73818938 | 0.00741874 |
| 20210     | Saa3          | 6.33231396 | 0.00741874 |
| 67304     | 3110070M22Rik | 2.05636438 | 0.00741874 |
| 330409    | Cecr2         | -1.2420458 | 0.00741874 |
| 12359     | Cat           | -1.2068363 | 0.00741874 |
| 231507    | Plac8         | 1.09328126 | 0.00741874 |
| 18795     | Plcb1         | -0.9359925 | 0.00741874 |
| 26415     | Mapk13        | 1.00896928 | 0.00741874 |
| 20656     | Sod2          | -0.9667359 | 0.00741874 |
| 20402     | Zfp106        | -0.5506702 | 0.00741874 |
| 74901     | Kbtbd11       | -1.0162599 | 0.00741874 |
| 226517    | Smg7          | -0.5502559 | 0.00741874 |
| 70701     | Nipal1        | 2.22547945 | 0.00743022 |
| 72701     | Zfp618        | 0.8061101  | 0.00743022 |
| 228019    | Mettl8        | -0.9323942 | 0.00743022 |
| 227683    | Coq4          | -1.0011786 | 0.00743022 |
| 18458     | Pabpc1        | 0.56981607 | 0.00743022 |
| 102278    | Cpne7         | 2.39762811 | 0.00743625 |
| 18300     | Oit1          | 5.36286352 | 0.00744851 |
| 381820    | Smim10l1      | -0.6227976 | 0.00744851 |
| 100862381 | Gm21691       | -2.4864617 | 0.00751112 |
| 72832     | Crtac1        | 3.68989901 | 0.00751112 |
| 434232    | lqck          | 1.51867196 | 0.00753269 |
| 545481    | Arhgap40      | 4.57280917 | 0.00753269 |

|           |               |            |            |
|-----------|---------------|------------|------------|
| 18478     | Pah           | -1.7259654 | 0.00753269 |
| 20259     | Scin          | 2.45486434 | 0.00753269 |
| 15374     | Hn1           | 1.05398514 | 0.00753269 |
| 103149    | Upb1          | -1.2949888 | 0.00753269 |
| 69652     | 2310069B03Rik | 3.5744928  | 0.00753755 |
| 242584    | Wdr78         | -0.7619665 | 0.00753755 |
| 20524     | Slc25a17      | -0.5471392 | 0.00753755 |
| 105841    | Dennd3        | -0.5934518 | 0.00755283 |
| 18793     | Plaur         | 2.87901548 | 0.00756223 |
| 18000     | 2-Sep         | 0.41116597 | 0.00756223 |
| 18971     | Pold1         | 1.12972735 | 0.00757071 |
| 17427     | Mns1          | 2.53547666 | 0.00762366 |
| 271127    | Adamts16      | 1.76456813 | 0.00762366 |
| 381598    | 2610005L07Rik | -0.8589107 | 0.00762366 |
| 13836     | Epha2         | 1.86575443 | 0.00762366 |
| 12307     | Calb1         | -1.7126802 | 0.00762366 |
| 666028    | Gm7897        | 2.24800173 | 0.00765403 |
| 73469     | Rnf38         | 0.50107719 | 0.00769314 |
| 73910     | Arhgap18      | -0.906974  | 0.00769314 |
| 230726    | Rhbdl2        | 3.21603758 | 0.0076954  |
| 100972    | Rab28         | -0.4037667 | 0.0076954  |
| 320560    | Dennd5b       | -0.667114  | 0.00771965 |
| 257630    | Il17f         | -3.7926567 | 0.00772995 |
| 320469    | 9930014A18Rik | 1.20918762 | 0.00772995 |
| 225870    | Rin1          | 1.91252851 | 0.00772995 |
| 260302    | Gga3          | -0.467998  | 0.00772995 |
| 20916     | Sucla2        | -1.0482567 | 0.00773073 |
| 22044     | Trh           | 2.96679809 | 0.00773557 |
| 56708     | Cicf1         | 2.65441284 | 0.00773557 |
| 379043    | Raet1e        | 5.41438284 | 0.00775383 |
| 619304    | I830134H01Rik | 2.5916352  | 0.00775383 |
| 17967     | Ncam1         | 1.91559547 | 0.00775383 |
| 16881     | Lig1          | 1.47184862 | 0.00775383 |
| 229731    | Slc25a24      | 2.20279211 | 0.00776054 |
| 101489    | Ric8          | 0.59421018 | 0.007778   |
| 243339    | Tmem130       | 2.21772684 | 0.00779129 |
| 100504343 | Gm20185       | 2.60947613 | 0.00779129 |
| 333654    | Ppp1r13l      | 0.88153492 | 0.00779129 |
| 71911     | Bdh1          | -1.4493742 | 0.00779129 |

|           |               |            |            |
|-----------|---------------|------------|------------|
| 20411     | Sorbs1        | -0.6341136 | 0.00779129 |
| 69318     | 1700007K09Rik | 2.87478972 | 0.0078389  |
| 97998     | Deptor        | 1.64041438 | 0.00787071 |
| 107045    | Lars          | 0.43847002 | 0.00787071 |
| 100503915 | Smpd5         | 1.6442546  | 0.00787299 |
| 12333     | Capn1         | 0.60000597 | 0.00787299 |
| 77577     | Spns3         | 1.43253616 | 0.0079062  |
| 56031     | Ppie          | 0.4525056  | 0.0079062  |
| 109136    | Mmaa          | -0.6800267 | 0.00790804 |
| 20311     | Cxcl5         | 5.06424377 | 0.00791995 |
| 380975    | Higd1c        | 4.58913105 | 0.00791995 |
| 70829     | Ccdc93        | -0.7065245 | 0.00791995 |
| 20377     | Sfrp1         | -1.35936   | 0.00793074 |
| 66617     | Ntmt1         | 0.58645447 | 0.00794914 |
| 100039719 | Gm2386        | -3.3862177 | 0.00798982 |
| 53374     | Chst3         | -1.716848  | 0.00804051 |
| 68352     | Aspdh         | -2.935101  | 0.00805517 |
| 100038668 | Gm12526       | -2.4735527 | 0.00808002 |
| 102093    | Phkb          | -0.8090738 | 0.00808002 |
| 72090     | Entpd8        | -0.9948679 | 0.00808881 |
| 434223    | Gm1966        | 4.84882516 | 0.0080989  |
| 545645    | Gm13283       | 3.26357118 | 0.0080989  |
| 11501     | Adam8         | 2.22837036 | 0.0080989  |
| 100503659 | Cbarp         | 0.70638538 | 0.00810558 |
| 16880     | Lifr          | -0.595387  | 0.00810558 |
| 211255    | Kbtbd7        | -0.6496642 | 0.00812544 |
| 30060     | Mfi2          | 4.65341309 | 0.00817268 |
| 68763     | 1110038B12Rik | 1.00995526 | 0.00817268 |
| 22240     | Dpysl3        | 1.90843767 | 0.00817351 |
| 69440     | Dennd6b       | 0.52030391 | 0.00818217 |
| 67602     | Necap1        | -0.5945146 | 0.00821941 |
| 54720     | Rcan1         | 1.00077566 | 0.00821941 |
| 68014     | Zwilch        | 1.35405369 | 0.00822649 |
| 71452     | Ankrd40       | -0.4748726 | 0.00823284 |
| 14972     | H2-K1         | 1.11739053 | 0.00824589 |
| 56372     | 1110004F10Rik | 0.38944228 | 0.00826079 |
| 59020     | Pdzk1         | -1.034475  | 0.00827189 |
| 28015     | Polr2m        | -0.3457622 | 0.00827189 |
| 245622    | Fam199x       | 0.68337136 | 0.00827765 |

|           |                |            |            |
|-----------|----------------|------------|------------|
| 105689    | Mycbp2         | 0.39672889 | 0.00829273 |
| 12759     | Clu            | 2.00416084 | 0.00830053 |
| 12050     | Bcl2l2         | -0.4302109 | 0.00830792 |
| 14621     | Gjb4           | 3.60912509 | 0.0083624  |
| 19335     | Rab23          | -0.8696881 | 0.00840435 |
| 100042856 | Gm4070         | 1.49636157 | 0.00850997 |
| 18114     | Rrp1           | 0.58612231 | 0.00850997 |
| 100101807 | 1700047117Rik2 | 1.20897256 | 0.00852676 |
| 83397     | Akap12         | 3.31571828 | 0.00852952 |
| 210029    | Metrn1         | -0.6915253 | 0.00853253 |
| 76294     | Asb5           | 3.26902209 | 0.00857883 |
| 78925     | Srd5a1         | 1.96932419 | 0.00857883 |
| 11607     | Agtr1a         | -0.9594775 | 0.00860223 |
| 77022     | 2700099C18Rik  | 1.44035317 | 0.00861315 |
| 217845    | Ifi2712b       | 4.8543084  | 0.00861315 |
| 76574     | Mfsd2a         | -2.2541692 | 0.00861315 |
| 72113     | Adck1          | -0.5419905 | 0.00863434 |
| 99982     | Kdm1a          | 0.43214453 | 0.00863434 |
| 22038     | Plscr1         | 0.60826788 | 0.00863434 |
| 20677     | Sox4           | 1.7021806  | 0.00867159 |
| 72434     | Lypd3          | 3.17331782 | 0.0086803  |
| 57911     | Gsdma          | 4.3862091  | 0.00869126 |
| 74499     | Sost           | -4.5215213 | 0.00872453 |
| 75104     | Mmd2           | -1.4321033 | 0.00872453 |
| 234267    | Gpm6a          | -1.2032446 | 0.00872453 |
| 245527    | Eda2r          | 1.71821635 | 0.00873133 |
| 212514    | Spice1         | -0.5862402 | 0.00873133 |
| 319513    | Pced1a         | -0.696265  | 0.00873133 |
| 20719     | Serpib6a       | 1.54322299 | 0.00873724 |
| 56722     | Litaf          | 1.62769019 | 0.00873724 |
| 70397     | Tmem70         | -0.9591546 | 0.00873724 |
| 16400     | Itga3          | 1.27169958 | 0.00874918 |
| 332942    | Gm853          | -2.4701683 | 0.00875582 |
| 64540     | Tspan4         | 0.75290713 | 0.00875582 |
| 50880     | Scly           | -0.7280007 | 0.00875582 |
| 20289     | Scx            | 1.77833185 | 0.00880984 |
| 227289    | Gpbar1         | 2.566102   | 0.00888208 |
| 52665     | Echdc1         | -0.7762694 | 0.00888208 |
| 18605     | Enpp1          | -0.725681  | 0.00888208 |

|           |               |            |            |
|-----------|---------------|------------|------------|
| 100504323 | Gm20172       | 3.11459552 | 0.0089473  |
| 18218     | Dusp8         | 1.04341679 | 0.00902074 |
| 234911    | Mmp27         | 2.26629835 | 0.00903576 |
| 66659     | Acp6          | -1.1843821 | 0.00911893 |
| 21752     | Tert          | 1.33221408 | 0.00913274 |
| 52829     | Lurap1l       | -0.8458397 | 0.00913274 |
| 170938    | Zfp617        | 0.5237542  | 0.00915377 |
| 216760    | Mfap3         | 0.77694516 | 0.00915377 |
| 68628     | Fbxw9         | 0.8476951  | 0.00915377 |
| 56316     | Ggcx          | -0.9010171 | 0.00915422 |
| 69824     | Glod5         | -0.7397845 | 0.00918502 |
| 15561     | Htr3a         | 5.02213241 | 0.00918946 |
| 104776    | Aldh6a1       | -1.3785476 | 0.00921398 |
| 12579     | Cdkn2b        | 2.57848102 | 0.00922836 |
| 229589    | Prune         | 0.67934015 | 0.00922836 |
| 56248     | Ak3           | -0.8802368 | 0.00928405 |
| 217219    | Fam171a2      | 1.43645434 | 0.00928499 |
| 382686    | 3110053B16Rik | 4.60856868 | 0.00929862 |
| 67043     | Syap1         | -0.5141064 | 0.00929862 |
| 545641    | Gm5860        | 2.6545522  | 0.00935972 |
| 100504297 | Gm20157       | 2.50702391 | 0.00936276 |
| 272396    | Tarsl2        | -0.6763308 | 0.00938492 |
| 22658     | Pcgf2         | 0.51176341 | 0.00943021 |
| 98417     | Cnih4         | 0.31965934 | 0.00943021 |
| 14156     | Fen1          | 0.79558259 | 0.00949082 |
| 68044     | Chac2         | -1.343197  | 0.00949082 |
| 18115     | Nnt           | -1.281762  | 0.00949082 |
| 23945     | Mgll          | -1.4062164 | 0.00949082 |
| 68263     | Pdhb          | -0.6589698 | 0.00949082 |
| 544817    | Arhgap27      | 0.55584455 | 0.00949082 |
| 20480     | Clpb          | -0.7239382 | 0.00949082 |
| 20532     | Slc3a1        | -0.9776508 | 0.00955755 |
| 14281     | Fos           | 1.87822707 | 0.00961894 |
| 212517    | Cfap44        | 4.24070509 | 0.00972493 |
| 56046     | Uqcc1         | -0.6056082 | 0.00972493 |
| 15366     | Hmmr          | 2.22182322 | 0.00974647 |
| 72309     | Tmem158       | 1.87974086 | 0.00974647 |
| 71242     | Spata24       | 1.0323034  | 0.00974647 |
| 69692     | Hddc2         | 1.02148936 | 0.00974647 |

|           |               |            |            |
|-----------|---------------|------------|------------|
| 382639    | Zbtb42        | 0.9697315  | 0.00976939 |
| 68077     | Gltscr2       | 0.6180708  | 0.00979101 |
| 219148    | Fam167a       | 1.79093828 | 0.00980005 |
| 78725     | D730001G18Rik | 1.82893724 | 0.00983398 |
| 232408    | Klrb1f        | 3.07427495 | 0.00984371 |
| 74041     | Ddias         | 1.13746289 | 0.00984371 |
| 319953    | Tll1          | 0.47113129 | 0.00986381 |
| 68743     | Anln          | 2.12696356 | 0.00987254 |
| 21367     | Cntn2         | 1.93397589 | 0.00990176 |
| 171282    | Acot4         | -0.9096875 | 0.00990176 |
| 21897     | Tlr1          | 2.60179735 | 0.00994076 |
| 269198    | Nbeal1        | 0.8263856  | 0.00994076 |
| 20273     | Scn8a         | 1.74955484 | 0.00996436 |
| 69724     | Rnaseh2a      | 0.54945859 | 0.00996436 |
| 78287     | Rbsn          | -0.7115447 | 0.00997241 |
| 26456     | Sema4g        | -1.1473888 | 0.00997241 |
| 70350     | Basp1         | 2.90039842 | 0.00997546 |
| 667823    | Trim5         | 3.67481614 | 0.01002105 |
| 231986    | Jazf1         | 1.72549629 | 0.01002105 |
| 432763    | Prr7          | 1.98694739 | 0.01003462 |
| 100503605 | Hbb-bs        | -8.4524863 | 0.01003462 |
| 240672    | Dusp5         | 1.98842436 | 0.01003462 |
| 228608    | Smox          | 1.20244536 | 0.01003462 |
| 100042880 | Rpl17-ps10    | 0.46695518 | 0.01003462 |
| 73385     | Fam177a       | 1.20292024 | 0.0100488  |
| 66102     | Cxcl16        | 1.03510264 | 0.01005257 |
| 11944     | Atp4a         | 2.87028612 | 0.01006156 |
| 66052     | Sdhc          | -0.6823989 | 0.01006156 |
| 78070     | Cpt1c         | 2.68520563 | 0.01010925 |
| 12631     | Cfl1          | 0.59563419 | 0.0101396  |
| 216527    | Ccm2          | 0.5476702  | 0.0101396  |
| 70405     | Calml3        | 2.47581111 | 0.01021401 |
| 667693    | Gm8765        | -3.835036  | 0.01023821 |
| 71601     | Ceacam20      | 4.39360319 | 0.01026836 |
| 140494    | Atp6v0a4      | -0.5729175 | 0.01030695 |
| 56742     | Psrc1         | 2.14203168 | 0.01037082 |
| 70101     | Cyp4f16       | 1.16795015 | 0.01041713 |
| 11747     | Anxa5         | 1.3102628  | 0.01041713 |
| 72503     | 2610507B11Rik | -0.7987195 | 0.01042776 |

|        |           |            |            |
|--------|-----------|------------|------------|
| 109801 | Glo1      | -1.0435196 | 0.0104868  |
| 80888  | Hspb8     | 1.2679189  | 0.01050745 |
| 67399  | Pdlim7    | 1.22817422 | 0.01051143 |
| 233328 | Lrrk1     | 0.61694211 | 0.01051143 |
| 20937  | Suv39h1   | 0.6223709  | 0.01051482 |
| 14964  | H2-D1     | 0.97442078 | 0.01051482 |
| 67121  | Mastl     | 0.91713097 | 0.0105877  |
| 232943 | Klc3      | 1.39091123 | 0.01061977 |
| 78266  | Zfp687    | 0.45175767 | 0.01061977 |
| 20348  | Sema3c    | 1.89301267 | 0.01061977 |
| 216350 | Tspan8    | 1.76544168 | 0.01061977 |
| 52521  | Zfp622    | 0.46534911 | 0.0106203  |
| 50784  | Ppap2c    | 0.68268086 | 0.01066564 |
| 68789  | Trmt61b   | -1.1717326 | 0.01068625 |
| 382118 | Zkscan7   | -0.843401  | 0.01068625 |
| 114643 | Oas1c     | 1.06094444 | 0.01068625 |
| 20624  | Eftud2    | 0.39821099 | 0.01068625 |
| 66771  | Gid4      | -0.7685988 | 0.01068628 |
| 67878  | Tmem33    | -0.6867664 | 0.01068628 |
| 100434 | Slc44a1   | 0.68957956 | 0.01070005 |
| 214585 | Spg11     | 0.44452719 | 0.01070005 |
| 67689  | Aldh3b1   | 0.65034656 | 0.01070005 |
| 15209  | Hesx1     | 2.67469555 | 0.01070447 |
| 244882 | Tnfaip8l3 | 2.97592109 | 0.0107612  |
| 12266  | C3        | 2.75021568 | 0.0107612  |
| 75627  | Snpc1     | 0.78329624 | 0.01076893 |
| 67217  | L3hypdh   | -1.2739529 | 0.01080717 |
| 68680  | Fitm1     | -1.2720274 | 0.01080717 |
| 13528  | Dtnb      | 0.407463   | 0.01080717 |
| 23802  | Amfr      | -0.4761355 | 0.01080717 |
| 338348 | Ttc16     | 1.42269108 | 0.01086903 |
| 223267 | Ggact     | -0.8522332 | 0.01086903 |
| 67873  | Mri1      | 1.07204472 | 0.01089476 |
| 19294  | Pvrl2     | 0.70470443 | 0.0109131  |
| 434218 | Trim34b   | -1.8971141 | 0.01093219 |
| 75812  | Tasp1     | -0.4385426 | 0.01093219 |
| 13448  | Dok1      | 1.51160951 | 0.01103834 |
| 14766  | Adgrg1    | 0.64731588 | 0.01104206 |
| 11841  | Arf2      | 0.60727227 | 0.01104206 |



|           |               |            |            |
|-----------|---------------|------------|------------|
| 110310    | Krt7          | 1.01427368 | 0.0110426  |
| 12904     | Crabp2        | 3.04228279 | 0.01113626 |
| 69826     | Ms4a10        | 3.86219889 | 0.01113626 |
| 108017    | Fxyd4         | 1.40535073 | 0.01113626 |
| 13382     | Dld           | -0.8070818 | 0.01113626 |
| 74340     | Ahcyl2        | -1.3931814 | 0.01113626 |
| 29859     | Sult4a1       | 2.72224194 | 0.01114219 |
| 19221     | Ptgfrn        | 1.06197767 | 0.01118004 |
| 75404     | Arhgap36      | 3.98954666 | 0.01120165 |
| 319765    | Igf2bp2       | 0.87399021 | 0.01120165 |
| 246738    | Dnajc28       | -1.1626503 | 0.01120165 |
| 27280     | Phlda3        | 1.43239144 | 0.01120165 |
| 74776     | Ppa2          | -0.7891755 | 0.01126555 |
| 71733     | Susd2         | -1.9617718 | 0.01127913 |
| 16438     | Itpr1         | -0.5984802 | 0.01131281 |
| 100040377 | NA            | 1.271172   | 0.01134687 |
| 76338     | Rab2b         | -0.5812835 | 0.01134687 |
| 620140    | Ighv1-83      | -3.5184211 | 0.01134872 |
| 100038730 | Gm10387       | -1.6650159 | 0.01134872 |
| 50883     | Chek2         | 1.04037925 | 0.01134872 |
| 319269    | A130040M12Rik | 3.68070594 | 0.01134872 |
| 12297     | Cacnb3        | 1.32645381 | 0.01134872 |
| 101521    | AI314278      | -1.7790161 | 0.01134872 |
| 11571     | Crisp1        | 3.78042705 | 0.01135079 |
| 234724    | Tat           | 3.88782976 | 0.01135079 |
| 78830     | Slc25a12      | -0.4199755 | 0.01135079 |
| 71995     | Erv3          | 2.37265896 | 0.01136958 |
| 67622     | Mxra7         | 1.63259594 | 0.01136958 |
| 170731    | Mfn2          | -0.5361989 | 0.01136958 |
| 30941     | Usp21         | -0.482444  | 0.01146664 |
| 68618     | 1110012L19Rik | 0.67134486 | 0.01146798 |
| 13198     | Ddit3         | 0.99311071 | 0.01146798 |
| 231872    | Aimp2         | 0.51498323 | 0.01146798 |
| 12830     | Col4a5        | 0.60499605 | 0.01146798 |
| 67307     | Pbld2         | -0.7645287 | 0.01146798 |
| 70209     | Tmem143       | -0.6832605 | 0.0114854  |
| 75746     | Morc4         | -0.7322174 | 0.01149398 |
| 12669     | Chrm1         | 1.9945458  | 0.01151515 |
| 108653    | Rimklb        | 1.26026827 | 0.01159558 |

|           |               |            |            |
|-----------|---------------|------------|------------|
| 11669     | Aldh2         | -0.741113  | 0.01159558 |
| 22793     | Zyx           | 0.61990683 | 0.01159945 |
| 58249     | Fibp          | 0.49144339 | 0.01165748 |
| 110135    | Fgb           | 4.77832489 | 0.01166742 |
| 626359    | Wdr93         | -1.4795394 | 0.01171266 |
| 110033    | Kif22         | 1.30955415 | 0.01171266 |
| 67285     | Cwc27         | 0.50146026 | 0.01171266 |
| 270076    | Gcdh          | -1.2781536 | 0.01171266 |
| 170835    | Inpp5j        | -0.8133897 | 0.01171266 |
| 98053     | Gtf2f1        | 0.67387014 | 0.01171266 |
| 627110    | Tubb2a-ps2    | 1.87799272 | 0.01171985 |
| 212965    | BC024386      | -2.4109278 | 0.01177627 |
| 72479     | Hsdl2         | -0.4888884 | 0.01179379 |
| 13653     | Egr1          | 1.85838557 | 0.01188865 |
| 69876     | Thap3         | 0.51567348 | 0.01188881 |
| 621156    | Apoo-ps       | -0.7794637 | 0.01188881 |
| 244556    | Zfp791        | -1.4526012 | 0.01189978 |
| 634731    | Susd1         | 1.55285342 | 0.01189978 |
| 16477     | Junb          | 1.66541198 | 0.01190454 |
| 213417    | Klhdc8a       | 1.15556139 | 0.01194476 |
| 22630     | Ywhaq         | 0.4536787  | 0.01194476 |
| 16560     | Kif1a         | 1.83824866 | 0.01196636 |
| 14711     | Gnmt          | -1.2372141 | 0.01198866 |
| 18044     | Nfya          | -0.8345797 | 0.01198866 |
| 100861635 | Gm21093       | 2.86484916 | 0.01202182 |
| 20776     | Tmie          | -0.9908319 | 0.01205254 |
| 114644    | Slc13a3       | -1.4577127 | 0.01205254 |
| 14678     | Gnai2         | 0.49186293 | 0.01205254 |
| 68205     | Urm1          | 0.57344412 | 0.01205254 |
| 22154     | Tubb5         | 1.09176271 | 0.01213766 |
| 15982     | lfrd1         | 0.72939272 | 0.01215514 |
| 53379     | Hnrnpa2b1     | -0.3409831 | 0.01219996 |
| 73095     | Slc25a42      | -1.4616649 | 0.01231921 |
| 11989     | Slc7a3        | 1.83727536 | 0.01232139 |
| 13194     | Ddb1          | 0.35846424 | 0.01233599 |
| 70984     | 4931406C07Rik | -1.5209102 | 0.01236271 |
| 319929    | A630076J17Rik | -1.6717061 | 0.01239508 |
| 67938     | Myl12b        | 0.40009345 | 0.01248419 |
| 214627    | Papd5         | -0.6540424 | 0.01248419 |

|           |             |            |            |
|-----------|-------------|------------|------------|
| 74365     | Lonrf3      | -0.8011531 | 0.01250611 |
| 100042055 | Gm10377     | 1.88129457 | 0.01260678 |
| 15114     | Hap1        | 1.74243679 | 0.01260793 |
| 71781     | Slc16a14    | -1.8416797 | 0.01260793 |
| 14694     | Gnb2l1      | 0.49567301 | 0.01260793 |
| 14555     | Gpd1        | -0.990978  | 0.01261269 |
| 668724    | Gm9320      | 0.58972683 | 0.01261269 |
| 433700    | Spag8       | -1.9784279 | 0.01262434 |
| 66694     | Uqcrfs1     | -0.9676226 | 0.01263529 |
| 26944     | Tinag       | -0.6985952 | 0.01263631 |
| 71891     | Cdadcl1     | -0.4766171 | 0.01266522 |
| 13039     | Ctsl        | 0.7034126  | 0.01267375 |
| 381983    | Lmtk3       | 1.9388982  | 0.01270017 |
| 68801     | Elovl5      | -0.7118651 | 0.01271259 |
| 14825     | Cxcl1       | 3.0633833  | 0.01272265 |
| 14186     | Fgfr4       | -0.9806901 | 0.01272265 |
| 231070    | Insig1      | -0.8582042 | 0.01288074 |
| 105428    | Fam149b     | -0.6406987 | 0.01289997 |
| 230917    | Tmem201     | -0.44316   | 0.01292283 |
| 20620     | Plk2        | 0.80186909 | 0.01293115 |
| 100502825 | Rpl37rt     | 0.52712731 | 0.01298773 |
| 12879     | Cys1        | 0.59163328 | 0.01298773 |
| 387160    | Mir142      | 2.71075048 | 0.0130114  |
| 77045     | Bcl7a       | -0.7992584 | 0.01307589 |
| 668577    | Ighv1-73    | -2.6306839 | 0.0131019  |
| 69749     | Epb4.1l4aos | 1.12594968 | 0.0131019  |
| 66704     | Rbm4b       | -0.386066  | 0.0131019  |
| 74551     | Pck2        | 0.82743414 | 0.0131019  |
| 76265     | Tsen54      | -0.5669347 | 0.01320814 |
| 142681    | Slc34a3     | -2.1332325 | 0.013277   |
| 100502635 | Gm11525     | 2.55985574 | 0.01331404 |
| 226025    | Trpm3       | 1.98280487 | 0.01333996 |
| 213464    | Rbbp5       | -0.3935508 | 0.01333996 |
| 239611    | Muc19       | 4.77207042 | 0.01334653 |
| 103710    | Slc35e4     | 0.76120406 | 0.01336477 |
| 17872     | Ppp1r15a    | 0.7461657  | 0.01338962 |
| 50758     | Fbxl17      | -0.4105122 | 0.01338962 |
| 22245     | Uck1        | -0.6600508 | 0.01338962 |
| 11811     | Apobec2     | 2.01386247 | 0.01344405 |

|           |               |            |            |
|-----------|---------------|------------|------------|
| 99326     | Garnl3        | 1.63520612 | 0.01344405 |
| 330962    | Slc51b        | -0.5252118 | 0.01344405 |
| 107477    | Guca1b        | 6.33893756 | 0.01349216 |
| 228413    | Prrg4         | 1.95888931 | 0.01349216 |
| 207565    | Camkk2        | -0.3308743 | 0.01349845 |
| 72661     | Serp2         | 1.34273566 | 0.01349993 |
| 381534    | Ube2u         | -0.7451965 | 0.01351098 |
| 72500     | Ier5l         | 0.90765993 | 0.01351098 |
| 65969     | Cubn          | -1.2101525 | 0.01351098 |
| 54392     | Ncapg         | 2.07116974 | 0.01355348 |
| 72054     | Cyp4f18       | 3.61170896 | 0.01364345 |
| 100038605 | E030047D23Rik | 2.01291554 | 0.01364345 |
| 68888     | Gkn3          | -3.6147569 | 0.01364345 |
| 331374    | Dgkk          | 3.36487514 | 0.01364345 |
| 56532     | Ripk3         | 1.99012776 | 0.01364345 |
| 57914     | Crlf2         | 1.00778809 | 0.01364345 |
| 328186    | Gm10336       | -1.0800988 | 0.01364345 |
| 75316     | Taf1d         | 0.60654126 | 0.01364345 |
| 29815     | Bcar3         | -0.7359061 | 0.01364345 |
| 17025     | Alad          | -1.0486491 | 0.01364345 |
| 58246     | Slc35b4       | -0.6267752 | 0.01364345 |
| 67776     | Vwa5a         | 0.69744917 | 0.01364345 |
| 68917     | Hint2         | -0.8594922 | 0.01364345 |
| 100041121 | Gm10144       | -2.1201338 | 0.01366764 |
| 79201     | Tnfrsf23      | 2.73131373 | 0.01370986 |
| 104346    | Gas8          | 0.65548518 | 0.01373113 |
| 66824     | Pycard        | 1.18801671 | 0.01377093 |
| 170750    | Xpnpep1       | -0.8367431 | 0.01377093 |
| 12696     | Cirbp         | 0.83035226 | 0.01377093 |
| 66365     | Ccdc90b       | -0.4075745 | 0.01377527 |
| 13803     | Enc1          | 0.78079242 | 0.01383948 |
| 11867     | Arpc1b        | 1.3548087  | 0.01384405 |
| 666009    | Gm7889        | -2.1175574 | 0.01390347 |
| 67446     | Dusp28        | -0.5461485 | 0.01391493 |
| 213603    | Slc44a3       | 1.0345724  | 0.01391493 |
| 20878     | Aurka         | 1.26364937 | 0.01397327 |
| 70358     | Steap1        | 2.7798393  | 0.01407493 |
| 226419    | Dyrk3         | 0.8669181  | 0.01408584 |
| 331535    | Serpina7      | 3.02564122 | 0.01409629 |

|           |               |            |            |
|-----------|---------------|------------|------------|
| 100503021 | Gm19510       | 3.55250707 | 0.01409629 |
| 664994    | Isoc2a        | -1.2225673 | 0.01410501 |
| 18125     | Nos1          | -3.6303692 | 0.01413239 |
| 15901     | Id1           | 1.43330851 | 0.01413239 |
| 52064     | Coq5          | -0.614223  | 0.01413239 |
| 54391     | Rfk           | -0.4986504 | 0.01413239 |
| 15077     | Hist2h3c1     | -1.4101798 | 0.0141606  |
| 67442     | Retsat        | -0.9233273 | 0.0141606  |
| 210463    | Slc22a22      | -3.5553107 | 0.01421804 |
| 78920     | Dlst          | -0.7964897 | 0.01423203 |
| 109161    | Ube2q2        | -0.5277447 | 0.0142331  |
| 75472     | Cfap126       | 2.16576059 | 0.01424561 |
| 14377     | G6pc          | -1.9012846 | 0.01424561 |
| 20520     | Slc22a5       | -0.9224026 | 0.01424561 |
| 11504     | Adamts1       | 1.15043075 | 0.01424561 |
| 26420     | Mapk9         | -0.3886174 | 0.01424561 |
| 73132     | Slc25a16      | -0.8570991 | 0.01424561 |
| 170822    | Usp33         | -0.3832202 | 0.01424561 |
| 207785    | Csrnp2        | 0.62420201 | 0.0142986  |
| 21813     | Tgfbr2        | 0.76614971 | 0.0142986  |
| 235048    | Zfp599        | 1.83123174 | 0.01429994 |
| 27060     | Tcirg1        | 0.42669351 | 0.01429994 |
| 107993    | Bfsp2         | 2.77284303 | 0.01432929 |
| 12890     | Cplx2         | 0.76419865 | 0.01434232 |
| 78308     | Gpr108        | 0.39886051 | 0.01434359 |
| 11947     | Atp5b         | -0.7579544 | 0.01437983 |
| 16563     | Kif2a         | 0.38874577 | 0.01437983 |
| 18021     | Nfatc3        | -0.3177221 | 0.01437983 |
| 100042069 | Gm15210       | 0.36137219 | 0.01439482 |
| 103175    | D630029K05Rik | -2.8509573 | 0.01442971 |
| 209387    | Trim30d       | 3.29508168 | 0.01447199 |
| 231991    | Creb5         | 2.02450291 | 0.01447199 |
| 211331    | Ighv1-54      | -4.8927678 | 0.01447199 |
| 75530     | Lym7          | 1.03622705 | 0.01447199 |
| 170483    | Grin3b        | -1.114301  | 0.01447199 |
| 78816     | Gmip          | 0.52868188 | 0.01447199 |
| 19240     | Tmsb10        | 1.87247693 | 0.01447199 |
| 18612     | Etv4          | 1.54112899 | 0.01450092 |
| 399570    | Kank4os       | -2.6241618 | 0.01450232 |

|           |               |            |            |
|-----------|---------------|------------|------------|
| 18108     | Nmt2          | 0.64336096 | 0.01450725 |
| 268949    | Dpcr1         | 3.61204404 | 0.01455452 |
| 72258     | Kcnk10        | 3.19759894 | 0.01461137 |
| 21942     | Tnfrsf9       | 3.17367664 | 0.01461137 |
| 110084    | Dnah1         | 2.64947189 | 0.01461677 |
| 628900    | Serpina3i     | 4.83752009 | 0.01470334 |
| 80708     | Pacsin3       | 0.85542187 | 0.01470334 |
| 100504175 | Gm20100       | -2.091679  | 0.01472247 |
| 64918     | Bhmt2         | -1.8299576 | 0.01472247 |
| 216860    | Neur4         | -0.8230989 | 0.01475146 |
| 57816     | Tesc          | 1.17159886 | 0.01475881 |
| 231668    | Vsig10        | 0.49660073 | 0.01478618 |
| 110809    | Srsf1         | -0.2758715 | 0.01484532 |
| 73689     | Bloc1s2       | 0.71039255 | 0.01487309 |
| 192159    | Prpf8         | -0.3453808 | 0.01487309 |
| 102632    | Acad11        | -0.9406508 | 0.01487309 |
| 18510     | Pax8          | 0.54037217 | 0.01488876 |
| 100038561 | B230104I21Rik | 1.84166899 | 0.01489611 |
| 209692    | Dhtkd1        | -1.9096819 | 0.01493063 |
| 100862031 | NA            | -0.7987821 | 0.01509488 |
| 71934     | Car13         | 1.08816493 | 0.01513141 |
| 80859     | Nfkbiz        | 1.52494334 | 0.01522379 |
| 269614    | Pank4         | -0.3940494 | 0.01522379 |
| 66222     | Serpib1a      | 0.74543451 | 0.01522522 |
| 19041     | Ppl           | 2.55431283 | 0.01522522 |
| 75788     | Smurf1        | 0.51422651 | 0.0152595  |
| 15202     | Gml2          | -2.1838749 | 0.01529895 |
| 211535    | Ccdc114       | 1.57280312 | 0.01529895 |
| 24066     | Spry4         | -1.3434371 | 0.01529895 |
| 213550    | Dis3l         | -0.5142231 | 0.01529895 |
| 242585    | Slc35d1       | -0.47168   | 0.01530659 |
| 319213    | 4930579C12Rik | 2.00458033 | 0.0153953  |
| 100861610 | Gm21075       | 5.3238032  | 0.01541928 |
| 66166     | S100a14       | 1.52796196 | 0.01545133 |
| 17829     | Muc1          | 1.54331889 | 0.01545133 |
| 13087     | Cyp2a5        | -2.5738771 | 0.01545133 |
| 67451     | Pkp2          | 0.41612156 | 0.01545133 |
| 20054     | Rps15         | 0.55981069 | 0.01545516 |
| 67771     | Arpc5         | 0.58559432 | 0.01547242 |

|           |          |            |            |
|-----------|----------|------------|------------|
| 668829    | Gm9385   | 0.54789813 | 0.01548594 |
| 276950    | Slfn8    | 2.64865635 | 0.01560092 |
| 12534     | Cdk1     | 2.03611676 | 0.01561814 |
| 13197     | Gadd45a  | 0.69656123 | 0.01563802 |
| 11608     | Agtr1b   | -3.3986286 | 0.01565725 |
| 217344    | Rhbdf2   | 0.88493854 | 0.01566587 |
| 16196     | Ii7      | 1.32915794 | 0.01569869 |
| 17420     | Mnat1    | 0.60591755 | 0.01569869 |
| 12453     | Ccni     | -0.4331755 | 0.01569869 |
| 107503    | Atf5     | 1.05786811 | 0.01569869 |
| 17194     | Mbl1     | -1.7592093 | 0.01574479 |
| 22248     | Unc119   | 0.70149496 | 0.01574479 |
| 338350    | Acad12   | -1.0459743 | 0.01574479 |
| 234371    | Tmem161a | -0.3534867 | 0.01575236 |
| 27762     | Vwa7     | 1.92396722 | 0.01575322 |
| 17864     | Mybl1    | 1.7857722  | 0.01575322 |
| 235505    | Cd109    | 2.70421727 | 0.01575322 |
| 108853    | Mtrf1l   | -0.6333396 | 0.01575322 |
| 11605     | Gla      | 0.64147724 | 0.01575322 |
| 545156    | Kalrn    | -0.7929153 | 0.01575322 |
| 226351    | Tmem185b | -0.6797451 | 0.01575322 |
| 71562     | Afmid    | -1.6695478 | 0.01575322 |
| 19344     | Rab5b    | -0.3377567 | 0.01575322 |
| 225913    | Tkfc     | -0.7060664 | 0.0157743  |
| 246316    | Lgi2     | 3.62112523 | 0.01578784 |
| 100505224 | NA       | -2.7369844 | 0.01581512 |
| 210853    | Zfp947   | 0.95925499 | 0.01581512 |
| 665903    | Gm7846   | 0.57504046 | 0.01581512 |
| 217125    | Samd14   | 1.15117849 | 0.01581512 |
| 110842    | Etfa     | -1.0459719 | 0.01581512 |
| 56449     | Ybx3     | 0.45300158 | 0.01581512 |
| 100040220 | Gm9892   | 0.68192231 | 0.01581512 |
| 257633    | Acsf3    | -0.9426348 | 0.01581512 |
| 19158     | Cyth2    | 0.57414433 | 0.01581512 |
| 80982     | Cemip    | 4.22356244 | 0.01582479 |
| 433102    | Sfta2    | 1.80826305 | 0.01589394 |
| 73921     | Scpep1os | 1.08399881 | 0.01589394 |
| 60411     | Cenpk    | 1.63077496 | 0.01589394 |
| 69556     | Bod1     | -0.6310492 | 0.01589394 |

|        |               |            |            |
|--------|---------------|------------|------------|
| 69192  | Dhx16         | -0.2784924 | 0.01589394 |
| 72900  | Ndufv2        | -0.4207639 | 0.01593857 |
| 665689 | Gm12663       | -0.6513584 | 0.01602325 |
| 19108  | Prkx          | 0.61603724 | 0.01613568 |
| 56727  | Miox          | -1.7820445 | 0.01618476 |
| 50911  | Exosc9        | 0.70841178 | 0.01620845 |
| 225283 | Rprd1a        | -0.4601251 | 0.01622564 |
| 12447  | Ccne1         | 1.82026301 | 0.01623073 |
| 22341  | Vegfc         | -0.9422642 | 0.01623219 |
| 72400  | Pinx1         | 0.81846959 | 0.01623219 |
| 18190  | Nrxn2         | 1.28061221 | 0.01623219 |
| 27984  | Efhd2         | 1.16655622 | 0.01623219 |
| 71382  | Pex1          | -0.788798  | 0.01629544 |
| 94216  | Col4a6        | 2.31106663 | 0.01633612 |
| 619301 | Tmem253       | 0.88675499 | 0.01633612 |
| 77583  | Notum         | -1.6824977 | 0.01633612 |
| 18975  | Polg          | -0.363962  | 0.01633612 |
| 76303  | Osbp          | -0.2807228 | 0.01633612 |
| 68026  | 2810417H13Rik | 1.1702373  | 0.01637809 |
| 68070  | Pdzd2         | -1.4817335 | 0.01637809 |
| 52840  | Dbndd2        | 0.76954986 | 0.01639232 |
| 28077  | Med10         | 0.58822482 | 0.01642587 |
| 54135  | Lsr           | 0.86728621 | 0.01647228 |
| 225651 | Mppe1         | -0.5222349 | 0.01648777 |
| 242864 | Napepld       | -0.5429262 | 0.01651278 |
| 107995 | Cdc20         | 1.85267266 | 0.01651797 |
| 11807  | Apoa2         | 2.04209535 | 0.01654717 |
| 12575  | Cdkn1a        | 1.61090125 | 0.01654717 |
| 21973  | Top2a         | 1.77142577 | 0.01655018 |
| 233208 | Scaf1         | 0.35733502 | 0.01661668 |
| 71797  | Chst13        | 1.17815393 | 0.01665605 |
| 67311  | Nanp          | -0.8015368 | 0.01665605 |
| 75736  | Bcl2l12       | 0.51807289 | 0.01665605 |
| 434782 | Gm5637        | 1.42797904 | 0.01665605 |
| 68015  | Trap1         | -0.836756  | 0.01665605 |
| 74747  | Ddit4         | 1.33106663 | 0.01665605 |
| 80515  | Chd3os        | -1.1855248 | 0.01666197 |
| 11757  | Prdx3         | -0.8326872 | 0.01666197 |
| 16174  | Il18rap       | 3.13208203 | 0.01666224 |



|           |            |            |            |
|-----------|------------|------------|------------|
| 207806    | Gm608      | -0.5989007 | 0.01669482 |
| 70155     | Ogfrl1     | 0.93271979 | 0.01670483 |
| 109901    | Cela1      | -1.2061024 | 0.01672409 |
| 195564    | Skint3     | 4.39296218 | 0.01677127 |
| 110695    | Aldh7a1    | -1.0912088 | 0.01678477 |
| 18938     | Ppp1r14b   | 1.03843804 | 0.01678477 |
| 11844     | Arf5       | 0.43467563 | 0.01678477 |
| 320802    | Ifitm10    | 2.13668955 | 0.01679003 |
| 15445     | Hpd        | -3.666459  | 0.01679724 |
| 14184     | Fgfr3      | -1.0449981 | 0.01685581 |
| 210710    | Gab3       | 1.8564088  | 0.01686112 |
| 26381     | Esrrg      | -0.6214415 | 0.01686112 |
| 18806     | Pld2       | 1.00559995 | 0.01691698 |
| 74302     | Mtmr3      | -0.3297589 | 0.01691698 |
| 71755     | Dhdh       | -0.6608919 | 0.01698332 |
| 66412     | Arrdc4     | 0.76807995 | 0.01701447 |
| 18194     | Nsdhl      | -0.7720493 | 0.01701447 |
| 18645     | Pfn2       | 0.51493978 | 0.01701755 |
| 625631    | Bloc1s2-ps | 0.96168696 | 0.0170262  |
| 73447     | Wdr13      | -0.4451349 | 0.0170262  |
| 12311     | Calcr      | 1.37745476 | 0.01703117 |
| 53619     | Blcap      | 0.38089291 | 0.01703117 |
| 66904     | Pccb       | -0.73701   | 0.01703611 |
| 381104    | Prickle4   | -2.5126479 | 0.0170742  |
| 330122    | Cxcl3      | 3.17112211 | 0.0170742  |
| 99712     | Cept1      | -0.3781924 | 0.0170742  |
| 629967    | Gm11677    | -2.8474088 | 0.01710023 |
| 74354     | Lrguk      | 1.2169267  | 0.01710023 |
| 434156    | Eid2b      | -0.4930347 | 0.01710023 |
| 100043497 | Gm4477     | -3.3226218 | 0.01710023 |
| 64384     | Sirt3      | -1.1203875 | 0.01710242 |
| 83453     | Chrdl1     | -2.172096  | 0.01717192 |
| 70683     | Utp20      | -0.856108  | 0.01717192 |
| 100503907 | Gm19955    | 3.41656279 | 0.01721068 |
| 72640     | Mex3a      | 0.9681181  | 0.01721068 |
| 245841    | Polr2h     | 0.50336369 | 0.01721068 |
| 50790     | Acsl4      | 1.03159126 | 0.01721068 |
| 236732    | Rbm10      | -0.4550969 | 0.01724008 |
| 66690     | Tmem186    | -0.4765983 | 0.01725313 |

|           |               |            |            |
|-----------|---------------|------------|------------|
| 225908    | Myrf          | 1.0935774  | 0.01727538 |
| 15277     | Hk2           | 1.87701476 | 0.01727555 |
| 246081    | Defb11        | 3.54071695 | 0.01731801 |
| 23880     | Fyb           | 1.74627577 | 0.01731801 |
| 69151     | Lzic          | 0.47688251 | 0.01731801 |
| 232430    | Crebl2        | -0.6297527 | 0.01731801 |
| 227800    | Rabgap1       | 0.29231055 | 0.01731801 |
| 19271     | Ptprj         | 0.47905853 | 0.01731801 |
| 212980    | Slc45a3       | -0.7599539 | 0.01737784 |
| 19229     | Ptk2b         | -0.5071471 | 0.01737784 |
| 68493     | Ndufaf4       | -0.9843593 | 0.01740277 |
| 80720     | Pbx4          | 3.14776178 | 0.01742522 |
| 69536     | Hemk1         | -0.5304893 | 0.01742522 |
| 16988     | Lst1          | 1.59396341 | 0.01744115 |
| 100126034 | Gm10644       | -1.3983484 | 0.01753089 |
| 14933     | Gk            | -1.2768587 | 0.01753089 |
| 266614    | Ly6g5b        | 1.3494036  | 0.01758308 |
| 71183     | Clec12b       | 4.43722301 | 0.01761872 |
| 225724    | Mapk4         | 0.67772215 | 0.01762239 |
| 22323     | Vasp          | 0.77691222 | 0.01765528 |
| 18037     | Nfkbie        | 1.09411876 | 0.01769571 |
| 101240    | Wdr91         | -0.5942475 | 0.01775597 |
| 227937    | Pkp4          | -0.5665157 | 0.01776316 |
| 13215     | Defb2         | 1.61939851 | 0.01781318 |
| 20450     | St8sia2       | 2.43536905 | 0.01781318 |
| 17345     | Mki67         | 1.51508213 | 0.01781318 |
| 16869     | Lhx1          | -0.7574623 | 0.01781318 |
| 50754     | Fbxw7         | 0.72170133 | 0.0178166  |
| 68371     | Pbld1         | -1.5223389 | 0.01781851 |
| 224523    | 4732491K20Rik | 0.68828225 | 0.017819   |
| 224796    | Clic5         | -0.6402034 | 0.01782328 |
| 100040123 | Gm2614        | 0.43400683 | 0.0178288  |
| 229524    | Msto1         | 0.55060237 | 0.01784852 |
| 110308    | Krt5          | 4.87265061 | 0.01788279 |
| 70892     | Tll7          | 0.73531036 | 0.01788279 |
| 353169    | Slc2a12       | -1.2958311 | 0.01788279 |
| 116903    | Calcb         | 3.35736754 | 0.01788384 |
| 18163     | Ctnnd2        | 2.66941681 | 0.01788384 |
| 434800    | Smim9         | 3.02442997 | 0.01788384 |

|           |            |            |            |
|-----------|------------|------------|------------|
| 71997     | Smg9       | 0.44141363 | 0.01788384 |
| 21859     | Timp3      | -1.5831056 | 0.01788384 |
| 18764     | Pkd2       | -0.6656236 | 0.01788384 |
| 214899    | Kdm5a      | 0.54770386 | 0.01788384 |
| 55949     | Eef1b2     | 0.435375   | 0.0178923  |
| 55938     | Apom       | -1.917664  | 0.0178923  |
| 83964     | Jam3       | -0.6681903 | 0.01789701 |
| 74257     | Tspan17    | 0.92182171 | 0.01803824 |
| 69453     | Prss56     | 3.94984437 | 0.01804736 |
| 103537    | Mbtd1      | 0.34620065 | 0.01804736 |
| 66922     | Rras2      | 0.53487804 | 0.01806002 |
| 71883     | Coq2       | -0.6241487 | 0.01807361 |
| 270086    | Ogfod1     | -0.4527837 | 0.01815757 |
| 14934     | Gypa       | -3.3393335 | 0.01823357 |
| 380824    | Ighv1-66   | -2.9372227 | 0.01836873 |
| 55942     | Sertad1    | 0.65415565 | 0.01837545 |
| 17220     | Mcm7       | 0.72184446 | 0.01837854 |
| 26401     | Map3k1     | 0.98610435 | 0.01839698 |
| 268482    | Krt12      | 3.39720219 | 0.01847332 |
| 100862237 | NA         | 4.32480828 | 0.01847332 |
| 14087     | Fanca      | 1.41412601 | 0.01847332 |
| 231830    | Micall2    | 1.36909336 | 0.01847332 |
| 380863    | Tmem171    | 1.42490288 | 0.01847332 |
| 22143     | Tuba1b     | 0.66802733 | 0.01852548 |
| 16410     | Itgav      | 0.54230082 | 0.01852548 |
| 76900     | Ssbp4      | 1.25774269 | 0.01852774 |
| 211651    | Fancd2     | 1.55920918 | 0.01854149 |
| 100503724 | Dnajc19-ps | -1.195389  | 0.01855353 |
| 100502766 | Kifc1      | 1.3484997  | 0.01857906 |
| 17698     | Msn        | 0.85522882 | 0.01862346 |
| 18158     | Nppb       | 3.03254927 | 0.0186294  |
| 18759     | Prkci      | 0.46309619 | 0.0186294  |
| 217847    | Serpina10  | 2.34989875 | 0.01863336 |
| 78655     | Eif3j1     | 1.00278705 | 0.01870685 |
| 268930    | Pkmyt1     | 1.67746875 | 0.01870851 |
| 229487    | Gatb       | -1.18956   | 0.01870891 |
| 327959    | Xaf1       | -1.3862958 | 0.01872417 |
| 13370     | Dio1       | -3.0642254 | 0.01872417 |
| 67163     | Ccdc47     | -0.4232034 | 0.01874753 |

|           |               |            |            |
|-----------|---------------|------------|------------|
| 20531     | Slc34a2       | 1.78501259 | 0.01878472 |
| 100042173 | Rps15a-ps6    | -1.3127117 | 0.01879138 |
| 27221     | Chaf1a        | 1.27680372 | 0.01880125 |
| 226646    | Ndufs2        | -0.4949868 | 0.01880125 |
| 216161    | Sbno2         | 0.98992858 | 0.01880125 |
| 109299    | C330006A16Rik | -0.357367  | 0.01888355 |
| 18720     | Pip5k1a       | 0.40353831 | 0.01888875 |
| 667035    | Gm8430        | 0.38072185 | 0.01891066 |
| 58208     | Bcl11b        | -1.0388188 | 0.01896544 |
| 76846     | Rps9          | 0.56832667 | 0.01896544 |
| 14069     | F8            | -1.0174576 | 0.01898649 |
| 71819     | Kif23         | 1.59744312 | 0.01899029 |
| 74386     | Rmi1          | -0.5596719 | 0.01899029 |
| 77422     | C330018D20Rik | -0.6417629 | 0.01899029 |
| 70005     | Znf41-ps      | 1.13995383 | 0.01900926 |
| 67978     | Tctn2         | -0.4004082 | 0.01900926 |
| 320438    | Alg6          | 0.68693546 | 0.01901324 |
| 12306     | Anxa2         | 2.13127302 | 0.01901324 |
| 101869    | Unc45a        | 0.37089646 | 0.01902188 |
| 73852     | D3Erttd751e   | -0.9269156 | 0.01904549 |
| 22030     | Traf2         | 0.61584741 | 0.01907031 |
| 14283     | Fosl1         | 3.37215674 | 0.01909458 |
| 667410    | Gm8615        | -1.6033536 | 0.01915093 |
| 415115    | Neur12        | 1.17227037 | 0.01917832 |
| 213084    | Cdkl3         | 0.92489002 | 0.01917832 |
| 50721     | Sirt6         | 0.52197129 | 0.01917832 |
| 14787     | Rhpn1         | -0.6616975 | 0.01917832 |
| 14409     | Gabbr2        | -2.0585279 | 0.01921604 |
| 627626    | Ptchd4        | 2.33999886 | 0.0192201  |
| 68576     | Lamtor5       | -0.6352988 | 0.0192201  |
| 73824     | Snhg6         | 0.82322771 | 0.01935808 |
| 20440     | St6gal1       | 1.03871473 | 0.01936389 |
| 71795     | Pitpnc1       | -0.4422795 | 0.01936389 |
| 30805     | Slc22a4       | -1.1497629 | 0.019379   |
| 230991    | B930041F14Rik | 1.27580597 | 0.01939146 |
| 13169     | Dbnl          | 0.30065634 | 0.01941452 |
| 171531    | Mlph          | 1.04328004 | 0.01942619 |
| 223650    | Eppk1         | 1.82015278 | 0.01943289 |
| 227377    | Farp2         | -0.6492008 | 0.01943289 |

|           |          |            |            |
|-----------|----------|------------|------------|
| 24088     | Tlr2     | 2.17065996 | 0.01949368 |
| 277353    | Tcf15    | 4.30496569 | 0.01949814 |
| 12028     | Bax      | 0.78730456 | 0.01949814 |
| 100217465 | Snord111 | 2.53639347 | 0.01950257 |
| 71365     | Pdss2    | -1.0725428 | 0.01950257 |
| 212442    | Lactb2   | -1.594972  | 0.01950257 |
| 71538     | Fbxo9    | -0.7853674 | 0.01950257 |
| 14874     | Gstz1    | -1.0823248 | 0.01951314 |
| 67661     | Ift172   | -0.4116317 | 0.0195354  |
| 19724     | Rfx1     | -0.3457793 | 0.01953771 |
| 19361     | Rad51    | 2.03138185 | 0.01958086 |
| 107351    | Kank1    | -0.4927422 | 0.01967041 |
| 625360    | BC147527 | 2.6441895  | 0.01967863 |
| 228536    | Bahd1    | 0.5125478  | 0.01968083 |
| 269582    | Clsn     | 1.87988565 | 0.01979411 |
| 103768    | Tubg2    | 1.41882958 | 0.01980446 |
| 667118    | Zbed6    | 1.14118686 | 0.01987467 |
| 16599     | Klf3     | 0.72360422 | 0.01987467 |
| 56412     | Noa1     | -0.8298015 | 0.01987467 |
| 208665    | Akr1d1   | -1.8277054 | 0.01993052 |
| 68631     | Cryl1    | -0.7695084 | 0.01993052 |
| 71817     | Tmem50a  | 0.45005486 | 0.01993052 |
| 433752    | AA415398 | -0.8198666 | 0.02001277 |
| 17869     | Myc      | 1.2295545  | 0.02001284 |
| 69309     | Slc16a13 | -1.4535857 | 0.02001284 |
| 230514    | Leprot   | 0.66339411 | 0.02001284 |
| 235339    | Dlat     | -0.6790411 | 0.02003184 |
| 232493    | Gys2     | -2.5193432 | 0.02004843 |
| 67196     | Ube2t    | 1.95662192 | 0.02008385 |
| 60345     | Nrip2    | 1.38773523 | 0.02008385 |
| 243846    | Ccdc9    | 0.68658973 | 0.02008385 |
| 14919     | Gucy2e   | 5.25346611 | 0.0201068  |
| 12236     | Bub1b    | 2.29439131 | 0.020132   |
| 72554     | Utp14a   | 0.51563522 | 0.020132   |
| 94061     | Mrpl1    | -0.6088171 | 0.020132   |
| 18739     | Pitpnm1  | 0.65460781 | 0.020132   |
| 22183     | Zrsr1    | -0.4211598 | 0.020132   |
| 12630     | Cfi      | 3.05776159 | 0.02014567 |
| 18082     | Nipsnap1 | -0.7738964 | 0.02020423 |

|           |               |            |            |
|-----------|---------------|------------|------------|
| 67267     | Uqcc2         | 0.61119076 | 0.02020423 |
| 385109    | Igkv4-72      | -1.6897154 | 0.0203167  |
| 16181     | Il1rn         | 2.92609131 | 0.0203167  |
| 67039     | Rbm25         | 0.56066728 | 0.0203167  |
| 76411     | Ift43         | 0.55732495 | 0.02032227 |
| 22273     | Uqcrc1        | -0.6702669 | 0.02032834 |
| 100217469 | Snord91a      | -1.9132467 | 0.02038881 |
| 69617     | Pitrm1        | -0.599491  | 0.02042204 |
| 12660     | Chka          | 0.39532215 | 0.02051924 |
| 229473    | D930015E06Rik | 0.70016698 | 0.02061562 |
| 74637     | Shpk          | -0.6031775 | 0.02061562 |
| 107771    | Bmyc          | 0.76123463 | 0.02064466 |
| 214230    | Pak6          | 1.68479249 | 0.02064466 |
| 16763     | Lad1          | 0.87968405 | 0.02064466 |
| 12927     | Bcar1         | 0.51764306 | 0.02064466 |
| 67116     | Cuedc2        | 0.78334002 | 0.02064466 |
| 331401    | Thoc2         | 0.35780529 | 0.02064525 |
| 319184    | Hist1h2bk     | -1.6502989 | 0.02072238 |
| 93674     | Cml3          | -2.8843757 | 0.02072238 |
| 433224    | Gm5512        | -1.0564075 | 0.02072238 |
| 110265    | Msra          | -1.0128175 | 0.02072238 |
| 50927     | Nasp          | 0.34864065 | 0.02072238 |
| 68636     | Fahd1         | -0.6707247 | 0.02072238 |
| 68750     | Rreb1         | -0.5308694 | 0.02072238 |
| 16475     | Ajuba         | 0.88922954 | 0.02072238 |
| 100316713 | Mir1968       | -3.0719286 | 0.02097943 |
| 170721    | Papln         | 1.54038811 | 0.02097943 |
| 80915     | Dusp12        | -0.4180947 | 0.02097943 |
| 20658     | Son           | 0.29964909 | 0.02097943 |
| 72129     | Pex13         | -0.5510379 | 0.02097943 |
| 99586     | Dpyd          | -0.7926264 | 0.02097943 |
| 67445     | C1qtnf4       | 0.97504871 | 0.02098892 |
| 218232    | Ptpdc1        | -0.7104968 | 0.02098892 |
| 100043670 | Gm4581        | 0.74456283 | 0.02098892 |
| 20733     | Spint2        | 0.65585763 | 0.02103458 |
| 231003    | Klhl17        | -0.4754339 | 0.02103458 |
| 67789     | Dalrd3        | -0.6122323 | 0.02103458 |
| 20266     | Scn1b         | 1.63650051 | 0.0210497  |
| 242122    | Vtcn1         | 1.81391727 | 0.02116266 |

|           |          |            |            |
|-----------|----------|------------|------------|
| 17768     | Mthfd2   | 1.09470007 | 0.02126409 |
| 226153    | Peo1     | -0.5051132 | 0.02129114 |
| 75725     | Phf14    | 0.39046821 | 0.02129241 |
| 18639     | Pfkfb1   | 1.03289607 | 0.02141769 |
| 100502673 | Gm19316  | -3.1729554 | 0.02141769 |
| 16976     | Lrpap1   | -1.1467837 | 0.02141769 |
| 53978     | Lpar2    | 0.8892254  | 0.02143041 |
| 72075     | Ogfr     | 0.44087081 | 0.02143041 |
| 56440     | Snx1     | -0.3851104 | 0.02144486 |
| 108911    | Rcc2     | 0.55142183 | 0.02144486 |
| 76894     | Mettl15  | -0.7782978 | 0.02148542 |
| 20522     | Slc23a1  | -1.0410795 | 0.02149232 |
| 54445     | Unc93b1  | 0.57528831 | 0.0215345  |
| 109218    | Tmem139  | -1.0973093 | 0.021754   |
| 11656     | Alas2    | -5.5938582 | 0.02177672 |
| 232664    | Ccdc136  | 1.26056855 | 0.02186039 |
| 102545    | Cmtm7    | 0.72949427 | 0.02191925 |
| 228869    | Ncoa5    | -0.3228389 | 0.02196145 |
| 231326    | Aasdh    | -0.5354248 | 0.0220012  |
| 110391    | Qdpr     | -0.8494472 | 0.02200652 |
| 106389    | Eaf2     | -0.6692349 | 0.0220337  |
| 101613    | Nlrp6    | -1.1817033 | 0.0220337  |
| 433287    | Gm15455  | -0.4127949 | 0.02209136 |
| 233890    | Zfp768   | -0.476092  | 0.02211134 |
| 668727    | Mrgpra2a | -2.4318583 | 0.02211343 |
| 56222     | Cited4   | 0.89229238 | 0.02211343 |
| 100504195 | Micalcl  | -1.691989  | 0.02214682 |
| 232933    | Ccdc61   | 0.8082226  | 0.02219324 |
| 56774     | Slc6a14  | 3.56416415 | 0.02222166 |
| 269951    | ldh2     | -0.7452991 | 0.02222166 |
| 18987     | Pou2f2   | 1.27054227 | 0.02226843 |
| 245867    | Pcmt2    | -0.3871821 | 0.02228624 |
| 97827     | Exd2     | -0.3454276 | 0.02229217 |
| 14284     | Fosl2    | 1.18728809 | 0.02239704 |
| 13433     | Dnmt1    | 0.40609867 | 0.02241824 |
| 100503471 | Gm15867  | 2.81263722 | 0.02244433 |
| 73833     | Fam98c   | 0.61146122 | 0.02244433 |
| 72119     | Tpx2     | 1.77406409 | 0.02257519 |
| 212974    | Athl1    | -0.4808079 | 0.02257519 |

|           |               |            |            |
|-----------|---------------|------------|------------|
| 76507     | Aoc1          | 1.53654168 | 0.0225839  |
| 14688     | Gnb1          | 0.26928655 | 0.02261687 |
| 213522    | Plekhg6       | 0.71745772 | 0.02263835 |
| 71887     | Ppm1j         | 1.40551888 | 0.0227091  |
| 100041649 | Mpc1-ps       | -0.9304989 | 0.02280382 |
| 56397     | Morf4l2       | 0.43808745 | 0.02280382 |
| 11797     | Birc2         | 0.42376018 | 0.02281561 |
| 19858     | Rnu3b1        | 3.88925239 | 0.02286456 |
| 235132    | Zbtb44        | -0.6412232 | 0.02286456 |
| 231583    | Slc26a1       | -1.8194361 | 0.02289454 |
| 381738    | Drc1          | 1.94300187 | 0.02306688 |
| 27222     | Atp1a4        | -1.3912873 | 0.02307709 |
| 68310     | Zmym1         | -0.6603429 | 0.02307709 |
| 83965     | Enpp5         | -0.433808  | 0.02311101 |
| 12394     | Runx1         | 2.0930275  | 0.02316411 |
| 104479    | Ccdc117       | -0.4532961 | 0.02318652 |
| 19186     | Psme1         | 0.68938222 | 0.02318956 |
| 217119    | Xylt2         | -0.2877933 | 0.02325782 |
| 52076     | Tmem38b       | -0.5923956 | 0.02325782 |
| 15395     | Hoxa10        | -0.3961195 | 0.0232625  |
| 654467    | Gm10052       | 0.57610464 | 0.02327686 |
| 385277    | Igkv4-60      | -2.5736193 | 0.02333004 |
| 66205     | Cd302         | -0.9863971 | 0.02333004 |
| 76137     | Mcur1         | -0.8880845 | 0.02333004 |
| 142682    | Zcchc14       | -0.5314709 | 0.02344735 |
| 22695     | Zfp36         | 0.64021136 | 0.02347409 |
| 17761     | Map7          | -0.8774554 | 0.02347595 |
| 16211     | Kpnb1         | 0.32233546 | 0.02348538 |
| 57429     | Sult5a1       | 2.60076123 | 0.02348841 |
| 104831    | Ptpn23        | 0.63444721 | 0.02352256 |
| 100862170 | NA            | 3.34172321 | 0.02359079 |
| 20280     | Scp2          | -0.8866937 | 0.02359079 |
| 240753    | Plekha6       | -0.9868244 | 0.02359079 |
| 218977    | Dlgap5        | 2.22718    | 0.02363337 |
| 246691    | Prok1         | -2.2220583 | 0.0236472  |
| 66931     | 1700010114Rik | 1.24132672 | 0.0236472  |
| 13829     | Dmtn          | -0.6031741 | 0.0236472  |
| 170749    | Mtmr4         | -0.5579486 | 0.0236472  |
| 194974    | Sun3          | -1.7719682 | 0.02368322 |



|           |               |            |            |
|-----------|---------------|------------|------------|
| 77533     | C030034I22Rik | 0.84000832 | 0.02368322 |
| 232210    | Hmces         | 0.35750389 | 0.02368322 |
| 99334     | Zscan29       | -0.3206547 | 0.02368322 |
| 19651     | Rbl2          | -0.6333203 | 0.02368322 |
| 105675    | Ppif          | -0.6405199 | 0.02369774 |
| 231807    | BC037034      | -0.2730907 | 0.02373239 |
| 17750     | Mt2           | 2.17971727 | 0.02373239 |
| 667063    | Gm8439        | 3.57305352 | 0.02381717 |
| 192173    | Fam195b       | 0.53921724 | 0.02387901 |
| 19989     | Rpl7          | 0.33550557 | 0.02388234 |
| 17279     | Melk          | 1.95527696 | 0.02389226 |
| 69786     | Tprkb         | -0.7625849 | 0.02391568 |
| 75801     | 4930447C04Rik | -2.344066  | 0.02393761 |
| 18226     | Nup62         | 0.34463255 | 0.02395473 |
| 231413    | Grsf1         | -0.8191367 | 0.02395907 |
| 18027     | Nfia          | -0.5759626 | 0.02399407 |
| 328563    | Apol11b       | -3.3757861 | 0.02402979 |
| 52855     | Lair1         | 1.56372289 | 0.02402979 |
| 216858    | Kctd11        | 1.10334402 | 0.02402979 |
| 102614    | Rpp25         | 1.34842362 | 0.02403702 |
| 333050    | Ksr2          | -2.4267226 | 0.02404311 |
| 67886     | Camsap2       | -0.4705036 | 0.02404311 |
| 21929     | Tnfaip3       | 1.16709833 | 0.0240695  |
| 68480     | 1110007C09Rik | 0.55541148 | 0.0240695  |
| 63955     | Cables1       | -0.8531552 | 0.02408557 |
| 70591     | 5730455P16Rik | -0.3567026 | 0.02410077 |
| 233765    | Plekha7       | -0.5200986 | 0.02417458 |
| 320256    | Dlec1         | -0.5615829 | 0.02417458 |
| 18618     | Pemt          | 0.7984692  | 0.02418194 |
| 620678    | Gm12174       | 0.50590282 | 0.02418913 |
| 100042074 | Gm3650        | -1.0272098 | 0.0242048  |
| 66302     | Rmdn1         | -0.5798896 | 0.0242048  |
| 66646     | Rpe           | -0.5350156 | 0.0242048  |
| 59003     | Maea          | 0.29075636 | 0.0242048  |
| 11821     | Aprt          | 0.9273184  | 0.0242048  |
| 26366     | Ceacam10      | -1.7160999 | 0.02420668 |
| 210982    | Gltscr1l      | -0.411844  | 0.02420668 |
| 72190     | 2510009E07Rik | -0.554595  | 0.02420668 |
| 12227     | Btg2          | 1.63794273 | 0.02420668 |

|           |               |            |            |
|-----------|---------------|------------|------------|
| 60599     | Trp53inp1     | 0.89485569 | 0.02420668 |
| 67997     | Ddx59         | -0.5379632 | 0.02421374 |
| 18212     | Ntrk2         | -3.7509362 | 0.02422318 |
| 67426     | Adck3         | -0.6001429 | 0.02422318 |
| 94112     | Med15         | 0.34985974 | 0.02429582 |
| 74772     | Atp13a2       | 0.27040156 | 0.0243076  |
| 118446    | Gjc3          | -2.4318583 | 0.02433026 |
| 56150     | Mad2l1        | 0.84565493 | 0.02433026 |
| 402734    | C730036E19Rik | 1.01810508 | 0.02434026 |
| 319224    | 6330410L21Rik | -2.3725566 | 0.02434283 |
| 20505     | Slc34a1       | -1.4595555 | 0.02434283 |
| 14385     | Slc37a4       | -1.131143  | 0.02434283 |
| 24017     | Rnf13         | -0.4593011 | 0.02434283 |
| 100041194 | Ahnak2        | 1.60672234 | 0.02436212 |
| 229595    | Adamtsl4      | 1.96440878 | 0.02436212 |
| 320024    | Nceh1         | -0.5917981 | 0.02436212 |
| 67283     | Slc25a19      | -0.7092151 | 0.02436212 |
| 230721    | Pabpc4        | 0.5525557  | 0.02440977 |
| 20418     | Shc3          | -3.9321692 | 0.02446673 |
| 80892     | Zfhx4         | 2.02473332 | 0.02446673 |
| 12235     | Bub1          | 1.9560336  | 0.02446673 |
| 240261    | Ccdc112       | 1.17639539 | 0.02446673 |
| 217708    | Lin52         | -0.7529613 | 0.02446673 |
| 27410     | Abca3         | -1.2163218 | 0.02446673 |
| 12648     | Chd1          | -0.3249929 | 0.02446673 |
| 66394     | Nosip         | 0.39127188 | 0.02446673 |
| 100039571 | Gm10335       | 0.38413939 | 0.02446673 |
| 18451     | P4ha1         | -0.7246795 | 0.02446673 |
| 26562     | Ncdn          | 0.46885164 | 0.02447025 |
| 14620     | Gjb3          | 3.03364902 | 0.02449133 |
| 99382     | Abtb2         | -0.6327136 | 0.02449133 |
| 735259    | Mir670        | -2.2447425 | 0.02452738 |
| 11740     | Slc25a5       | -0.5005765 | 0.02453841 |
| 12363     | Casp4         | 1.74652733 | 0.02456155 |
| 230558    | C8a           | -2.0268863 | 0.0246739  |
| 320747    | Lingo4        | 2.13715524 | 0.02469388 |
| 56752     | Aldh9a1       | -1.2031053 | 0.02469388 |
| 117591    | Slc2a9        | 0.76043822 | 0.02469388 |
| 74166     | Tmem38a       | 0.66737699 | 0.02473763 |

|           |           |            |            |
|-----------|-----------|------------|------------|
| 77864     | Ypel2     | 1.09479054 | 0.02473763 |
| 69928     | Apitd1    | 1.57306251 | 0.02473837 |
| 232313    | Gxylt2    | 3.71739999 | 0.02480035 |
| 94218     | Cnm3      | -0.3244949 | 0.02480035 |
| 22121     | Rpl13a    | 0.83758297 | 0.02480035 |
| 105853    | Mal2      | 0.96010061 | 0.02480035 |
| 76088     | Dock8     | -0.547688  | 0.02480035 |
| 320604    | Ccdc169   | -3.7160279 | 0.02483648 |
| 234839    | Piezo1    | 0.77518353 | 0.02484352 |
| 23872     | Ets2      | 0.39897323 | 0.0249265  |
| 230596    | Prpf38a   | 0.29460151 | 0.02497289 |
| 239719    | Mkl2      | 0.41407159 | 0.02497289 |
| 18552     | Pcsk5     | -0.5953104 | 0.02497289 |
| 56485     | Slc2a5    | -1.1835557 | 0.02497289 |
| 21405     | Hnf1a     | -0.9485474 | 0.02497289 |
| 71091     | Cdkl1     | -0.8806942 | 0.0249778  |
| 171206    | Vmn1r27   | -2.3428662 | 0.02500567 |
| 93834     | Peli2     | -0.8012223 | 0.02514295 |
| 625732    | Gm11893   | -2.0740331 | 0.02520657 |
| 100504341 | Gm20184   | 2.20972181 | 0.02520657 |
| 170772    | Glcci1    | -0.4947514 | 0.02520657 |
| 228852    | Ppp1r16b  | -1.4601315 | 0.02520657 |
| 52633     | Nit2      | -1.0046519 | 0.02520664 |
| 52793     | Fam3b     | 3.35457374 | 0.02534187 |
| 69923     | Agk       | -0.4911155 | 0.02540897 |
| 83671     | Sytl2     | 1.79549605 | 0.02542736 |
| 100503862 | Gm19932   | 3.55147676 | 0.02545349 |
| 665622    | Hist1h2br | -2.0122544 | 0.02545349 |
| 27053     | Asns      | 0.69868022 | 0.02545349 |
| 15415     | Hoxb7     | 0.39367092 | 0.02545349 |
| 74978     | Lrriq1    | 1.44270656 | 0.02546286 |
| 268782    | Agxt2     | -1.2937743 | 0.02547594 |
| 66075     | Chchd3    | -0.5359993 | 0.02550794 |
| 666485    | Gm8127    | 3.50947804 | 0.0255235  |
| 14362     | Fzd1      | -0.7159992 | 0.0255235  |
| 242700    | Ifnlr1    | 0.66334785 | 0.02568204 |
| 320720    | Fastkd1   | -0.7406753 | 0.02578883 |
| 76614     | Immt      | -0.60563   | 0.02579195 |
| 107932    | Chd4      | 0.37188235 | 0.0258034  |

|           |               |            |            |
|-----------|---------------|------------|------------|
| 66333     | Aqp11         | -1.0016626 | 0.02583127 |
| 54375     | Azin1         | -0.4205534 | 0.02589886 |
| 22691     | Zscan2        | 0.56252949 | 0.02604397 |
| 54216     | Pcdh7         | 2.02306827 | 0.02607243 |
| 216892    | Spns2         | 1.35816066 | 0.02607243 |
| 15013     | H2-Q2         | 1.75449423 | 0.02611646 |
| 12929     | Crkl          | -0.4385553 | 0.02611646 |
| 70617     | 5730508B09Rik | 1.13853757 | 0.02614062 |
| 237320    | Aldh8a1       | -1.4834038 | 0.02614062 |
| 20439     | Siah2         | -0.8407402 | 0.02616429 |
| 75608     | Chmp4b        | 0.44423561 | 0.02617592 |
| 13356     | Dgcr2         | -0.4517547 | 0.02617592 |
| 675713    | Gm17758       | 2.42930049 | 0.02617987 |
| 54648     | Ccdc120       | 0.74650398 | 0.02617987 |
| 269587    | Epb4.1        | -0.5547655 | 0.02617987 |
| 30962     | Slc7a9        | -0.8247973 | 0.02617987 |
| 67772     | Chd8          | 0.32445399 | 0.02617987 |
| 216616    | Efemp1        | 1.11263577 | 0.02618074 |
| 217698    | Acot5         | 1.32044068 | 0.02621307 |
| 12182     | Bst1          | 4.32334084 | 0.02621502 |
| 243743    | Plxna4        | -1.1271828 | 0.02635252 |
| 73474     | Snhg9         | 2.61259641 | 0.02643191 |
| 12737     | Cldn1         | 1.30434272 | 0.02643191 |
| 20382     | Srsf2         | -0.3332056 | 0.02648307 |
| 20911     | Stxbp2        | 0.53552701 | 0.02648307 |
| 29858     | Pmm1          | 0.64948739 | 0.02652904 |
| 544763    | Hbq1b         | -3.4586941 | 0.0265333  |
| 68725     | 1110032F04Rik | -2.0995106 | 0.02656606 |
| 319646    | D630013N20Rik | -1.0404217 | 0.02674329 |
| 77920     | A330102I10Rik | 3.33329009 | 0.02683635 |
| 73192     | Xpot          | -0.5869783 | 0.02687741 |
| 140474    | Muc4          | 3.96106779 | 0.02691947 |
| 100039123 | Gm14295       | 0.96960455 | 0.02697344 |
| 20148     | Dhrs3         | -0.899794  | 0.0269814  |
| 13195     | Ddc           | -1.1434341 | 0.02704206 |
| 18035     | Nfkbia        | 1.0012899  | 0.0270909  |
| 20969     | Sdc1          | 1.07489135 | 0.02710235 |
| 72296     | Rusc1         | 0.55538306 | 0.02710235 |
| 29816     | Hip1r         | 0.54691099 | 0.02710235 |

|           |               |            |            |
|-----------|---------------|------------|------------|
| 108912    | Cdca2         | 1.24845837 | 0.02717867 |
| 64177     | Trpv6         | 1.16771766 | 0.02717867 |
| 68644     | Abhd14a       | -1.1120714 | 0.02717867 |
| 13638     | Efna3         | 1.71724205 | 0.02718795 |
| 12908     | Crat          | -0.7878065 | 0.02721822 |
| 232087    | Mat2a         | -0.9988159 | 0.02722909 |
| 12505     | Cd44          | 1.80189815 | 0.02728315 |
| 74244     | Atg7          | 0.43218418 | 0.02731851 |
| 52538     | Acaa2         | -1.2211153 | 0.02736385 |
| 21745     | Tep1          | 0.32227629 | 0.02744491 |
| 233274    | Siglech       | -1.8598065 | 0.02747808 |
| 73942     | Fam151b       | -0.6515701 | 0.02747808 |
| 218038    | Amph          | 2.32338185 | 0.0274912  |
| 214895    | Lman2l        | -0.7484134 | 0.0274912  |
| 100316775 | Mir1950       | -2.4622235 | 0.02752298 |
| 100504703 | A730063M14Rik | 0.93777451 | 0.02752298 |
| 14772     | Grk4          | 0.71507592 | 0.02752298 |
| 64452     | Slc5a4a       | -2.2406793 | 0.0275299  |
| 26886     | Cenph         | 1.66373424 | 0.0275299  |
| 668253    | Dleu2         | -0.9227768 | 0.0275299  |
| 68298     | Ncapd2        | 0.55977926 | 0.0275299  |
| 216516    | Ccdc157       | -0.5106906 | 0.0275299  |
| 70472     | Atad2         | 1.05100586 | 0.02762955 |
| 100041677 | Gm13157       | 1.42756406 | 0.02762955 |
| 381822    | 1190002F15Rik | 1.34897086 | 0.02764289 |
| 70839     | P2ry12        | 2.50959708 | 0.02769504 |
| 234788    | Slc38a8       | 2.49439914 | 0.02770484 |
| 243529    | H1fx          | 1.32905497 | 0.02779469 |
| 67013     | Oma1          | -0.4639647 | 0.02780559 |
| 230737    | Gnl2          | 0.31568239 | 0.02780559 |
| 20319     | Sfrp2         | -2.8806672 | 0.02782052 |
| 74376     | Myo18b        | 3.61925772 | 0.0278236  |
| 18049     | Ngf           | 1.98206645 | 0.02785933 |
| 22599     | Slc6a20b      | -1.6545693 | 0.02791894 |
| 667766    | Gm8801        | -2.4968733 | 0.02793212 |
| 105785    | Kdelr3        | 1.92536195 | 0.02797264 |
| 67880     | Dcxr          | -0.5911598 | 0.02797264 |
| 14390     | Gabpa         | -0.581921  | 0.02797264 |
| 72395     | 2610028E06Rik | 3.08228452 | 0.0280056  |

|           |               |            |            |
|-----------|---------------|------------|------------|
| 67027     | Mkrm2         | -0.2640928 | 0.02803545 |
| 214239    | A430105I19Rik | 1.84979007 | 0.02813969 |
| 66199     | Commd4        | 0.43119128 | 0.02820664 |
| 15903     | Id3           | 1.24688456 | 0.02822325 |
| 228785    | Mylk2         | 2.20973705 | 0.02831914 |
| 233987    | Zfp958        | 0.4933294  | 0.02831914 |
| 52552     | Parp8         | 0.70805022 | 0.02831914 |
| 384281    | Gatc          | -0.4115572 | 0.02831914 |
| 15388     | Hnrnp1        | 0.23109318 | 0.02831914 |
| 67863     | Slc25a11      | -0.5627953 | 0.02831914 |
| 12351     | Car4          | -2.0265308 | 0.02831914 |
| 207683    | Igsf11        | -1.0671099 | 0.02831914 |
| 85305     | Kars          | 0.21442884 | 0.02831914 |
| 235574    | Atp2c1        | -0.4689629 | 0.02831914 |
| 218543    | Srek1         | 0.31622425 | 0.02831914 |
| 100862128 | NA            | 1.37228636 | 0.02839307 |
| 108037    | Shmt2         | -1.4649205 | 0.02839307 |
| 71985     | Acad10        | -1.2092404 | 0.02839307 |
| 66854     | Trim35        | 0.66265221 | 0.02839307 |
| 230753    | Thrap3        | 0.31830338 | 0.02839831 |
| 52502     | Carhsp1       | 0.48212264 | 0.02839831 |
| 194952    | Jmjd4         | -0.4183783 | 0.02844858 |
| 20725     | Serpib8       | -0.6073061 | 0.02850282 |
| 50905     | Ii17rb        | 0.64810634 | 0.0285257  |
| 15929     | Idh3g         | -0.7634944 | 0.02858239 |
| 109050    | Fam212b       | 1.15384459 | 0.02860147 |
| 319982    | 5930430L01Rik | 1.86845666 | 0.02863575 |
| 78263     | 4632411P08Rik | 1.51056142 | 0.02869479 |
| 242126    | Slc22a15      | 1.5557742  | 0.02869479 |
| 74116     | Pi16          | -1.7952193 | 0.02869479 |
| 51792     | Ppp2r1a       | 0.30064521 | 0.02869479 |
| 16476     | Jun           | 1.23023558 | 0.02869479 |
| 57138     | Slc12a5       | -1.4090884 | 0.0287182  |
| 74393     | Map10         | -0.6409744 | 0.0287182  |
| 13627     | Eef1a1        | 0.31941015 | 0.0287182  |
| 69666     | Psmg4         | 0.38519396 | 0.02874292 |
| 432466    | Gm5424        | -1.6830162 | 0.02885826 |
| 11765     | Ap1g1         | -0.45862   | 0.02885826 |
| 56786     | Tmem9b        | -0.3390007 | 0.02885826 |

|           |               |            |            |
|-----------|---------------|------------|------------|
| 236690    | Nyx           | 1.41401439 | 0.02893691 |
| 13076     | Cyp1a1        | -2.2447841 | 0.02893691 |
| 68226     | Efcab2        | -0.5970489 | 0.02893691 |
| 240328    | F830016B08Rik | 3.8712615  | 0.02901742 |
| 100861913 | LOC100861913  | 2.00438427 | 0.02901742 |
| 69577     | Fastkd3       | -0.6189176 | 0.02901742 |
| 71779     | 8-Mar         | -0.6216166 | 0.02901742 |
| 11746     | Anxa4         | 0.52777719 | 0.02902218 |
| 329547    | Bpi           | 2.8867254  | 0.02903468 |
| 17708     | COX1          | -0.9006569 | 0.02903468 |
| 71778     | Klhl5         | -0.4892424 | 0.02903468 |
| 77644     | C330007P06Rik | -0.5677189 | 0.02903468 |
| 18457     | Bloc1s6       | -0.4309162 | 0.02903468 |
| 21780     | Tfam          | -0.6094732 | 0.02903604 |
| 67092     | Gatm          | -1.5316431 | 0.02904271 |
| 18191     | Nrxn3         | 1.84080633 | 0.02911478 |
| 224250    | Cldnd1        | -0.2970272 | 0.02911478 |
| 101214    | Tra2a         | -0.4454453 | 0.02913967 |
| 68178     | Cgnl1         | -0.5647826 | 0.02915832 |
| 83945     | Dnaja3        | -0.7388564 | 0.02915832 |
| 66162     | Bola2         | 0.73540504 | 0.02920892 |
| 230863    | Sh2d5         | 3.96543227 | 0.02922889 |
| 94224     | Srd5a2        | -1.3719219 | 0.02922889 |
| 67874     | Rprm          | 1.84519076 | 0.02922889 |
| 227327    | B3gnt7        | 1.52926111 | 0.02922889 |
| 26397     | Map2k3        | -0.3123607 | 0.02922889 |
| 237222    | Ofd1          | 0.55276714 | 0.0292549  |
| 384061    | Fndc5         | -0.6828313 | 0.02937834 |
| 233836    | Slc5a11       | -0.8164355 | 0.02937834 |
| 100502777 | Gm38422       | 1.27365104 | 0.02941994 |
| 18750     | Prkca         | -0.5717301 | 0.02941994 |
| 66917     | Chordc1       | -0.8940629 | 0.02941994 |
| 12442     | Ccnb2         | 1.97340439 | 0.02944521 |
| 16600     | Klf4          | 1.26562831 | 0.02944521 |
| 67048     | Vma21         | -0.4267083 | 0.02944521 |
| 68041     | Mid1ip1       | 0.76316446 | 0.02944521 |
| 17060     | Blnk          | 0.90755601 | 0.02944849 |
| 70918     | Nsun7         | 1.57420855 | 0.02945381 |
| 223332    | Ranbp3l       | -1.2879094 | 0.02945381 |

|           |               |            |            |
|-----------|---------------|------------|------------|
| 53381     | Prdx4         | -0.4906391 | 0.02945381 |
| 11950     | Atp5f1        | -0.7067944 | 0.02945381 |
| 66586     | Crls1         | -0.4355612 | 0.02945381 |
| 27364     | Srr           | -1.0027421 | 0.02945381 |
| 215015    | Fam20b        | -0.4933405 | 0.02945381 |
| 59049     | Slc22a17      | -0.5581309 | 0.02945381 |
| 67846     | Tmem39a       | -0.3605375 | 0.02952568 |
| 20277     | Scnn1b        | 0.72632136 | 0.02952568 |
| 20877     | Aurkb         | 1.87013363 | 0.02954754 |
| 641178    | Ighv5-9-1     | -2.7626956 | 0.02959359 |
| 320078    | Olfml2b       | -2.3086258 | 0.02975093 |
| 17384     | Mmp10         | 2.58018517 | 0.02982636 |
| 50765     | Tfr2          | 2.5637412  | 0.02982636 |
| 12449     | Ccnf          | 1.88146135 | 0.02982636 |
| 20511     | Slc1a2        | 1.36769029 | 0.02982636 |
| 19024     | Ppfbp2        | -0.4064313 | 0.02982636 |
| 15107     | Hadh          | -1.0677649 | 0.02986595 |
| 100502992 | Gm19491       | -1.1752501 | 0.02987386 |
| 24060     | Slc35a1       | -0.3138839 | 0.02987386 |
| 234404    | Nxn1          | -1.9445019 | 0.02989671 |
| 212712    | Satb2         | -0.6540431 | 0.02989671 |
| 791090    | Ighv2-6-8     | -5.1595005 | 0.02992966 |
| 353025    | Caps2         | 1.67985394 | 0.02998213 |
| 66371     | Chmp4c        | 0.70417692 | 0.02998213 |
| 215193    | Diexf         | -0.4113973 | 0.02998213 |
| 233065    | Alkbh6        | 0.63875039 | 0.02998213 |
| 69190     | Dym           | -0.8309222 | 0.02998213 |
| 83924     | Gpr137b       | -1.5952219 | 0.02998213 |
| 230775    | Adgrb2        | 1.7655454  | 0.03001689 |
| 16364     | Irf4          | 1.15098386 | 0.03001689 |
| 71909     | Haus5         | 0.55487359 | 0.03001689 |
| 231532    | Arhgap24      | -0.5278215 | 0.03001689 |
| 171211    | Edaradd       | 1.07758643 | 0.03003404 |
| 192662    | Arhgdia       | 0.31011274 | 0.03003404 |
| 98685     | Trmt1l        | -0.3518291 | 0.03003404 |
| 12862     | Cox6a2        | -1.4659511 | 0.03005888 |
| 225745    | Haus1         | 0.51658526 | 0.03007689 |
| 320487    | Heatr5a       | -0.4312272 | 0.03007689 |
| 97820     | 4833439L19Rik | -1.0668236 | 0.03007689 |



|        |               |            |            |
|--------|---------------|------------|------------|
| 226139 | Cox15         | -0.6892801 | 0.03007689 |
| 22619  | Siae          | -0.4182776 | 0.03018867 |
| 109689 | Arrb1         | -0.6295644 | 0.03027968 |
| 192191 | Med9          | 0.35136536 | 0.03037056 |
| 225362 | Reep2         | 1.68012481 | 0.03049063 |
| 240068 | Zfp563        | -0.551772  | 0.03049063 |
| 233011 | Itpkc         | 0.48448858 | 0.03049063 |
| 20666  | Sox11         | 2.83721894 | 0.03051201 |
| 70361  | Lman1         | -0.3531378 | 0.0306045  |
| 83675  | Bicc1         | 0.59084381 | 0.0306045  |
| 74319  | Mettl23       | 0.5173577  | 0.03067907 |
| 69549  | 2310009B15Rik | 0.74451613 | 0.03068486 |
| 13051  | Cx3cr1        | 1.6822865  | 0.03068486 |
| 217593 | Slc25a21      | -1.8656205 | 0.03068486 |
| 72068  | Cnot2         | -0.2262987 | 0.03068486 |
| 16873  | Lhx5          | 2.44020209 | 0.03070687 |
| 77106  | Tmem181a      | 0.63932994 | 0.03074819 |
| 244198 | Olfml1        | -1.4351927 | 0.03074819 |
| 66515  | Cul7          | 0.75583922 | 0.03074819 |
| 214804 | Syde2         | -0.7819569 | 0.03077168 |
| 381925 | Ppapdc1a      | 2.49316775 | 0.03077587 |
| 66505  | Zmynd11       | -0.2665189 | 0.03078454 |
| 74293  | 1700095J03Rik | 3.13361012 | 0.03084567 |
| 19347  | Dennd5a       | -0.346911  | 0.03087245 |
| 12652  | Chga          | 4.32694334 | 0.03092791 |
| 70310  | Plscr3        | 0.50385294 | 0.03092791 |
| 226591 | Tiprl         | -0.298093  | 0.03092791 |
| 67075  | Magt1         | -0.6242825 | 0.03092791 |
| 18569  | Pdcd4         | 0.55935378 | 0.03092791 |
| 19820  | Rlim          | 0.2751263  | 0.03092791 |
| 71147  | Oxsm          | -0.9635293 | 0.03093791 |
| 58804  | Cdc42ep5      | 1.18540795 | 0.03103078 |
| 13510  | Dsg1a         | 2.93584999 | 0.0310971  |
| 50873  | Park2         | -0.9369798 | 0.03111111 |
| 71941  | Cars2         | -0.478353  | 0.03113151 |
| 19886  | Ros1          | 3.26352262 | 0.03115162 |
| 259097 | Olf558        | -1.1316927 | 0.03115162 |
| 72354  | Ttc4          | -0.2570544 | 0.03115162 |
| 99152  | Anapc2        | 0.30968069 | 0.03124857 |

|           |               |            |            |
|-----------|---------------|------------|------------|
| 791370    | A130051J06Rik | 1.78080351 | 0.03138282 |
| 74194     | Rnd3          | 0.90822156 | 0.03138282 |
| 56451     | Suclg1        | -0.8472452 | 0.03140789 |
| 230259    | E130308A19Rik | 0.64454306 | 0.0314316  |
| 105348    | Golm1         | 2.16570077 | 0.0314316  |
| 217370    | BC017643      | 0.29377406 | 0.03148018 |
| 99138     | Stard7        | -0.7887334 | 0.03148018 |
| 66725     | Lrrk2         | -1.164703  | 0.03148018 |
| 72805     | Zfp839        | -0.3654791 | 0.03149632 |
| 28084     | Vps25         | 0.37359369 | 0.03150703 |
| 19729     | Slc50a1       | 0.58118216 | 0.03151087 |
| 227696    | Phyhd1        | -0.8936877 | 0.03151087 |
| 258022    | Olfr1318      | 2.90646513 | 0.03167051 |
| 68964     | Ctc1          | 0.43224467 | 0.03167051 |
| 11949     | Atp5c1        | -0.5185151 | 0.03173761 |
| 75572     | Acyp2         | -0.7872446 | 0.03175408 |
| 667728    | Hist1h2al     | -1.4012251 | 0.031762   |
| 268417    | Zkscan17      | 0.36432314 | 0.031762   |
| 20510     | Slc1a1        | -1.0826246 | 0.031762   |
| 269423    | 3110057O12Rik | -1.2639374 | 0.0319521  |
| 78908     | Igsf3         | 0.47093566 | 0.03197915 |
| 14302     | Frk           | 0.95349009 | 0.03197915 |
| 100034684 | BC100530      | 2.936933   | 0.03198931 |
| 230257    | Ptbp3         | 0.54668942 | 0.03198931 |
| 14824     | Grn           | 0.56213965 | 0.03199672 |
| 80904     | Dtx3          | -0.333772  | 0.03207267 |
| 246782    | Atpaf2        | -0.488451  | 0.03209716 |
| 75172     | Ccdc146       | -2.1080543 | 0.03212446 |
| 63953     | Dusp10        | 1.74877329 | 0.03215242 |
| 231646    | Myo1h         | 2.86013928 | 0.03218513 |
| 11461     | Actb          | 0.45932551 | 0.03219957 |
| 19934     | Rpl22         | 0.34604944 | 0.03225605 |
| 55948     | Sfn           | 2.89634077 | 0.03228246 |
| 11429     | Aco2          | -0.7129505 | 0.03231971 |
| 71890     | Mad2l2        | 0.95769304 | 0.03233264 |
| 70808     | 4632415L05Rik | -0.4507217 | 0.03233264 |
| 12345     | Capzb         | 0.32970774 | 0.03246034 |
| 668178    | Mettl7a3      | -1.2246508 | 0.03246034 |
| 238021    | Fscn2         | 2.48656069 | 0.03249596 |

|           |               |            |            |
|-----------|---------------|------------|------------|
| 77090     | Ocel1         | -1.4466338 | 0.03253813 |
| 67937     | Tmem59l       | 1.83898628 | 0.0325566  |
| 208501    | 1810043H04Rik | -0.4177051 | 0.0325566  |
| 545647    | Gm13289       | 2.79885487 | 0.03260947 |
| 544990    | Gm5795        | 1.96347632 | 0.03260947 |
| 67604     | Get4          | 0.68182311 | 0.03260947 |
| 666678    | Gm8232        | 3.13189269 | 0.03265689 |
| 72668     | Skida1        | -0.6773011 | 0.0326626  |
| 54383     | Phc2          | 0.37771383 | 0.03269927 |
| 66569     | Gdpd1         | 1.12885314 | 0.03275049 |
| 105243    | Slc9a3        | -1.3422453 | 0.03275049 |
| 66046     | Ndufb5        | -0.5871947 | 0.03275049 |
| 12794     | Cnih2         | 1.28799448 | 0.03276727 |
| 224171    | C330027C09Rik | 1.36267511 | 0.03276727 |
| 75516     | Ttc32         | -0.4239771 | 0.03276727 |
| 207151    | Slc22a19      | -2.2570514 | 0.03276727 |
| 106861    | Abhd3         | -1.5046793 | 0.03276727 |
| 17184     | Matr3         | 0.29253032 | 0.03276727 |
| 57317     | Srsf4         | -0.3339641 | 0.03276727 |
| 242570    | Raver2        | -1.3454943 | 0.03281596 |
| 100041724 | Gm15217       | -1.5751104 | 0.03282772 |
| 218973    | Wdhd1         | 1.37990103 | 0.03288274 |
| 75668     | Rasl10a       | 1.78256169 | 0.03300065 |
| 226751    | Cdc42bpa      | -0.4152976 | 0.0330449  |
| 12234     | Btrc          | -0.2431036 | 0.03314884 |
| 71988     | Esco2         | 2.16778887 | 0.03328943 |
| 22151     | Tubb2a        | 1.13084414 | 0.03331268 |
| 102680    | Slc6a20a      | -1.1422476 | 0.03331872 |
| 280662    | Afm           | -1.3434447 | 0.03335184 |
| 15975     | lfnar1        | 0.4169593  | 0.03335184 |
| 100306954 | Snora17       | 1.11591738 | 0.03348946 |
| 74053     | Grip1         | 0.98498188 | 0.03353131 |
| 218214    | Kdm1b         | -0.7515689 | 0.03353131 |
| 319965    | Cc2d1b        | 0.42218816 | 0.03353131 |
| 666532    | Gm13139       | 0.96780996 | 0.03353143 |
| 26372     | Clcn6         | -0.9182143 | 0.03368252 |
| 12684     | Cideb         | -1.2697961 | 0.03368252 |
| 54418     | Fmn2          | -2.1254578 | 0.03369065 |
| 14963     | H2-BI         | -3.2897793 | 0.03375681 |

|           |               |            |            |
|-----------|---------------|------------|------------|
| 56506     | Cib2          | 0.49655161 | 0.03379325 |
| 18811     | Prl2c2        | 2.46699796 | 0.03380005 |
| 209737    | Kif15         | 1.25103902 | 0.03380005 |
| 107829    | Thoc5         | 0.38601378 | 0.03380005 |
| 433632    | Gm5544        | 2.20972181 | 0.03380527 |
| 11438     | Chrna4        | -0.9409882 | 0.03380697 |
| 319711    | E230029C05Rik | 1.99905897 | 0.03381858 |
| 381318    | Nsl1          | 1.89925654 | 0.03381858 |
| 27207     | Rps11         | 0.52943046 | 0.03382469 |
| 63913     | Fam129a       | 1.42879681 | 0.03388586 |
| 67732     | lah1          | -0.7651748 | 0.03392768 |
| 100038569 | Gm10558       | 2.75305315 | 0.03424408 |
| 224624    | Rab40c        | 0.44401517 | 0.03424408 |
| 100504632 | Gm11478       | 1.13819381 | 0.03435188 |
| 23972     | Papss2        | -1.263307  | 0.03435188 |
| 67621     | Bend5         | -1.0324992 | 0.03435188 |
| 76478     | Haus8         | 1.13145373 | 0.03448252 |
| 13518     | Dst           | -0.4899397 | 0.03449238 |
| 319263    | Pcmt1         | -0.3556851 | 0.03449238 |
| 208836    | Fanci         | 0.63954719 | 0.03450422 |
| 104112    | Acly          | -0.6917348 | 0.03450422 |
| 208628    | Kntc1         | 1.66905459 | 0.03457985 |
| 219114    | Ska3          | 1.011449   | 0.03462548 |
| 76917     | Flywch2       | 1.36055293 | 0.03462548 |
| 100526469 | Mir3064       | -0.7786148 | 0.03462548 |
| 207911    | Mchr1         | 1.77595759 | 0.03466482 |
| 20502     | Slc16a2       | -1.4835686 | 0.03467253 |
| 319178    | Hist1h2bb     | -2.4837361 | 0.03467738 |
| 11688     | Alox8         | 1.93826108 | 0.03472678 |
| 27214     | Dbf4          | 0.73185949 | 0.03472678 |
| 66714     | 4921524J17Rik | -0.4109114 | 0.03472678 |
| 100043813 | Rps27rt       | 0.45807449 | 0.03482116 |
| 23853     | Def6          | 0.97300767 | 0.03484036 |
| 72658     | 2700097O09Rik | -0.5853933 | 0.03485552 |
| 381346    | Gm13194       | -1.4148035 | 0.03489884 |
| 52609     | Cbx7          | 0.71446029 | 0.03489884 |
| 109284    | R3hdm4        | 0.32063506 | 0.03491033 |
| 16551     | Kif11         | 1.1793053  | 0.0349221  |
| 52014     | Nus1          | -0.8364552 | 0.0349221  |

|           |               |            |            |
|-----------|---------------|------------|------------|
| 56077     | Dgke          | 0.72964873 | 0.03508145 |
| 232878    | Zscan22       | -0.521899  | 0.03510142 |
| 105732    | Fam83h        | 0.28289709 | 0.03510142 |
| 109082    | Fbxw17        | 0.89519466 | 0.03510665 |
| 381280    | Hjrp          | 1.28515912 | 0.0351108  |
| 56089     | Ramp3         | -0.9515611 | 0.0351108  |
| 67471     | Gpatch1       | 0.51373153 | 0.0351108  |
| 17765     | Mtf2          | 0.35036382 | 0.0351108  |
| 59056     | Evc           | -1.0795867 | 0.0351108  |
| 103711    | Pnpo          | -0.8402788 | 0.0351108  |
| 67453     | Slc25a46      | -0.5333198 | 0.0351108  |
| 19752     | Rnase1        | -2.3251257 | 0.03511099 |
| 58186     | Rad18         | 1.29650554 | 0.03514841 |
| 100503499 | Gm16136       | 1.07946445 | 0.03514841 |
| 100503447 | Gm19696       | -1.4261168 | 0.03514841 |
| 64697     | Keg1          | -1.2781305 | 0.03514841 |
| 66995     | Zcchc18       | 1.0214156  | 0.03516946 |
| 71583     | 9130008F23Rik | 0.97998522 | 0.03516946 |
| 67425     | Eps81         | 1.39631357 | 0.03516946 |
| 107305    | Vps37c        | 0.32134937 | 0.03516946 |
| 27276     | Plekhb1       | -1.3092262 | 0.0352571  |
| 332937    | Tfap2e        | 3.05762928 | 0.03527288 |
| 16426     | Itih3         | 1.31162526 | 0.03527288 |
| 71746     | Rgl3          | 0.37208089 | 0.03527288 |
| 353502    | Hcfc1r1       | 0.37422483 | 0.03530994 |
| 20716     | Serpina3n     | 1.59064491 | 0.03533196 |
| 20473     | Six3          | 2.95620185 | 0.03537963 |
| 12649     | Chek1         | 1.15303306 | 0.03537963 |
| 78751     | Zc3h6         | 0.76548205 | 0.03537963 |
| 66901     | Proz          | -2.2844821 | 0.03542146 |
| 18984     | Por           | -0.6760364 | 0.03543629 |
| 67758     | Aadac         | -0.9824117 | 0.03543629 |
| 100038479 | Gm10787       | -1.3251005 | 0.03549514 |
| 110596    | Arhgef28      | 0.45222656 | 0.03555249 |
| 319604    | Fam168a       | -0.3576892 | 0.03555282 |
| 21784     | Tff1          | -1.3532185 | 0.03561027 |
| 68778     | Gucd1         | -0.6296677 | 0.03561027 |
| 12121     | Bicd1         | 0.54552021 | 0.03570926 |
| 19946     | Rpl30         | 1.14224528 | 0.03574358 |

|           |               |            |            |
|-----------|---------------|------------|------------|
| 76843     | Dtl           | 1.77906134 | 0.03579441 |
| 21857     | Timp1         | 2.42160948 | 0.03579441 |
| 66566     | Ntpcr         | 0.43372557 | 0.03579441 |
| 99011     | Pomt1         | -0.8142907 | 0.03579441 |
| 271047    | Serpina3b     | 4.54030474 | 0.03579941 |
| 219072    | Haus4         | 0.4709626  | 0.03579941 |
| 67201     | Glod4         | -0.5205421 | 0.03579941 |
| 12484     | Cd24a         | 1.43958623 | 0.03581825 |
| 319216    | 4932441J04Rik | 2.8671825  | 0.03596882 |
| 56703     | Pigo          | -0.4541447 | 0.03599574 |
| 14613     | Gja5          | -2.5344558 | 0.03603078 |
| 18822     | Plod1         | -0.4771361 | 0.03604934 |
| 100038391 | Gm10287       | -3.2386234 | 0.03605141 |
| 230718    | Nt5c1a        | 2.17622549 | 0.03605381 |
| 18011     | Neur1a        | 1.18433197 | 0.03605381 |
| 12380     | Cast          | 0.67911954 | 0.03608163 |
| 16855     | Lgals4        | 1.66928239 | 0.03611461 |
| 210106    | Papd7         | -0.7424671 | 0.03612927 |
| 69574     | Cmb1          | -1.200131  | 0.03612927 |
| 74123     | Foxp4         | 0.45034316 | 0.03612927 |
| 22401     | Zmat3         | 0.59716116 | 0.03612927 |
| 230674    | Kdm4a         | 0.32118401 | 0.03612927 |
| 236794    | Slc9a6        | -0.5794616 | 0.03618821 |
| 100039307 | Gm2149        | -2.5742334 | 0.03620358 |
| 320872    | Arhgap15os    | 2.87522915 | 0.03630499 |
| 13874     | Ereg          | 3.26914445 | 0.03630499 |
| 232821    | Ccdc106       | 0.95562916 | 0.03630499 |
| 100504089 | Gm20056       | -0.5830231 | 0.03630499 |
| 380674    | Rdh18-ps      | -1.9333894 | 0.03630499 |
| 21815     | Tgif1         | 0.72829789 | 0.03630499 |
| 68364     | 0610030E20Rik | -0.3798136 | 0.03630499 |
| 18408     | Slc25a15      | -1.022578  | 0.03630499 |
| 18105     | Nqo2          | -0.47554   | 0.03630499 |
| 66420     | Polr2e        | 0.38436744 | 0.03630499 |
| 19385     | Ranbp1        | 0.51557853 | 0.03630499 |
| 114570    | Crip3         | -1.4409939 | 0.03631839 |
| 99870     | AW047730      | 2.74288799 | 0.03633612 |
| 26370     | Cetn2         | -0.2983779 | 0.03633612 |
| 22278     | Usf1          | 0.29459289 | 0.03647636 |

|           |               |            |            |
|-----------|---------------|------------|------------|
| 230648    | Efcab14       | -0.3505303 | 0.03653276 |
| 21789     | Tfpi2         | -1.5357754 | 0.03671528 |
| 20517     | Slc22a1       | -0.8673413 | 0.03671528 |
| 11782     | Ap4s1         | 0.31163321 | 0.03678603 |
| 21847     | Klf10         | 0.91936252 | 0.03680537 |
| 269261    | Rpl12         | 0.76616791 | 0.03682941 |
| 236798    | Adgrg4        | -2.6880168 | 0.03698044 |
| 89867     | Sec16b        | 1.13735482 | 0.03698058 |
| 625599    | Gml           | 2.77964454 | 0.03699736 |
| 14990     | H2-M2         | 1.3287815  | 0.03699736 |
| 668661    | 2410002F23Rik | 0.54038283 | 0.03708465 |
| 68606     | Ppm1f         | -0.3342303 | 0.03715945 |
| 69674     | Mif4gd        | -0.3926271 | 0.03715945 |
| 268420    | Alkbh5        | -0.461584  | 0.03722268 |
| 66805     | Tspan1        | -0.7197642 | 0.03722268 |
| 242297    | Fam110b       | 0.9525521  | 0.03726573 |
| 68291     | Mto1          | -0.8365418 | 0.03732518 |
| 494448    | Cbx6          | 0.48459341 | 0.03732518 |
| 67115     | Rpl14         | 0.36550758 | 0.03734058 |
| 223453    | Dap           | -0.433464  | 0.03734386 |
| 22710     | Zfp52         | 1.03818753 | 0.03741197 |
| 11792     | Apex1         | 0.7686295  | 0.03741295 |
| 16866     | Lhb           | 3.52582761 | 0.03741793 |
| 68992     | Zfp580        | 0.88282305 | 0.03741793 |
| 100041680 | Gm3470        | -0.8854639 | 0.03741793 |
| 26384     | Gnpda1        | -0.9149114 | 0.03741793 |
| 66948     | Acad8         | -0.6734081 | 0.03741793 |
| 64050     | Yeats4        | 0.26765352 | 0.03741882 |
| 236193    | Zfp709        | -0.5375503 | 0.03747029 |
| 18968     | Pola1         | 0.54288614 | 0.03747522 |
| 100526511 | Mir3108       | 1.72000014 | 0.03754117 |
| 215772    | Adgb          | 2.83684135 | 0.03754117 |
| 18534     | Pck1          | -1.2129503 | 0.03754117 |
| 57394     | Tmem27        | -1.1794669 | 0.03754117 |
| 226525    | Rasal2        | -0.3322651 | 0.03754117 |
| 223337    | Ugt3a2        | -2.0925231 | 0.03754117 |
| 13640     | Efna5         | 0.95778776 | 0.03756196 |
| 100216530 | Snord118      | 2.55951462 | 0.03756707 |
| 234362    | Zfp868        | -1.0158533 | 0.03756707 |

|           |               |            |            |
|-----------|---------------|------------|------------|
| 21812     | Tgibr1        | 0.37177606 | 0.03756707 |
| 22059     | Trp53         | 0.46403763 | 0.03760619 |
| 100342    | Fam46b        | 1.24672388 | 0.037646   |
| 629159    | 1700008J07Rik | -0.6756783 | 0.0376641  |
| 170728    | Rtn4ip1       | -0.9411954 | 0.0376641  |
| 22259     | Nr1h3         | -0.8694509 | 0.03766911 |
| 224705    | Vps52         | -0.4252318 | 0.03773192 |
| 22165     | Txk           | 1.64442967 | 0.03775179 |
| 23801     | Aloxe3        | 3.22153748 | 0.03776926 |
| 19212     | Pter          | -0.7743373 | 0.03776926 |
| 15939     | Ier5          | 0.87794075 | 0.03776926 |
| 59057     | Zfp191        | -0.4903419 | 0.03776926 |
| 57764     | Ntn4          | 0.5218023  | 0.03776926 |
| 75789     | 4930444M15Rik | 1.71908083 | 0.03783014 |
| 329716    | BC107364      | 4.39711124 | 0.03783344 |
| 170460    | Stard5        | -0.5080613 | 0.03783344 |
| 71732     | Vps11         | 0.3273358  | 0.0379301  |
| 100503730 | Gm19860       | -1.4551681 | 0.03796693 |
| 69665     | Upk3bl        | 4.1209659  | 0.03799212 |
| 545864    | Gm5879        | 1.01408484 | 0.03799212 |
| 98682     | Mfsd6         | 0.31443783 | 0.03799212 |
| 73694     | Ndufaf7       | -0.3820189 | 0.03799212 |
| 26926     | Aifm1         | -0.6966201 | 0.03799212 |
| 71807     | Tars2         | -0.3758193 | 0.03799212 |
| 100042424 | Gm3837        | 0.49626297 | 0.03799212 |
| 105887    | Ugt3a1        | -2.493402  | 0.03800859 |
| 16571     | Kif4          | 1.55876024 | 0.03805191 |
| 225875    | Lrfr4         | 0.84586971 | 0.03805191 |
| 170625    | Snx18         | -0.5569666 | 0.03819635 |
| 22142     | Tuba1a        | 1.05038342 | 0.03828589 |
| 21763     | Tex2          | -0.8310826 | 0.03828589 |
| 100862257 | NA            | 0.60769086 | 0.03828689 |
| 19743     | Rhag          | 2.78037102 | 0.0384125  |
| 12821     | Col17a1       | 2.27070065 | 0.03842775 |
| 15487     | Hsd17b3       | -3.1620291 | 0.03849517 |
| 100504489 | Gm16867       | 1.77586759 | 0.03849517 |
| 72012     | 1600020E01Rik | -0.5951431 | 0.03849517 |
| 27886     | Dgcr14        | 0.37489237 | 0.03849517 |
| 18643     | Pfn1          | 0.52523844 | 0.03849517 |



|           |               |            |            |
|-----------|---------------|------------|------------|
| 70387     | Ttc9c         | -0.3040464 | 0.03849517 |
| 69161     | Manbal        | 0.67044169 | 0.03849517 |
| 74580     | Pyroxd2       | -0.8950798 | 0.03849517 |
| 59040     | Rhot1         | -0.5116653 | 0.03849517 |
| 52874     | D19Bwg1357e   | 0.25731206 | 0.03850938 |
| 216976    | BC030499      | -1.8232684 | 0.03851933 |
| 18476     | Pafah1b3      | 1.03299381 | 0.03851933 |
| 194219    | Sifnl1        | 2.15177308 | 0.03854797 |
| 12418     | Cbx4          | -0.4649893 | 0.03855542 |
| 76080     | Ttpal         | 0.38098854 | 0.03856179 |
| 28254     | Slco1a6       | -1.66997   | 0.0385779  |
| 20103     | Rps5          | 0.53325428 | 0.0385779  |
| 110948    | Hlcs          | 0.64834621 | 0.03868921 |
| 18400     | Slc22a18      | -1.275242  | 0.03868921 |
| 211329    | Ncoa7         | -0.7186992 | 0.03875754 |
| 108672    | Zdhhc15       | 1.37069821 | 0.03875974 |
| 78194     | 4930546K05Rik | 3.73545322 | 0.03883444 |
| 104156    | Etv5          | -0.8608865 | 0.03887646 |
| 68944     | Tmco1         | -0.563331  | 0.03897775 |
| 21927     | Tnfaip1       | 0.33033457 | 0.03902807 |
| 13861     | Epx           | 3.75824515 | 0.03903984 |
| 234199    | Fgl1          | 4.05747805 | 0.03903984 |
| 67071     | Rps6ka6       | 0.94675083 | 0.03903984 |
| 27354     | Nbn           | -0.47029   | 0.03903984 |
| 106014    | Fam19a5       | 0.60474388 | 0.03905989 |
| 72180     | Zfp661        | -0.5163546 | 0.03908389 |
| 381605    | Tbc1d2        | 0.93290034 | 0.03908389 |
| 14600     | Ghr           | -1.1600533 | 0.03908389 |
| 20742     | Sptbn1        | -0.3401433 | 0.03908389 |
| 55990     | Fmo2          | -1.3690831 | 0.03908389 |
| 192201    | Wfdc15b       | -1.2197701 | 0.03908389 |
| 56226     | Espn          | -0.5436597 | 0.03908389 |
| 100503078 | Gm19541       | -1.9634388 | 0.03916374 |
| 791303    | Gm10277       | 0.61218205 | 0.0392037  |
| 666259    | Gm15573       | -2.325144  | 0.03921875 |
| 11826     | Aqp1          | -1.03283   | 0.03923848 |
| 52705     | Krr1          | -0.2955516 | 0.03923848 |
| 215798    | Adgrg6        | 1.84027    | 0.03928347 |
| 97114     | Hist2h3c2     | -1.5014839 | 0.03928347 |

|        |               |            |            |
|--------|---------------|------------|------------|
| 231832 | Tmem184a      | -0.3637101 | 0.03928347 |
| 18597  | Pdha1         | -0.6853437 | 0.03928347 |
| 14865  | Gstm4         | -0.5242757 | 0.0393685  |
| 216543 | Cep68         | -0.312536  | 0.0393685  |
| 17288  | Mep1b         | -1.6859518 | 0.0393685  |
| 225339 | Ammecr1l      | -0.4251786 | 0.0393685  |
| 67382  | Brd3          | 0.32612886 | 0.03938994 |
| 320111 | Prr18         | -2.3900698 | 0.03939494 |
| 74435  | Lrriq3        | -1.0272159 | 0.03942309 |
| 74732  | Stx11         | 1.68841267 | 0.03946976 |
| 71710  | Lrrcc1        | 0.42602412 | 0.03950998 |
| 52857  | Gramd1a       | 0.47444536 | 0.03950998 |
| 14784  | Grb2          | 0.24202976 | 0.03950998 |
| 68400  | 0610043K17Rik | -0.8350528 | 0.03951332 |
| 320950 | 9330104G04Rik | 1.55458054 | 0.03951695 |
| 16939  | Lor           | 2.00747537 | 0.03954282 |
| 17769  | Mthfr         | -0.6795311 | 0.03954282 |
| 18016  | Nf2           | -0.2745002 | 0.03954282 |
| 78653  | Bola3         | -0.6308095 | 0.03954282 |
| 75906  | Fam184a       | -0.6389139 | 0.03958633 |
| 17387  | Mmp14         | 1.90519854 | 0.03967926 |
| 11933  | Atp1b3        | -0.311962  | 0.03967926 |
| 15259  | Hipk3         | -0.3641711 | 0.03970513 |
| 80286  | Tusc3         | -0.3584316 | 0.03988623 |
| 21834  | Thrb          | -0.5531307 | 0.03992197 |
| 52276  | Cdca8         | 1.16828849 | 0.03999466 |
| 66929  | Asf1b         | 1.09812376 | 0.04003135 |
| 319504 | Nrcam         | 2.03381943 | 0.04019217 |
| 71169  | Nbas          | -0.4515133 | 0.04030315 |
| 12615  | Cenpa         | 1.17316179 | 0.04037641 |
| 17242  | Mdk           | -1.4411311 | 0.04042802 |
| 11459  | Acta1         | 1.45025495 | 0.04047553 |
| 73804  | Kif2c         | 1.2734441  | 0.04047553 |
| 237436 | Gas2l3        | 1.10901271 | 0.04047553 |
| 27274  | Zfp354b       | -0.8087976 | 0.04047553 |
| 69790  | Med30         | 0.48240294 | 0.04047553 |
| 66451  | 2610528J11Rik | -0.9424844 | 0.04047553 |
| 65111  | Dap3          | -0.4325828 | 0.04047553 |
| 17909  | Myo10         | 0.42545506 | 0.0404855  |

|           |               |            |            |
|-----------|---------------|------------|------------|
| 68533     | Mphosph6      | 0.5234634  | 0.04049236 |
| 76425     | Gid8          | -0.2505294 | 0.04049236 |
| 53624     | Cldn7         | 1.33110887 | 0.0405024  |
| 232539    | Klhl42        | 0.52729554 | 0.04050616 |
| 100503855 | Gm19929       | 3.20723025 | 0.04052243 |
| 103551    | E130012A19Rik | 1.91121723 | 0.04052243 |
| 109264    | Me3           | -0.7375157 | 0.04052243 |
| 77411     | Esrp2         | -0.6037103 | 0.04052695 |
| 75965     | Zdhhc20       | 0.58172883 | 0.04067976 |
| 74480     | Samd4         | 1.55275489 | 0.04071117 |
| 12176     | Bnip3         | -0.4402612 | 0.04071117 |
| 67238     | Fam220a       | -0.4130302 | 0.0408281  |
| 71973     | Rbpms2        | -0.8262794 | 0.04090239 |
| 69350     | 1700003G18Rik | -3.258311  | 0.04092462 |
| 217738    | Ism2          | 3.07687717 | 0.04092462 |
| 71566     | Clmp          | -0.5717658 | 0.04092462 |
| 76560     | Prss8         | -0.5753152 | 0.04092462 |
| 212139    | Cc2d1a        | 0.33385906 | 0.04099116 |
| 18631     | Pex11a        | -0.9529551 | 0.04101649 |
| 73167     | Arhgap8       | 0.62834618 | 0.04101649 |
| 53599     | Cd164         | -0.4892315 | 0.04101649 |
| 207182    | Ggt7          | 1.04779819 | 0.04103039 |
| 21408     | Zfp354a       | -0.5432515 | 0.04103039 |
| 12655     | Chil3         | 2.79176478 | 0.04114263 |
| 72045     | 2010001E11Rik | -1.2383543 | 0.04115291 |
| 229841    | Cenpe         | 1.31503753 | 0.04120989 |
| 232089    | Elmod3        | -0.373974  | 0.0412105  |
| 12702     | Socs3         | 1.83770947 | 0.04122951 |
| 21391     | Tbxas1        | -1.0257715 | 0.04122951 |
| 73442     | Hspa12a       | -0.6862166 | 0.04122951 |
| 11699     | Ambp          | 1.69314753 | 0.04125817 |
| 22592     | Ercc5         | 0.57101716 | 0.04126758 |
| 93697     | Ice2          | -0.3760173 | 0.04128225 |
| 226539    | Dars2         | -0.702935  | 0.04128225 |
| 13716     | Eil           | 0.48247322 | 0.04128225 |
| 237542    | Osbpl8        | -1.1530686 | 0.04128225 |
| 76132     | Faxc          | 1.30309881 | 0.04130558 |
| 211770    | Trib1         | 0.73037174 | 0.04130558 |
| 26365     | Ceacam1       | -0.745474  | 0.04136481 |

|           |               |            |            |
|-----------|---------------|------------|------------|
| 66445     | Cyc1          | -0.5000161 | 0.04137581 |
| 76866     | Morn1         | 0.51600734 | 0.0413912  |
| 17777     | Mttp          | -0.789135  | 0.04152884 |
| 100861936 | NA            | -1.9796501 | 0.04162333 |
| 545085    | Wdr70         | 0.37211527 | 0.0417439  |
| 54373     | Prss16        | 3.17187178 | 0.04178359 |
| 109229    | Fam118b       | 0.52614278 | 0.04178359 |
| 67711     | Nsmce1        | 0.37699509 | 0.04190666 |
| 50772     | Mapk6         | 0.59474074 | 0.04194319 |
| 20403     | Itsn2         | 0.34674434 | 0.04194319 |
| 100417831 | Gm18853       | 2.66353965 | 0.04196785 |
| 13047     | Cux1          | -0.802098  | 0.04216286 |
| 76491     | Abhd14b       | -0.9905911 | 0.04219743 |
| 52372     | D6Ert527e     | 2.8741103  | 0.04224221 |
| 14570     | Arhgdig       | 0.89374962 | 0.04224221 |
| 66859     | Slc16a9       | -1.2952581 | 0.04227769 |
| 76808     | Rpl18a        | 0.54985917 | 0.04233394 |
| 100043125 | Gm11711       | -2.5472397 | 0.04248141 |
| 67891     | Rpl4          | 0.2535459  | 0.04250591 |
| 100503868 | Gm19935       | 2.78302629 | 0.04260753 |
| 20530     | Slc31a2       | 0.48157908 | 0.04266467 |
| 100504267 | Trp53cor1     | 2.39442472 | 0.04270176 |
| 245666    | Iqsec2        | -0.86917   | 0.04270672 |
| 100502946 | Gm16796       | 1.63134697 | 0.04280394 |
| 12164     | Bmp8b         | 2.91872994 | 0.04284312 |
| 107702    | Rnh1          | 0.47644413 | 0.04284312 |
| 67636     | Lym5          | -0.7774708 | 0.04284312 |
| 66881     | Pcyox1        | 0.38575262 | 0.04284312 |
| 216395    | Tmem5         | 0.24040968 | 0.04285524 |
| 378462    | Morn2         | -0.6382904 | 0.04285733 |
| 28199     | Dcaf11        | -0.3693341 | 0.04286157 |
| 23936     | Lynx1         | 1.67788062 | 0.04289421 |
| 434341    | Nlrc5         | 1.37507034 | 0.04289996 |
| 18293     | Ogdh          | -0.6016664 | 0.04298255 |
| 14211     | Smc2          | 0.63447762 | 0.04300835 |
| 22249     | Unc13b        | 0.96677366 | 0.04303796 |
| 319556    | A330041J22Rik | -2.0235796 | 0.04308708 |
| 15216     | Hfe           | 1.09354556 | 0.04317697 |
| 434609    | Ighv1-84      | -3.6315183 | 0.04325084 |

|           |               |            |            |
|-----------|---------------|------------|------------|
| 27204     | Syn3          | -2.0506025 | 0.04325084 |
| 109711    | Actn1         | 1.35097743 | 0.04328051 |
| 67669     | I7Rn6         | -0.4825423 | 0.04328179 |
| 224648    | Uhrf1bp1      | -0.3556635 | 0.04348319 |
| 74211     | 1700017B05Rik | 0.46021331 | 0.0435543  |
| 105722    | Ano6          | 0.34262398 | 0.04359445 |
| 100169    | Phactr4       | -0.4789774 | 0.04382406 |
| 12896     | Cpt2          | -0.903764  | 0.04384779 |
| 268697    | Ccnb1         | 1.6605277  | 0.04385551 |
| 76965     | Slitrk1       | 2.97101509 | 0.04388657 |
| 18787     | Serpine1      | 1.61810383 | 0.04389053 |
| 100504710 | Gm11128       | -2.316421  | 0.04389053 |
| 723962    | Mir26a-2      | 2.5593762  | 0.04405708 |
| 381339    | Tmem182       | -3.5206252 | 0.04408572 |
| 14056     | Ezh2          | 0.53984598 | 0.04408572 |
| 72102     | Dusp11        | -0.3301989 | 0.04410627 |
| 76608     | Hectd3        | -0.4743941 | 0.04413522 |
| 52285     | D6Ert474e     | 2.96301612 | 0.04420376 |
| 12316     | Aspm          | 1.60894999 | 0.04420376 |
| 100042740 | Rpl31-ps9     | 0.68862029 | 0.04420376 |
| 51875     | Tmem141       | 0.2666056  | 0.04420376 |
| 21807     | Tsc22d1       | 0.74636372 | 0.04420376 |
| 319651    | Usp37         | -0.4263445 | 0.04420376 |
| 11370     | Acadvl        | -2.3861474 | 0.04420376 |
| 21894     | Tln1          | -0.3749277 | 0.04420376 |
| 13589     | Mapre1        | 0.21790524 | 0.04420376 |
| 209378    | Itih5         | -0.9833755 | 0.04428332 |
| 17537     | Meis3         | 1.50856632 | 0.04436244 |
| 73130     | Tmed5         | 0.73755511 | 0.04436244 |
| 15218     | Foxn1         | 3.49372448 | 0.04441506 |
| 100043147 | Gm4262        | 3.5606399  | 0.04444887 |
| 100126224 | Gm11747       | 3.36235177 | 0.04444887 |
| 171283    | Havcr1        | 2.90059535 | 0.04446782 |
| 69956     | Ptcd3         | -0.5446918 | 0.04447408 |
| 241041    | Gm4956        | -1.8031968 | 0.04456889 |
| 69660     | Tmbim1        | 0.52836273 | 0.04464254 |
| 432502    | Gm5428        | 0.4192748  | 0.04464254 |
| 110417    | Pigh          | -0.5749427 | 0.04469057 |
| 19714     | Rev3l         | 0.47114608 | 0.04476416 |

|           |               |            |            |
|-----------|---------------|------------|------------|
| 100504223 | Gm20120       | -2.9521098 | 0.04481408 |
| 23830     | Capn10        | -0.4043589 | 0.04481408 |
| 20390     | Sftpd         | 3.36467996 | 0.04485168 |
| 22421     | Wnt7a         | 3.60692853 | 0.04485168 |
| 74134     | Cyp2s1        | 1.21530722 | 0.04485168 |
| 71970     | Zbed5         | -0.5461073 | 0.04485168 |
| 20500     | Slc13a2       | -0.7041041 | 0.04485168 |
| 234413    | Zfp961        | -0.4925283 | 0.04485193 |
| 70650     | Zcchc8        | -0.2631077 | 0.04490263 |
| 22063     | Trpc1         | -0.9964938 | 0.04524672 |
| 243382    | Ppm1k         | -0.7358561 | 0.04530053 |
| 12985     | Csf3          | 3.2263041  | 0.04533891 |
| 52389     | Adgra1        | 4.00382783 | 0.04533891 |
| 72306     | Zfp777        | 0.29841164 | 0.04533891 |
| 16008     | Igfbp2        | 1.98137878 | 0.04539563 |
| 14085     | Fah           | -1.0402205 | 0.04539563 |
| 69227     | Selt          | -0.6432346 | 0.04539563 |
| 14938     | Gzma          | -3.0546561 | 0.04540836 |
| 233147    | Zfp939        | -0.7794472 | 0.04543419 |
| 26912     | Gcat          | -0.8464671 | 0.04543419 |
| 102657    | Cd276         | 2.13046122 | 0.04555437 |
| 77619     | Preli2        | 1.49989546 | 0.04563695 |
| 613258    | A730017L22Rik | -0.6383124 | 0.04573368 |
| 791408    | Gm16496       | 1.99372541 | 0.04576177 |
| 106585    | Ankrd12       | 0.56501258 | 0.04576177 |
| 20586     | Smarca4       | 0.31827329 | 0.04580405 |
| 238271    | Kcnh5         | 2.59220679 | 0.04580863 |
| 68195     | Rnaset2b      | 0.52744119 | 0.04580863 |
| 20425     | Shmt1         | -0.9366685 | 0.04580863 |
| 105246    | Brd9          | 0.39030115 | 0.04581334 |
| 70441     | 2610100L16Rik | -2.1927339 | 0.04590262 |
| 15043     | H2-T3         | -3.5114022 | 0.04611651 |
| 72549     | Reep4         | 0.44766    | 0.04611651 |
| 12257     | Tspo          | 0.48176011 | 0.04617038 |
| 50496     | E2f6          | -0.5491899 | 0.04618032 |
| 15485     | Hsd17b1       | -1.2797177 | 0.04621183 |
| 30956     | Aass          | -1.411606  | 0.04621183 |
| 64294     | Iitm2c        | 0.60062754 | 0.04622045 |
| 66775     | Hacd4         | 1.34733396 | 0.04626429 |

|           |               |            |            |
|-----------|---------------|------------|------------|
| 69367     | Glr2          | -0.6208728 | 0.04626429 |
| 13819     | Epas1         | -1.2685111 | 0.04639939 |
| 231912    | Katnal1       | -0.6522133 | 0.04653219 |
| 211446    | Exoc3         | -0.236061  | 0.04653915 |
| 15247     | Hiat1         | -0.4067536 | 0.04655321 |
| 242819    | Rundc3b       | -1.087816  | 0.04664125 |
| 100504536 | Gm20273       | -0.7968726 | 0.04664125 |
| 54448     | Il1f6         | 2.60704199 | 0.04664125 |
| 665596    | Hist1h2bq     | -1.7769076 | 0.04664125 |
| 229715    | Amigo1        | -0.5788152 | 0.04664125 |
| 11428     | Aco1          | -0.7622984 | 0.04664125 |
| 68953     | Chmp2a        | 0.34371764 | 0.04664125 |
| 20130     | Rras          | 1.13687176 | 0.04664125 |
| 66085     | Eif3f         | 0.34965582 | 0.04667854 |
| 58251     | BC100451      | 3.05911916 | 0.04680694 |
| 17716     | ND1           | -0.8498202 | 0.04680694 |
| 216987    | Utp6          | -0.2793835 | 0.04690982 |
| 11421     | Ace           | -1.5886145 | 0.04702554 |
| 217732    | Cipc          | -0.3671686 | 0.04703474 |
| 68839     | Ankrd46       | -0.2874125 | 0.04703474 |
| 215951    | Lace1         | -0.6854454 | 0.04705181 |
| 68977     | Haghl         | 0.44103973 | 0.04724572 |
| 229706    | Slc6a17       | 2.00678215 | 0.04744128 |
| 20698     | Sphk1         | 1.63066491 | 0.04744128 |
| 70470     | Rprd1b        | -0.3380375 | 0.04744128 |
| 233902    | Fbxl19        | 0.33003205 | 0.04744128 |
| 18024     | Nfe2l2        | 0.43133275 | 0.04744128 |
| 11982     | Atp10a        | 1.53315358 | 0.04745871 |
| 51797     | Ctps          | 0.89872743 | 0.04745871 |
| 71750     | R3hdm2        | -0.345063  | 0.04745871 |
| 11911     | Atf4          | 0.4443412  | 0.04745871 |
| 12974     | Cs            | -0.4556258 | 0.04746147 |
| 442825    | A230083G16Rik | -1.0076404 | 0.0474786  |
| 257632    | Nod2          | -1.9823069 | 0.0474786  |
| 231430    | Cox18         | -0.9103154 | 0.0474786  |
| 627317    | Gm6745        | 0.59899193 | 0.0474786  |
| 19366     | Rad54l        | 1.06368679 | 0.04757332 |
| 320267    | Fubp3         | 0.29172768 | 0.04757583 |
| 21452     | Tcn2          | -1.2967422 | 0.04764255 |

|           |               |            |            |
|-----------|---------------|------------|------------|
| 66658     | Ccdc51        | -0.5773858 | 0.04765272 |
| 66980     | Zdhhc6        | -0.4804539 | 0.04769158 |
| 50799     | Slc25a13      | -0.746433  | 0.04772102 |
| 382051    | Pdp2          | -1.0358951 | 0.04777501 |
| 22003     | Tpm1          | 0.91132955 | 0.04777501 |
| 66377     | Ndufc1        | -0.5030192 | 0.04784425 |
| 619287    | Zcchc16       | -1.3377529 | 0.0479414  |
| 319748    | Zfp865        | 0.27005678 | 0.0479414  |
| 636462    | Ighv8-11      | -3.2027276 | 0.04808303 |
| 68229     | Al846148      | 0.33156533 | 0.04808572 |
| 13664     | Eif1a         | 0.43634555 | 0.04808572 |
| 211550    | Tifa          | 1.20247974 | 0.04813936 |
| 19331     | Rab19         | 0.89273236 | 0.04827096 |
| 15510     | Hspd1         | -1.1645239 | 0.04827096 |
| 11416     | Slc33a1       | -0.9613059 | 0.04827096 |
| 12426     | Cckbr         | -3.8654656 | 0.04832086 |
| 228357    | Lrp4          | -0.62145   | 0.04832086 |
| 22171     | Tyms          | 0.56570703 | 0.04838948 |
| 100504329 | Gm20176       | 0.56916228 | 0.04843744 |
| 406218    | Panx2         | 2.9238298  | 0.04843865 |
| 26558     | Homer3        | 1.20181225 | 0.04848579 |
| 27219     | Sgk2          | -0.8149385 | 0.04850149 |
| 214579    | Aldh5a1       | -0.9744587 | 0.04850149 |
| 67865     | Rgs10         | 1.06949164 | 0.04870698 |
| 68128     | Fam120aos     | -0.4634915 | 0.04882687 |
| 212307    | Mapre2        | -0.44804   | 0.04885433 |
| 242553    | Kank4         | -2.4230013 | 0.04885903 |
| 64655     | Mrps22        | -0.6972065 | 0.04885903 |
| 52864     | Slx4          | 0.36441633 | 0.04889962 |
| 106064    | AW549877      | -0.4630437 | 0.04889962 |
| 11717     | Ampd3         | 1.05874954 | 0.04899355 |
| 208647    | Creb3l2       | -0.6913016 | 0.04900484 |
| 66696     | Snx31         | 6.68101468 | 0.04903069 |
| 71122     | 4933408N05Rik | 2.12864092 | 0.04909782 |
| 432530    | Adcy1         | 1.23439033 | 0.04909782 |
| 108888    | Atad3a        | -0.4316287 | 0.04909782 |
| 57908     | Zfp318        | -0.3197443 | 0.04913734 |
| 14004     | Chchd2        | -0.5596853 | 0.04914973 |
| 13722     | Aimp1         | 0.47747184 | 0.04914973 |



|           |               |            |            |
|-----------|---------------|------------|------------|
| 74143     | Opa1          | -0.5896649 | 0.04914973 |
| 245865    | Spag4         | -1.938057  | 0.04918107 |
| 100861753 | Gm21188       | -0.6129836 | 0.04918107 |
| 100043899 | R3hdml        | -1.6907653 | 0.04921785 |
| 384009    | Glipr2        | 1.33944176 | 0.04921785 |
| 67946     | Spata6        | 0.57656565 | 0.04921816 |
| 97961     | Nol12         | 0.51199491 | 0.04923652 |
| 17134     | Mafg          | -0.5448495 | 0.04923652 |
| 632778    | Erich4        | -1.0210559 | 0.04925054 |
| 268973    | Nlrc4         | 3.80495145 | 0.04932265 |
| 108837    | Ibtk          | -0.256353  | 0.04932265 |
| 171463    | Il17rd        | 0.5269744  | 0.04942012 |
| 100040792 | Gm11627       | -2.8042454 | 0.04944276 |
| 17720     | ND4L          | -1.0155753 | 0.0495276  |
| 13099     | Cyp2c40       | -2.3261562 | 0.04956185 |
| 66381     | Rnf113a2      | 0.4027035  | 0.04956185 |
| 69216     | Ccdc23        | 0.58942797 | 0.04956185 |
| 100042049 | Gm15421       | 0.42287508 | 0.04956185 |
| 11787     | Apbb2         | -0.3831278 | 0.04956185 |
| 74411     | Ppapdc2       | -0.3038251 | 0.04956185 |
| 83669     | Wdr6          | 0.47826404 | 0.04956185 |
| 11927     | Atox1         | 0.524731   | 0.04956185 |
| 73331     | 1700034P13Rik | -1.3006482 | 0.04957121 |
| 23808     | Ash2l         | 0.24138478 | 0.04960822 |
| 12226     | Btg1          | 0.76583815 | 0.04971225 |
| 217038    | Mrm1          | -0.3329023 | 0.04977719 |
| 226421    | Rab7b         | 1.94511661 | 0.04978718 |
| 72748     | Hdhd3         | -1.248617  | 0.04978718 |
| 76267     | Fads1         | -0.6873724 | 0.04978718 |
| 52174     | Tmem222       | 0.28817292 | 0.04978718 |
| 75111     | 4930512H18Rik | -3.2729854 | 0.04985418 |
| 56535     | Pex3          | -0.5475272 | 0.04985418 |
| 14683     | Gnas          | -0.2526206 | 0.04997173 |

**Supplementary Table 4. List of primary antibodies used in this study.**

| <b>Antibody</b>                       | <b>Source</b>       | <b>Identifier</b> |
|---------------------------------------|---------------------|-------------------|
| Rabbit Phospho-Rb (Ser807/811)        | Cell Signaling      | #8516             |
| Mouse GFP                             | ProteinTech         | 50430-2-AP        |
| Rabbit PCNA (D3H8P)                   | Cell Signaling      | #13110            |
| Rabbit Phospho-Histone H2A.X (Ser139) | Cell Signaling      | #9718             |
| Mouse Phospho-Histone H2A.X (Ser139)  | Millipore           | 05-636            |
| Rabbit Collagen 3                     | Proteintech         | 22734-1-AP        |
| Rabbit cyclin A (C-19)                | Santa Cruz          | sc-596            |
| Mouse cyclin D1                       | Santa Cruz          | sc-8396           |
| Rabbit $\beta$ -Actin (D6A8)          | Cell Signaling      | #8457             |
| Mouse Gapdh                           | Santa Cruz          | sc-47724          |
| Rat TIM-1/KIM-1/HAVCR                 | R&D systems         | MAB1817           |
| Mouse 53BP1                           | Millipore           | MAB3804           |
| Rabbit 53BP1                          | Novus Biologicals   | NB100-304         |
| LTL lectin                            | VectorLaboratories  | FL-1321           |
| Rabbit Sox9                           | Millipore           | AB5535            |
| Mouse Krt20                           | Dako                | M7019             |
| Rabbit MCM6                           | Proteintech         | 13347-2-AP        |
| Rabbit MCM2                           | Cell Signaling      | #3619             |
| Rabbit p16                            | Proteintech         | 10883-1-AP        |
| Rabbit Ki67                           | ThermoScientific    | PA5-19462         |
| Rabbit p21                            | Cell Signaling      | #2947             |
| Mouse p21                             | Santa Cruz          | sc-6246           |
| Mouse Phospho-ATM (Ser1981)           | Santa Cruz          | sc-47739          |
| Rabbit Fancd2                         | Abcam               | ab108928          |
| Rabbit Phospho-RPA32 (S4/S8)          | Bethyl Laboratories | A300-245A         |
| Rabbit Histone H3                     | Cell Signaling      | #9715             |
| Rabbit Phospho-Histone H3 (Ser10)     | Cell Signaling      | #53348            |
| Goat uPAR                             | R&D systems         | AF534             |
| Rabbit a/b Tubulin                    | Cell Signaling      | #2148             |
| Rabbit LC3                            | ProteinTech         | 12135-1-AP        |
| Rabbit Phospho-KAP1                   | Bethyl Laboratories | A300-767A-M       |
| Mouse PAX2                            | DSHB                | AB_2722284        |
| Rabbit Vimentin (D21H3)               | Cell Signaling      | #5741             |
| Rabbit Fan1                           | Novus Biologicals   | #42677            |
| Rabbit Fan1                           | Abcam               | ab56425           |
| Rabbit Fan1                           | Abcam               | ab129488          |
| Rabbit Vcam1                          | ThermoScientific    | PA5-80213         |
| Mouse Ccl2                            | ThermoScientific    | MA5-17040         |
| Rabbit 8-OHdG                         | Biossusa            | Bs-1278R          |

**Supplementary Table 5. List of quantitative RT-PCR primers and sgRNA sequence used in this study.**

| Gene                         | Species | Forward                     | Reverse                    |
|------------------------------|---------|-----------------------------|----------------------------|
| Aurkb                        | mouse   | TGCAGGGGAACTGAAGATTG        | CGATGCACCATAGATCTACCATT    |
| Gapdh                        | mouse   | GACTTCAACAGCAACTCCCA        | TGTAGCCGTATTCATTGTCATACC   |
| Bak                          | mouse   | ATATTAACCGGCGCTACGAC        | AGGCGATCTTGGTGAAGAGT       |
| Bcl2l1                       | mouse   | CCACTATCCCACGCTGCTAAC       | ACCGCAATGATATTATTGGCAGA    |
| Birc5                        | mouse   | GGAATTGGAAGGCTGGGAA         | CCATCTGCTTCTTGACAGTGA      |
| Brca1                        | mouse   | CGAATCTGAGTCCCCTAAAGAGC     | AAGCAACTTGACCTTGGGGTA      |
| Ccnb1                        | mouse   | TGAGCCTGAACCTGAACTTG        | ACATCAGAGAAAGCCTGACAC      |
| Ccne1                        | mouse   | GTGGCTCCGACCTTTCAGTC        | CACAGTCTTGCAATCTTGGCA      |
| Cdkna1                       | mouse   | GCAGATCCACAGCGATATCC        | CAACTGCTCACTGTCCACGG       |
| Cdkn2a                       | mouse   | AATCTCCGCGAGGAAAGC          | GTCTGCAGCGGACTCCAT         |
| Ccnd1                        | mouse   | CCCAACAACCTTCTCTCCTG        | TCCAGAAGGGCTTCAATCTG       |
| Ccl2                         | mouse   | CCCAATGAGTAGGCTGGAGA        | TCTGGACCCATTCTTCTTG        |
| Col1                         | mouse   | GCAGGTTACCTACTCTGTCTT       | CTTGCCCATTCATTTGCT         |
| Dock10                       | mouse   | GATGCTGGTGGACCTTCAAT        | CACAGGGTTGGGTGTCTTCT       |
| Erc1                         | mouse   | TTCGGTGAGGTGATTCCCGAT       | GATGAGGTTGTGGTAGCGG        |
| Exo1                         | mouse   | TGGCTGTGGATACCTACTGTT       | ATCGGCTTGACCCCATAGAC       |
| Fn1                          | mouse   | GCTCAGCAAATCGTGCAGC         | CTAGGTAGGT CCGTTCCCACT     |
| Havcr1                       | mouse   | AGGAAGTCAGCATCTCTAAGCG      | ACACAGAAAATCGCCTTGGC       |
| Il6                          | mouse   | GTTCTCTGGGAAATCGTGGA        | GGTACTCCAGAAGACCAGAGGA     |
| Il1b                         | mouse   | GCACTACAGGCTCCGAGATGAAC     | TTGTCGTTGCTTGGTTCTCCTGT    |
| Krt20                        | mouse   | GCAGTGGTACGAAACCAACG        | CTGCAGCCAGCTTAGCATTG       |
| Mcp1                         | mouse   | CCCAATGAGTAGGCTGGAGA        | TCTGGACCCATTCTTCTTG        |
| Ngal                         | mouse   | CAAGCAATACTTCAAAATTACCCTGTA | GCAAAGCGGGTGAAACGTT        |
| Pai                          | mouse   | TGGCTCAGAGCAACAAGTTC        | GCAGTTCACGACGTCATACTCG     |
| Pkmyt                        | mouse   | TCAAGGTGCGCTCTAAGGAAG       | AGTTTACGAGTTCGGTCTTTGG     |
| Rad51                        | mouse   | ATTCCGAAGTGGGAAGACAC        | ATGTACATGGCCCTCCCTTC       |
| Sox9                         | mouse   | GTGCAAGCTGGCAAAGTTGA        | TGCTCAGTTCACCGATGCC        |
| Tgfb                         | mouse   | AGCCCGAAGCGGACTACTAT        | TCCACATGTTGCTCCACACT       |
| Tp53                         | mouse   | AGCGCTGCTCCGATGGT           | TTCTTCCACCCGGATAAGA        |
| Vcam1                        | mouse   | GCACAAAGAAGGCTTTGAAGCA      | GATTTGAGCAATCGTTTTGTATTGAG |
| <b>sgRNA target sequence</b> |         |                             |                            |
| FAN1                         | human   | ACTTCGTTCAAGTGATCCAGGG      |                            |

## SUPPLEMENTARY REFERENCES

1. Airik R, Schueler M, Airik M, Cho J, *et al.* A FANCD2/FANCI-Associated Nuclease 1-Knockout Model Develops Karyomegalic Interstitial Nephritis. *J Am Soc Nephrol* 2016; **27**: 3552-3559.
2. Tan RJ, Chartoumpekis DV, Rush BM, Zhou D, *et al.* Keap1 hypomorphism protects against ischemic and obstructive kidney disease. *Sci Rep* 2016; **6**: 36185.
3. Emllet DR, Pastor-Soler N, Marciszyn A, Wen X, *et al.* Insulin-like growth factor binding protein 7 and tissue inhibitor of metalloproteinases-2: differential expression and secretion in human kidney tubule cells. *Am J Physiol Renal Physiol* 2017; **312**: F284-F296.
4. Ando R, Sakaue-Sawano A, Shoda K, Miyawaki A. Two new coral fluorescent proteins of distinct colors for sharp visualization of cell-cycle progression. *bioRxiv* 2020: 2020.2003.2030.015156.
5. Liao Y, Smyth GK, Shi W. The Subread aligner: fast, accurate and scalable read mapping by seed-and-vote. *Nucleic Acids Res* 2013; **41**: e108.
6. Liao Y, Smyth GK, Shi W. featureCounts: an efficient general purpose program for assigning sequence reads to genomic features. *Bioinformatics* 2014; **30**: 923-930.
7. Ritchie ME, Phipson B, Wu D, Hu Y, *et al.* limma powers differential expression analyses for RNA-sequencing and microarray studies. *Nucleic Acids Res* 2015; **43**: e47.
8. Macosko EZ, Basu A, Satija R, Nemesh J, *et al.* Highly Parallel Genome-wide Expression Profiling of Individual Cells Using Nanoliter Droplets. *Cell* 2015; **161**: 1202-1214.
